# Supplementary material for: Cetyltrimethyl ammonium bromide catalysed oxidative cross dehydrogenative coupling of benzylic C(sp3)–H bonds in methylarenes with P(O)–OH compounds
Source: Royal Society of Chemistry journal article supplement (doi:10.1039/c8ob02772b), 2018-12-13
Supplement: c8ob02772b1.pdf [file c8ob02772b1.pdf]

# Cetyltrimethyl Ammonium Bromide Catalysed Oxidative Cross Dehydrogenative Coupling of Benzylic C(sp<sup>3</sup>)-H Bonds in Methylarenes with P(O)-OH Compounds

Hang Li <sup>a1</sup>, Jian Lei <sup>a1</sup>, Yongping Liu <sup>b</sup>, Yi Chen<sup>\*b</sup>, Chak-Tong Au <sup>c</sup>  
and Shuang-Feng Yin<sup>\*a</sup>

a State Key Laboratory of Chemo/Biosensing and Chemometrics, College of Chemistry and Chemical Engineering, Hunan University, Changsha 410082, China. E-mail: sf\_yin@hnu.edu.cn.

b School of Medicine, Hunan University of Chinese Medicine, Changsha 410208, PR China. Address here.

c College of Chemistry and Chemical Engineering, Hunan Institute of Engineering, Xiangtan, 411104, P. R. China.

<sup>1</sup> H. Li and J. Lei contribute equally to this work.

## Table of Contents

|                                                                                             |    |
|---------------------------------------------------------------------------------------------|----|
| Control experiments.....                                                                    | 2  |
| Copies of <sup>1</sup> H, <sup>13</sup> C, <sup>31</sup> P NMR charts of the Compounds..... | 7  |
| References.....                                                                             | 51 |



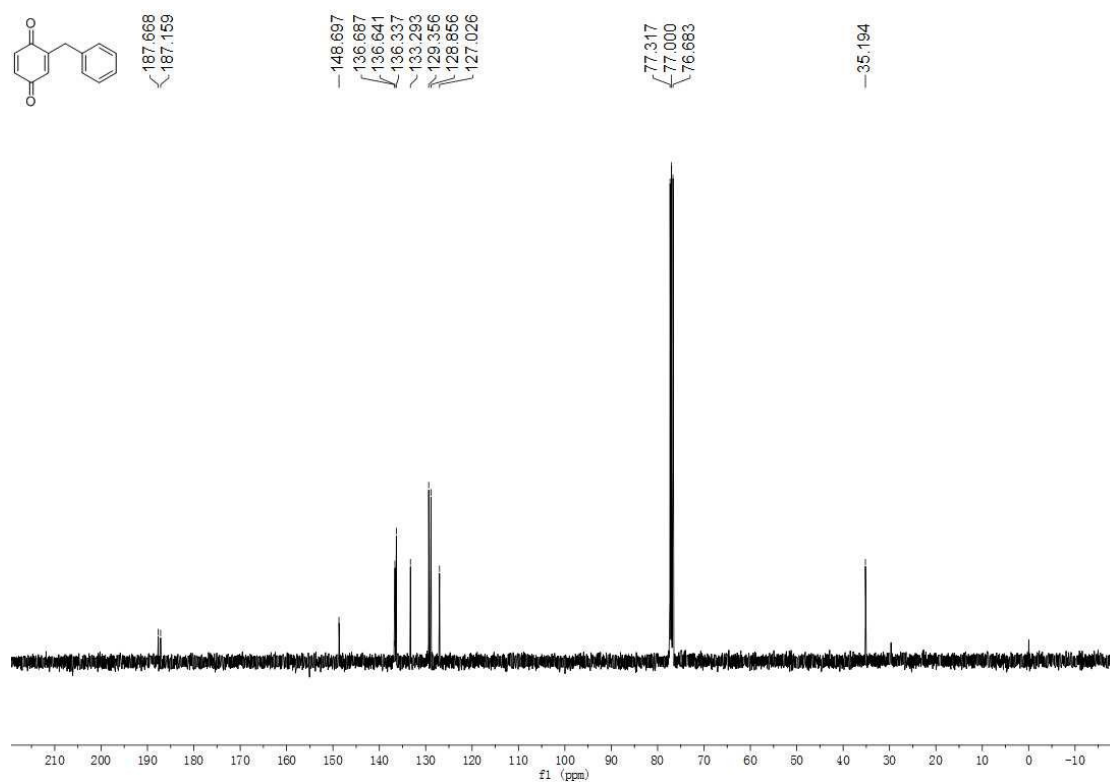

<sup>13</sup>C NMR (100MHz, CDCl<sub>3</sub>) spectrum of compound **5**  
 Yellow oil <sup>1</sup> R<sub>f</sub> = 0.40 (petroleum ether/ethyl acetate = 2:1), <sup>1</sup>H NMR (400 MHz, CDCl<sub>3</sub>) δ 7.41–7.37 (m, 2H), 7.34–7.30 (m, 2H), 7.24 (s, 1H), 6.85–6.75 (m, 2H), 6.43 (s, 1H), 3.81 (s, 2H). <sup>13</sup>C NMR (100 MHz, CDCl<sub>3</sub>) δ 187.7 (s), 187.2 (s), 148.7 (s), 136.7 (s), 136.6 (s), 136.3 (s), 133.3 (s), 129.4 (s), 128.9 (s), 127.0 (s), 35.2 (s).

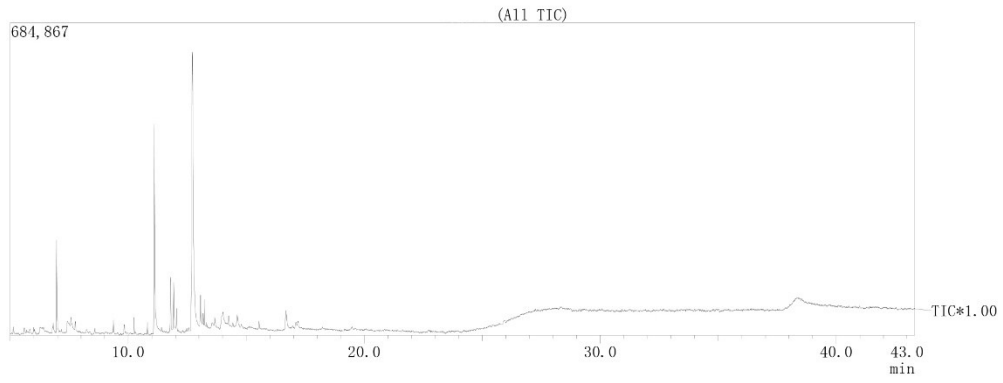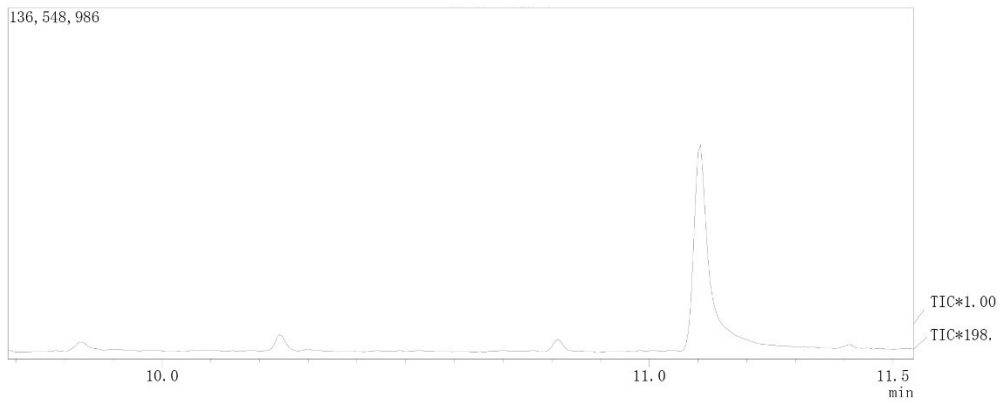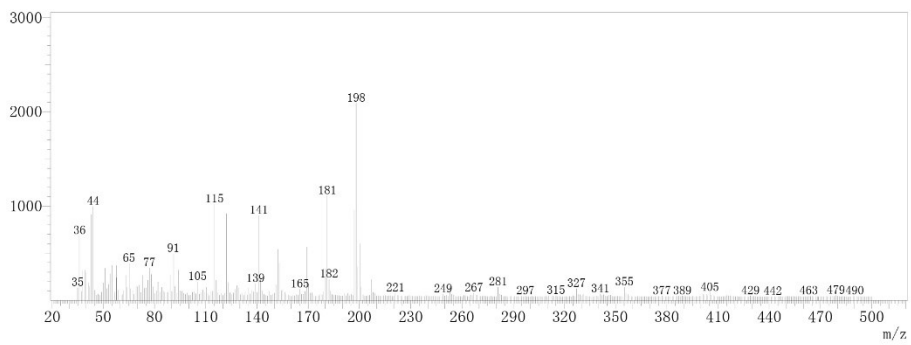

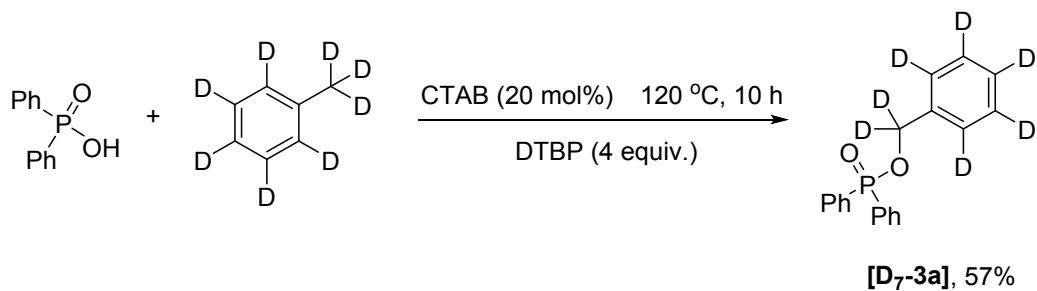

Ph<sub>2</sub>P(O)OH (0.1 mmol), CTAB (20 mol%), DTBP (0.4 mmol) and toluene-d<sub>8</sub> (0.5 ml) were added in a 25-mL Schlenk tube with magnetic stirring at room temperature. With constant stirring the resulting mixture was heated to 120 °C and kept at this temperature for 10 h. Then the reaction solution was allowed to cool to ambient temperature, and then transferred to a round-bottom flask. Silica gel (4.0 g) was added, and the solvent was removed under reduced pressure to afford a free-flowing powder. This powder was then dry-loaded onto a silica gel column and purified by flash chromatography using petroleum ether/ethyl acetate = 5 / 1 (v/v) as eluent to give **[D<sub>7</sub>-3a]**.

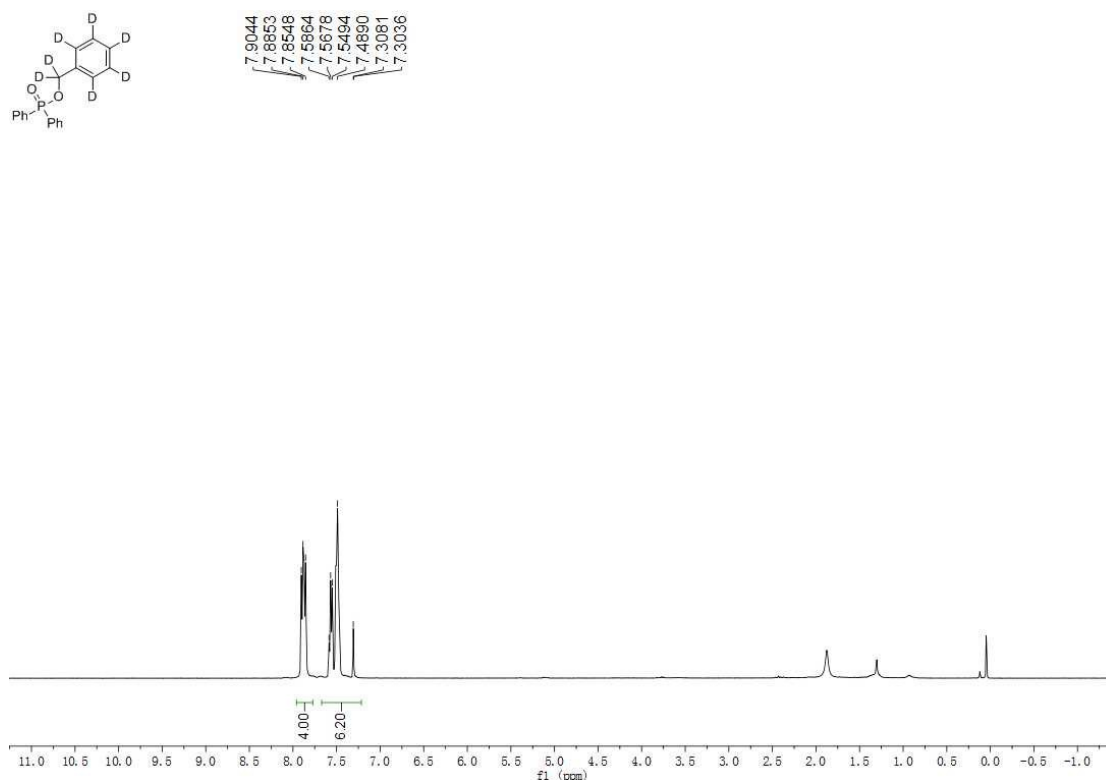

<sup>1</sup>H NMR (400MHz, CDCl<sub>3</sub>) spectrum of compound **[D<sub>7</sub>-3a]**

Colorless oil *R<sub>f</sub>* = 0.20 (petroleum ether/ethyl acetate = 2:1) <sup>1</sup>H NMR (400 MHz, CDCl<sub>3</sub>) δ 7.90–7.85 (m, 4H), 7.59–7.30 (m, 6H).

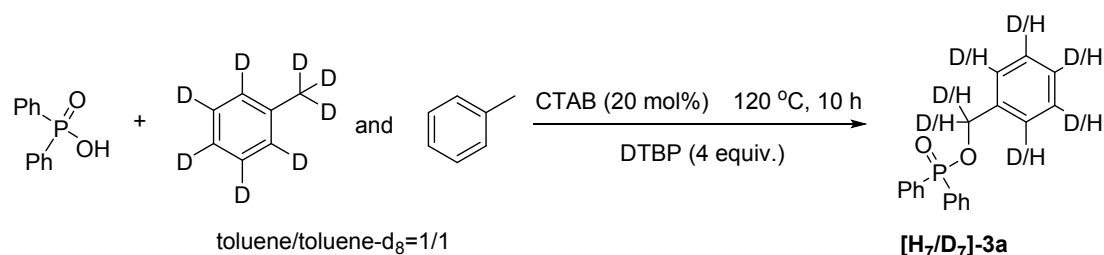

$\text{Ph}_2\text{P}(\text{O})\text{OH}$  (0.1 mmol), CTAB (20 mol%), DTBP (0.4 mmol) and solvent (1.0 ml, toluene/toluene- $d_8$ , 1:1, v/v) were added in a 25-mL Schlenk tube with magnetic stirring at room temperature. With constant stirring the resulting mixture was heated to 120 °C and kept at this temperature for 10 h. Then the reaction solution was allowed to cool to ambient temperature, and then transferred to a round-bottom flask. Silica gel (4.0 g) was added, and the solvent was removed under reduced pressure to afford a free-flowing powder. This powder was then dry-loaded onto a silica gel column and purified by flash chromatography using petroleum ether/ethyl acetate = 5 / 1 (v/v) as eluent to give **[H<sub>7</sub>/D<sub>7</sub>]-3a**.

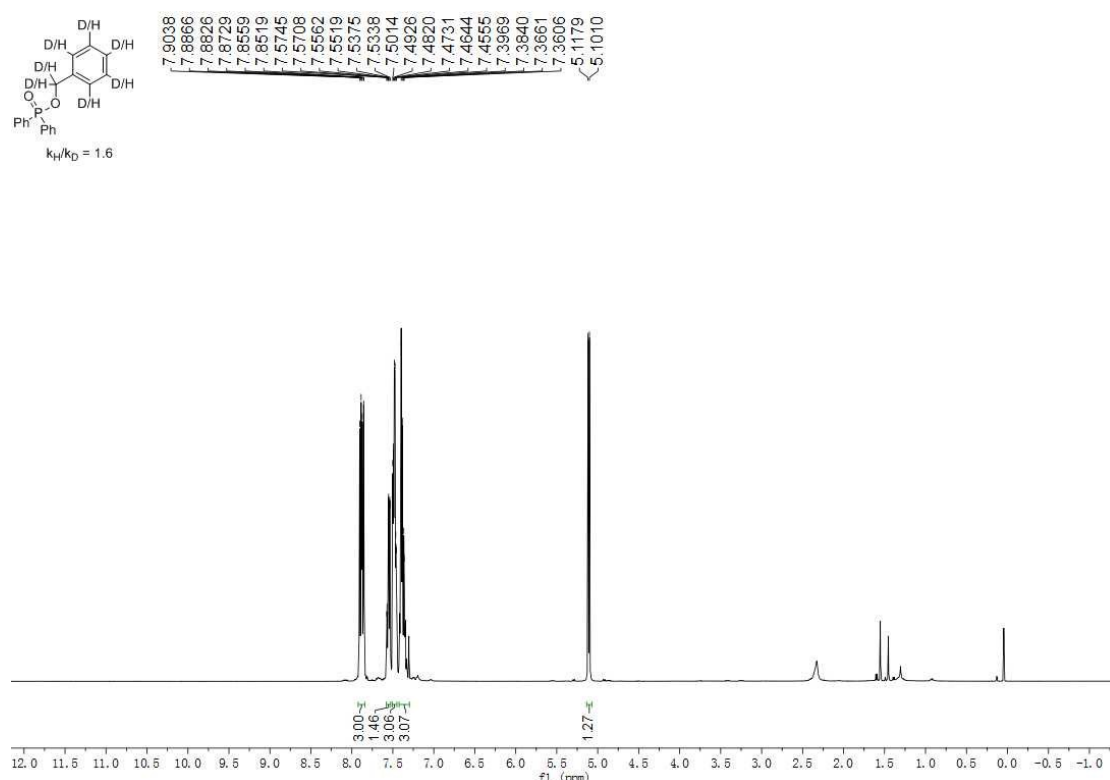

Colorless oil  $R_f = 0.20$  (petroleum ether/ethyl acetate = 2:1)  $^1\text{H}$  NMR (400 MHz,  $\text{CDCl}_3$ )  $\delta$  7.90–7.85 (m, 3H), 7.57–7.53 (m, 1H), 7.50–7.46 (m, 3H), 7.40–7.36 (m, 3H), 5.11 (d,  $J = 6.8$  Hz, 1H).

## Copies of $^1\text{H}$ , $^{13}\text{C}$ , $^{31}\text{P}$ NMR charts of the Compounds

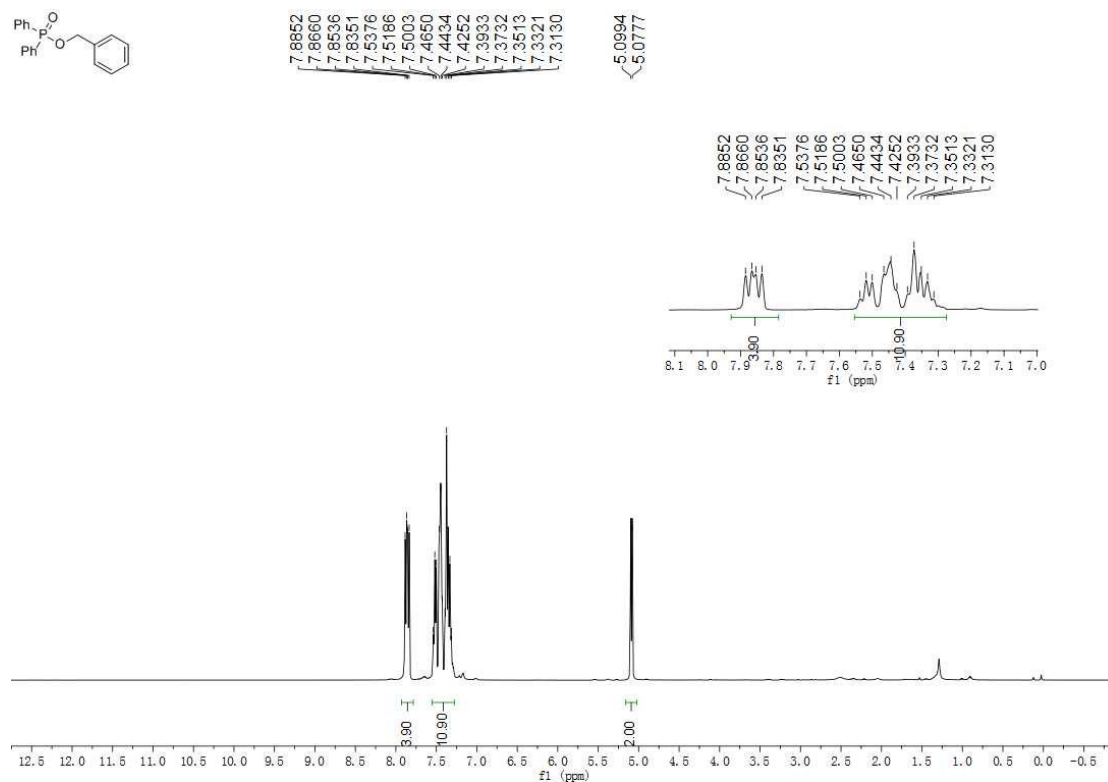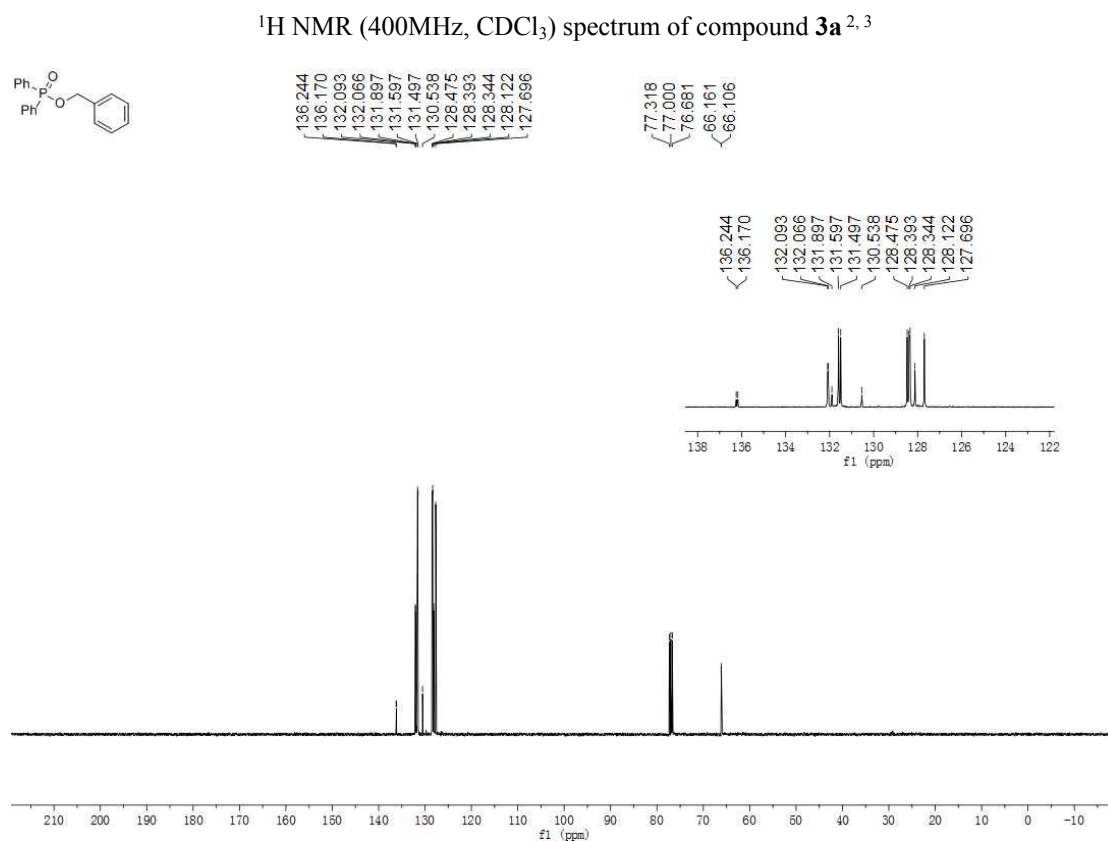

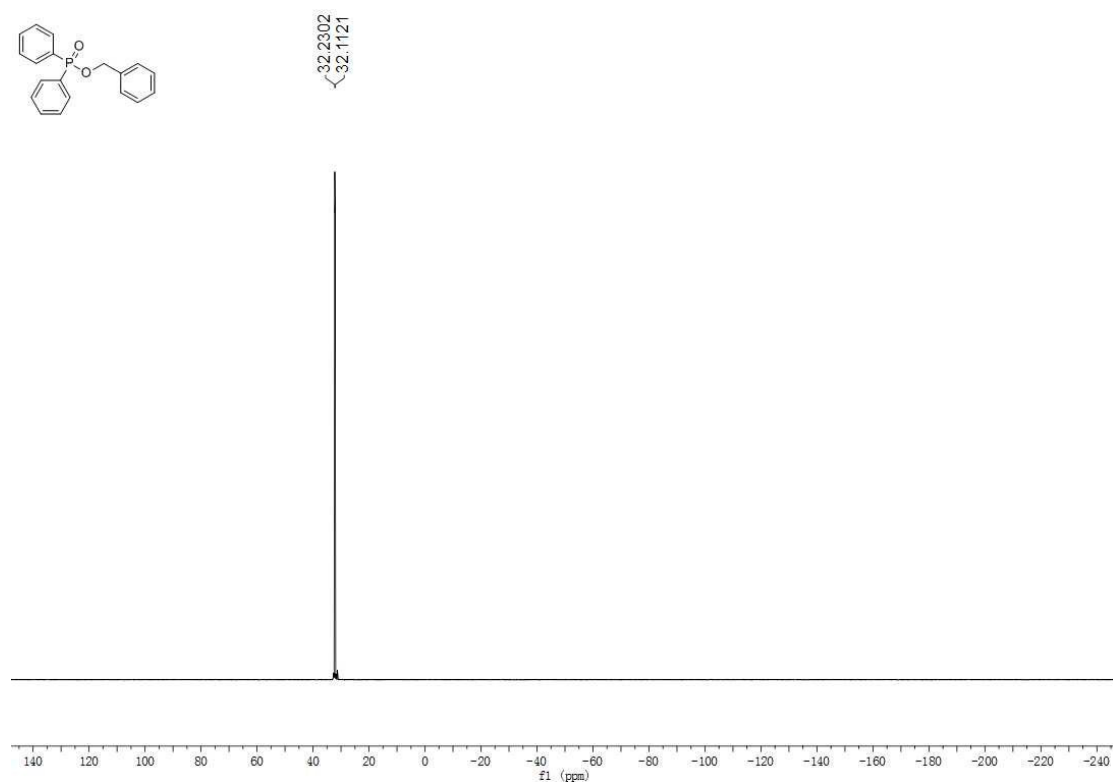

$^{31}\text{P}$  NMR (162MHz,  $\text{CDCl}_3$ ) spectrum of compound **3a**<sup>2,3</sup>

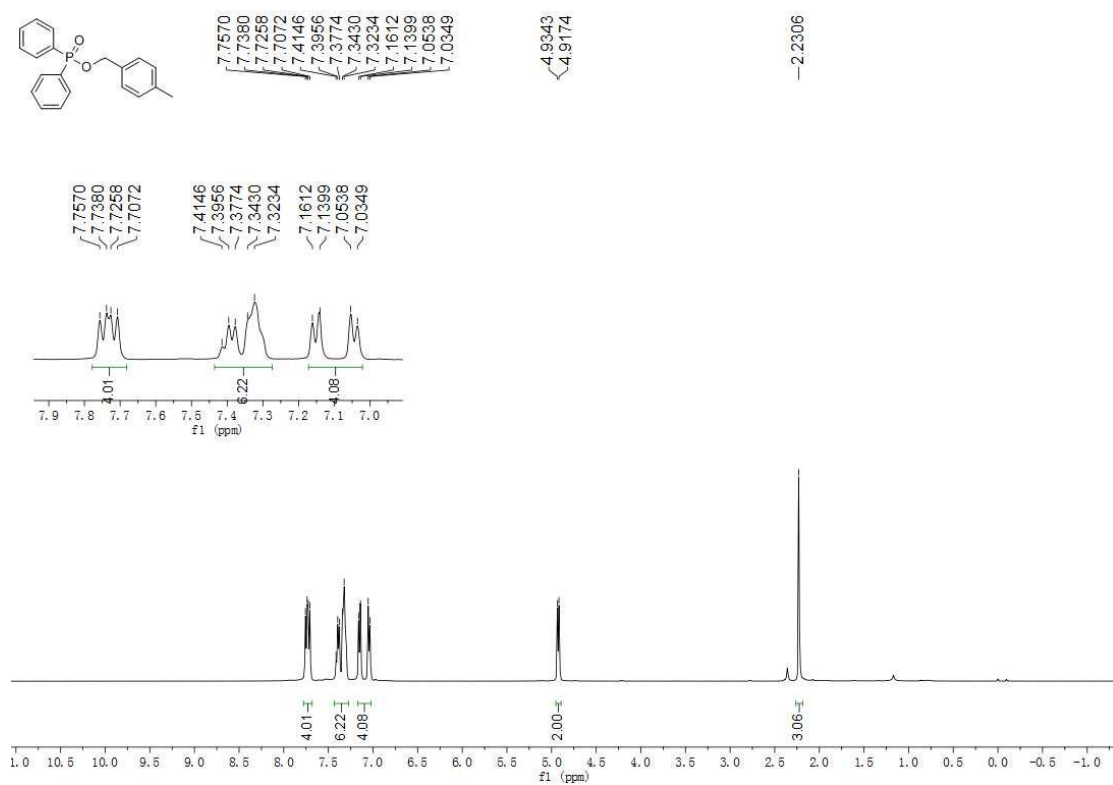

$^1\text{H}$  NMR (400MHz,  $\text{CDCl}_3$ ) spectrum of compound **3b**



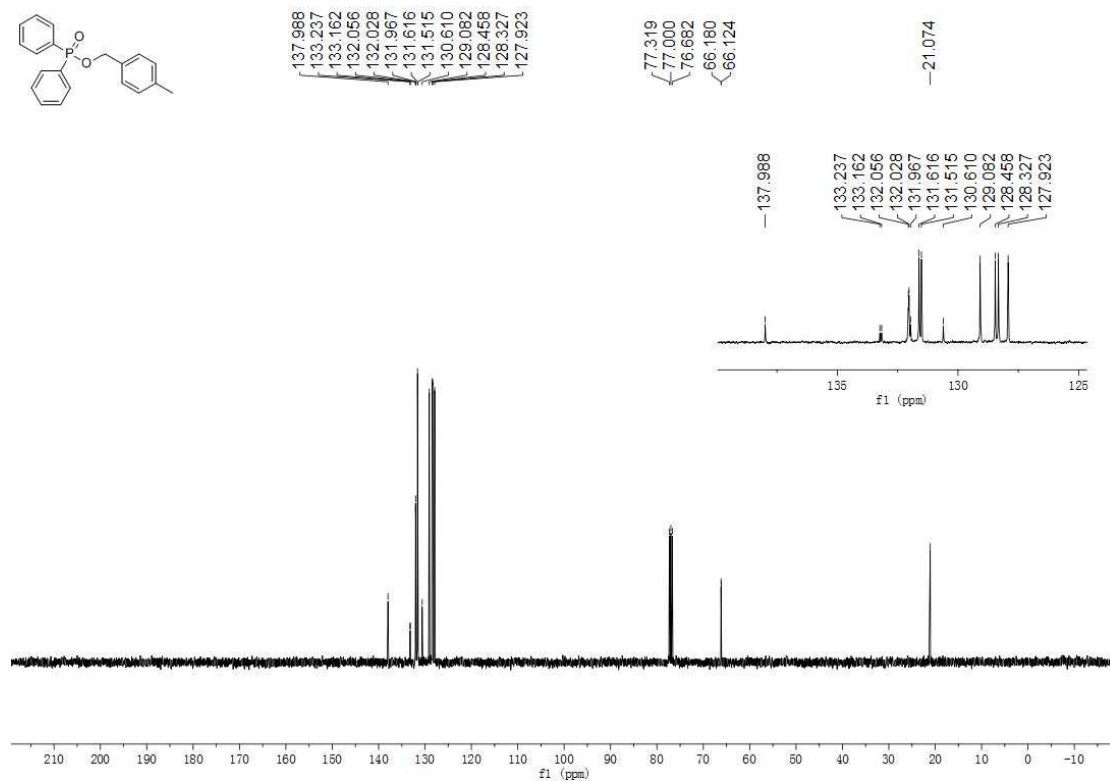

$^{13}\text{C}$  NMR (100MHz,  $\text{CDCl}_3$ ) spectrum of compound **3b**

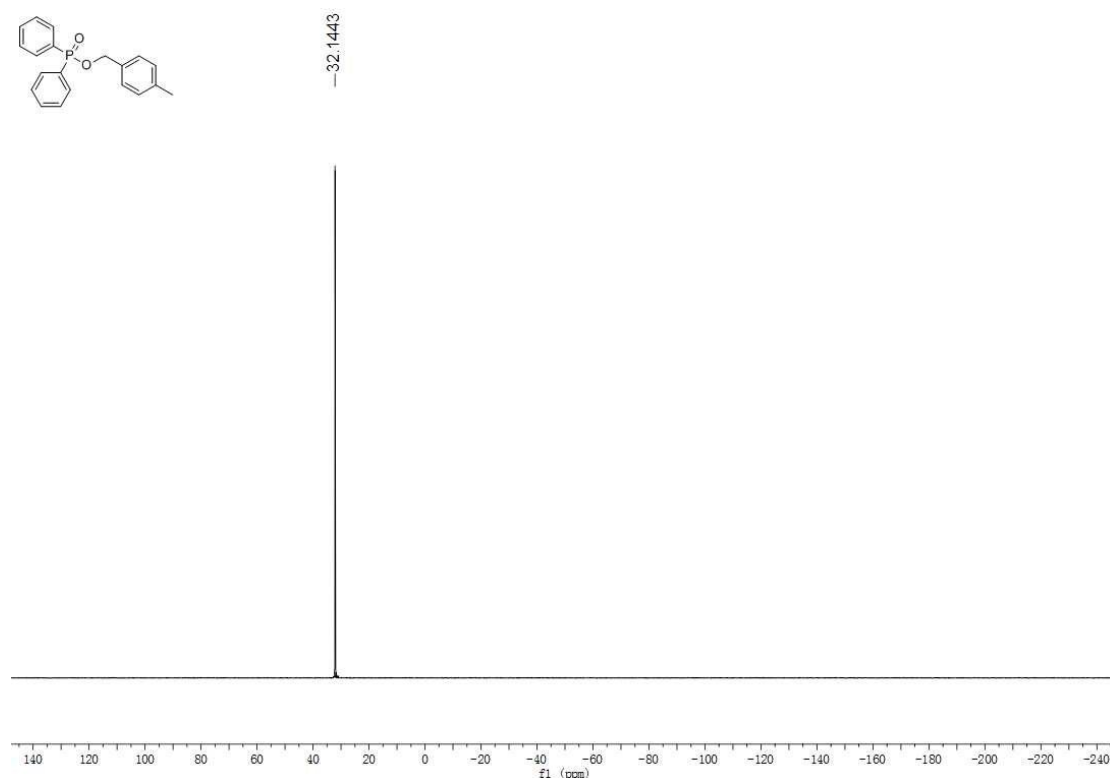

$^{31}\text{P}$  NMR (162MHz,  $\text{CDCl}_3$ ) spectrum of compound **3b**

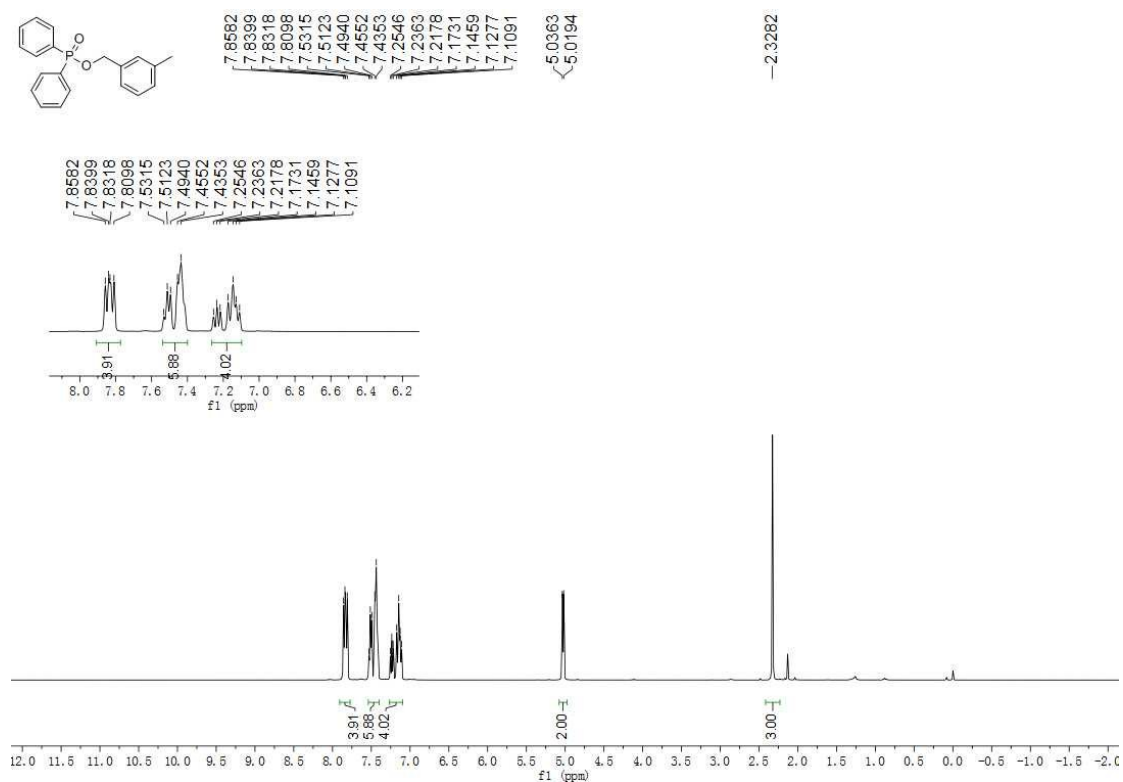

**<sup>1</sup>H NMR (400MHz, CDCl<sub>3</sub>) spectrum of compound 3c**

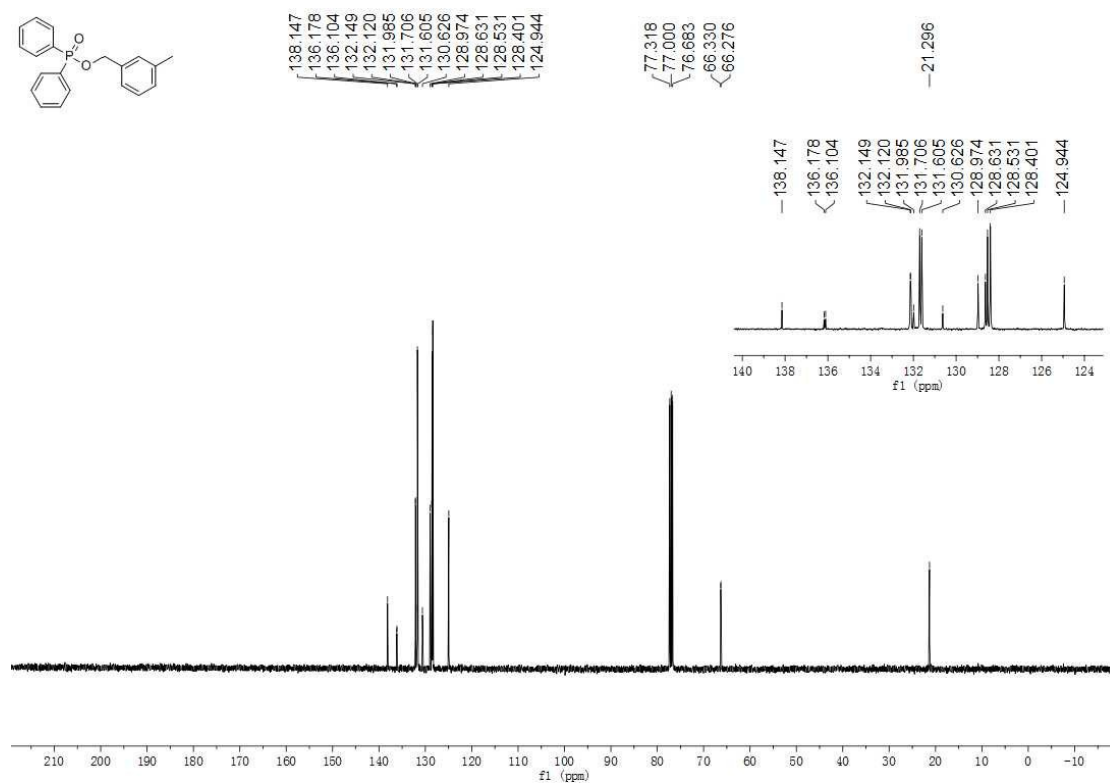

**<sup>13</sup>C NMR (100MHz, CDCl<sub>3</sub>) spectrum of compound 3c**

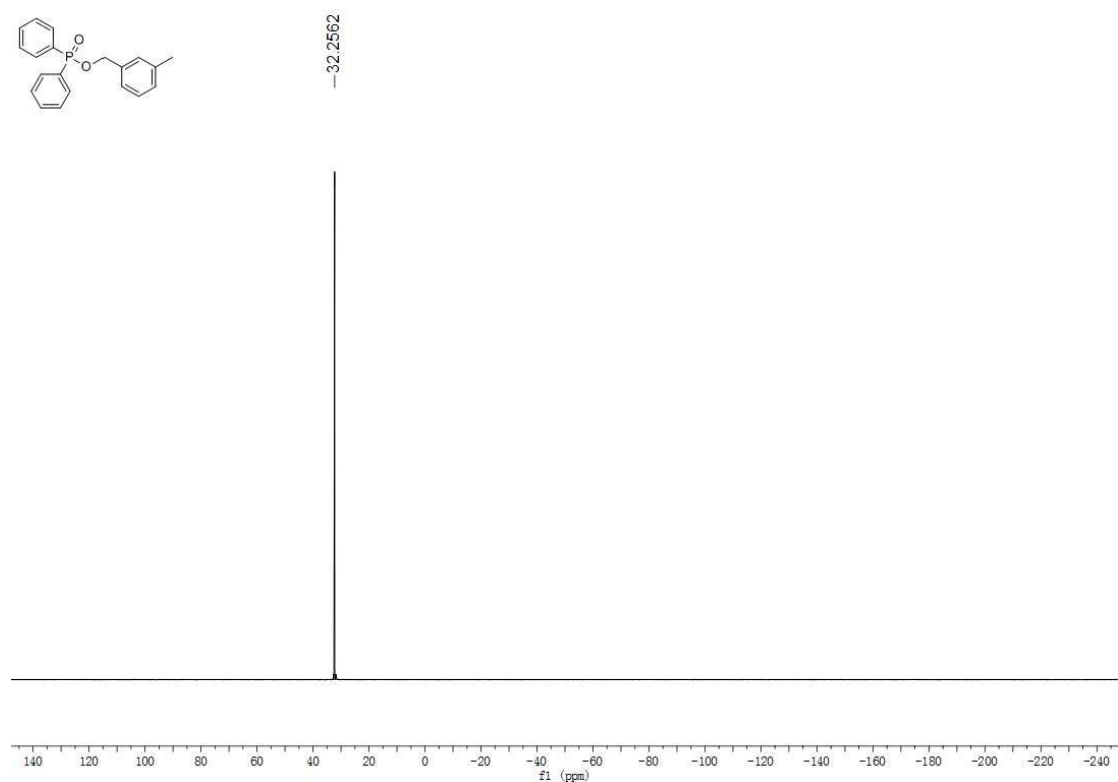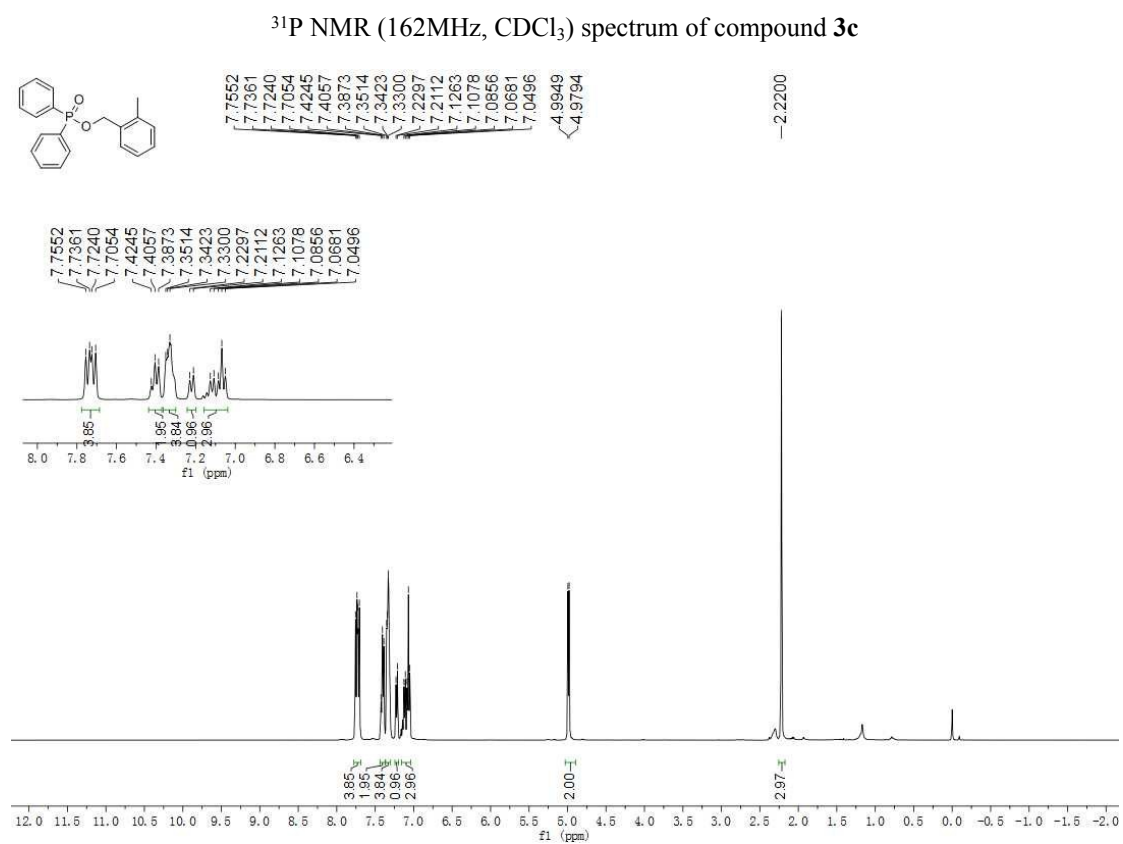

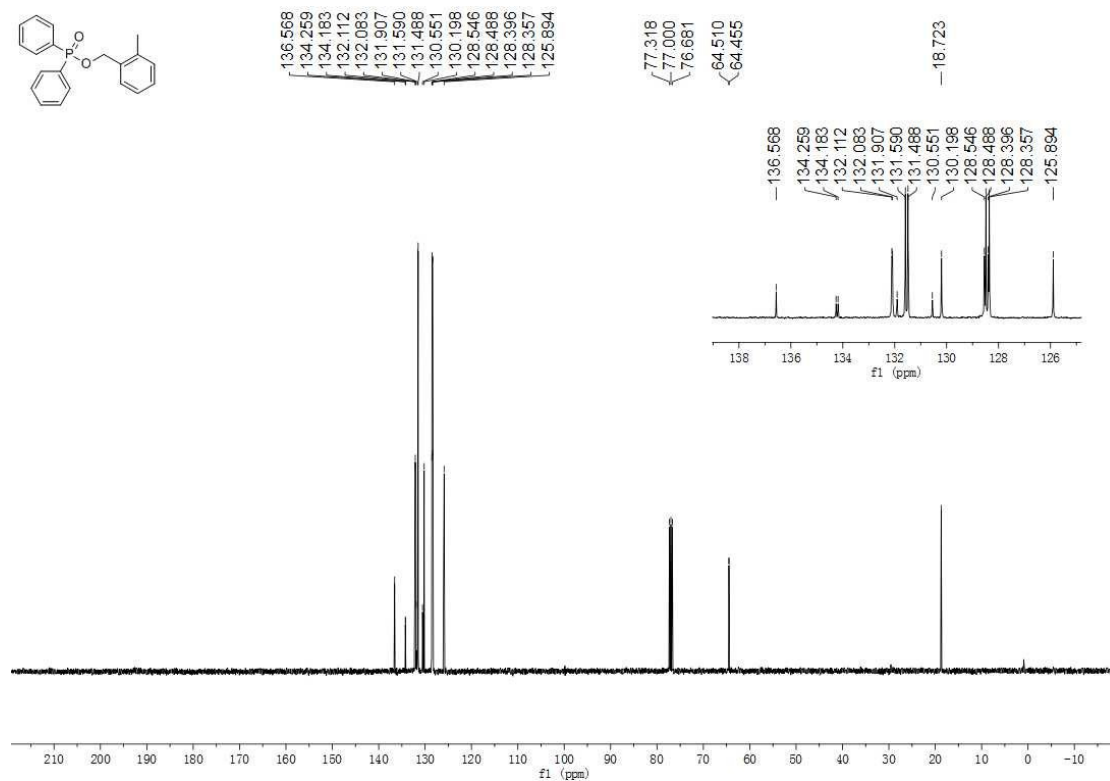

$^{13}\text{C}$  NMR (100MHz,  $\text{CDCl}_3$ ) spectrum of compound **3d**

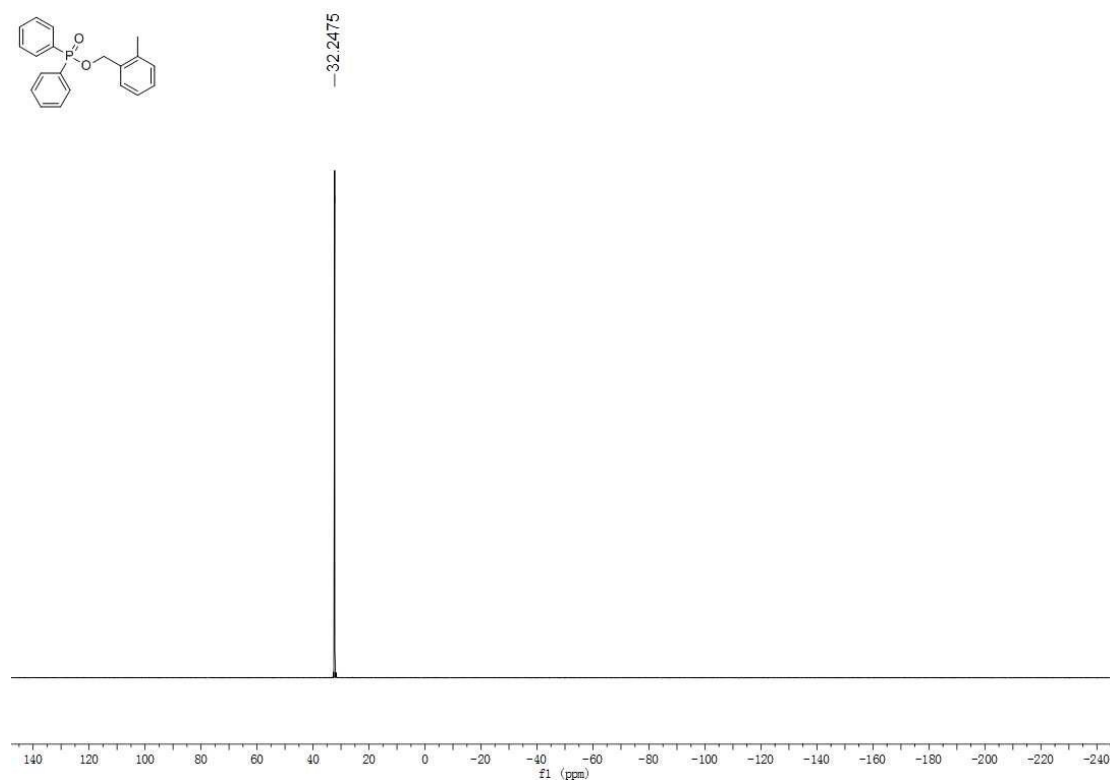

$^{31}\text{P}$  NMR (162MHz,  $\text{CDCl}_3$ ) spectrum of compound **3d**

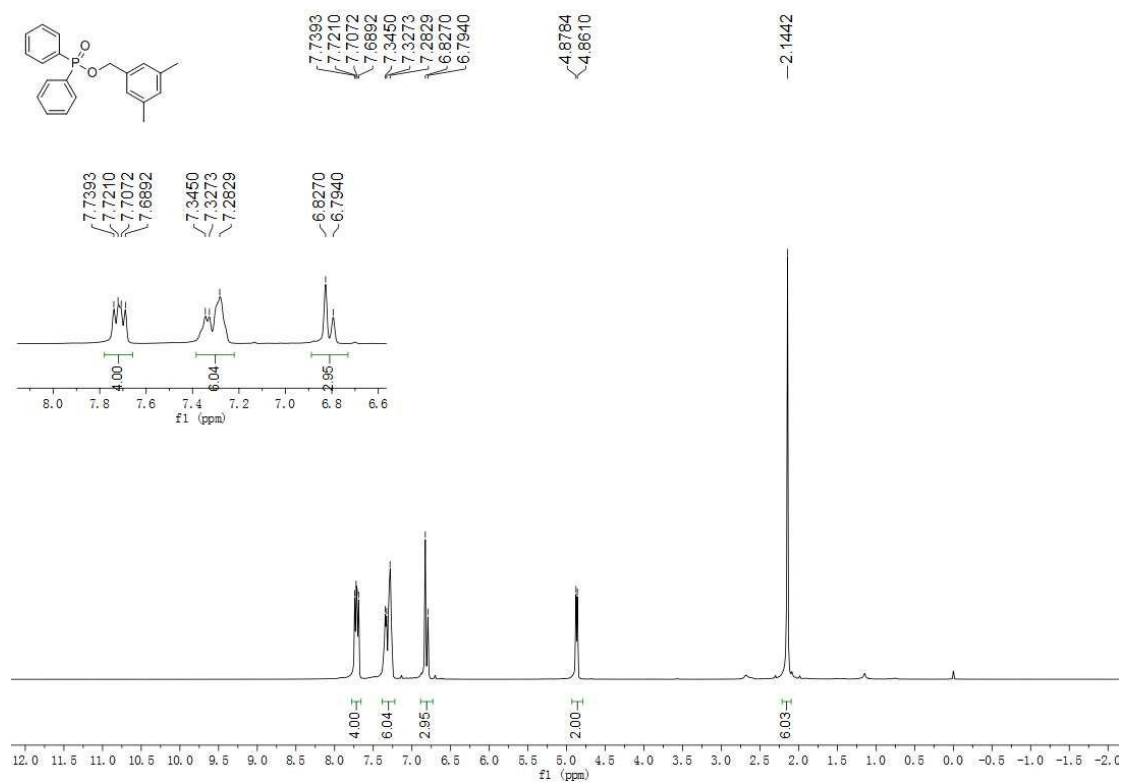

**<sup>1</sup>H NMR (400MHz, CDCl<sub>3</sub>) spectrum of compound 3e**

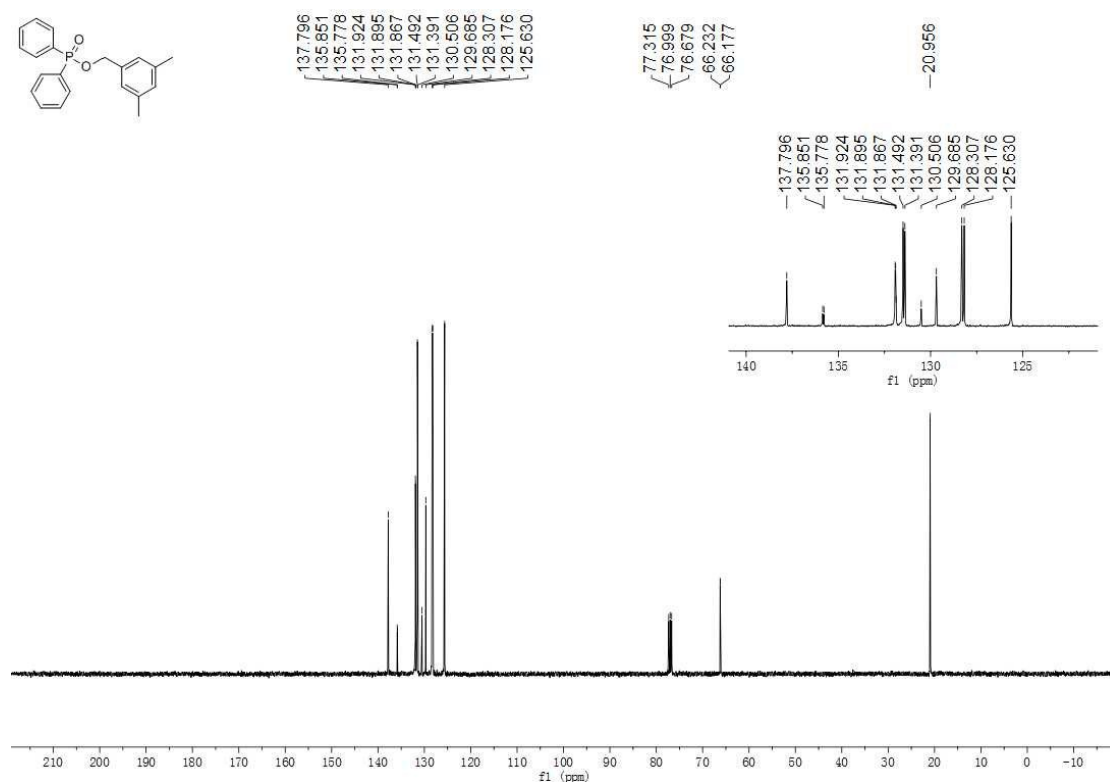

**<sup>13</sup>C NMR (100MHz, CDCl<sub>3</sub>) spectrum of compound 3e**

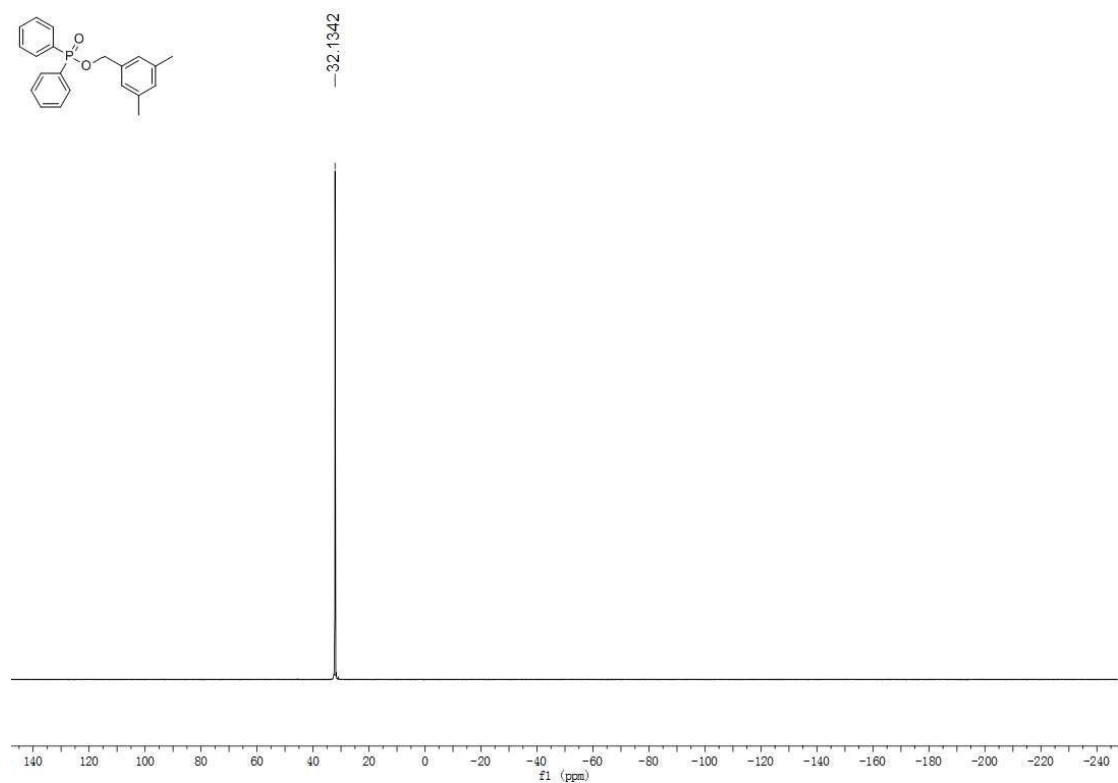

$^{31}\text{P}$  NMR (162MHz,  $\text{CDCl}_3$ ) spectrum of compound **3e**

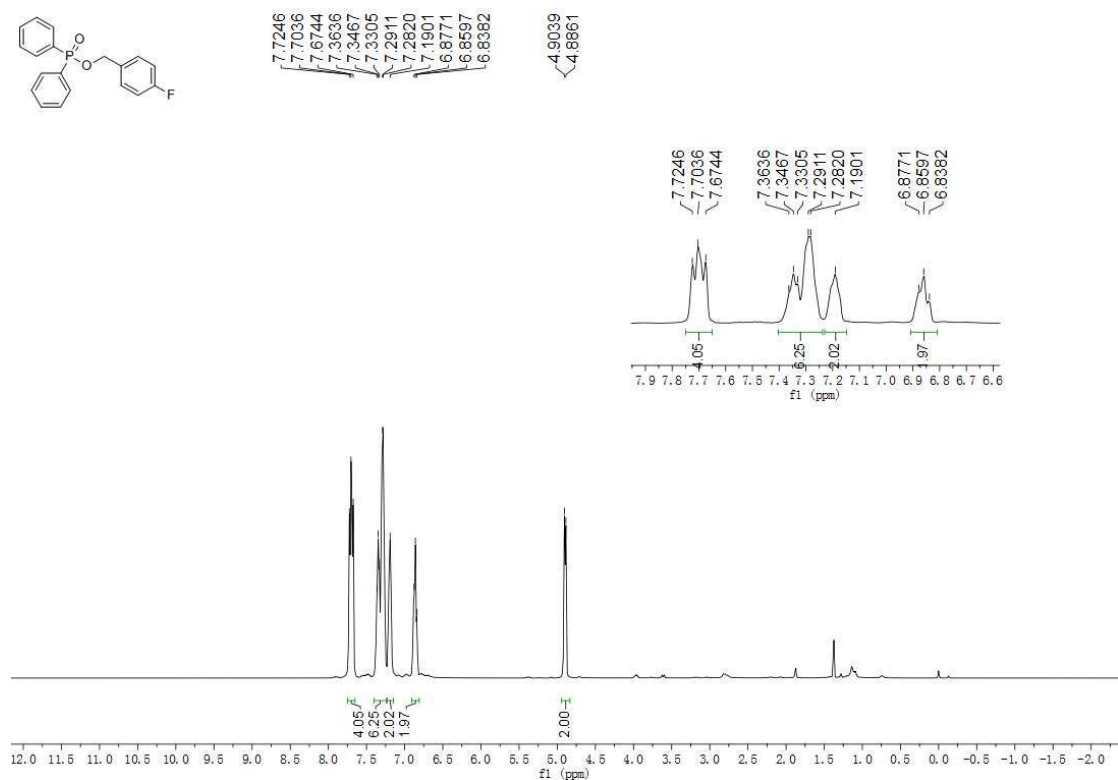

$^1\text{H}$  NMR (400MHz,  $\text{CDCl}_3$ ) spectrum of compound **3f**

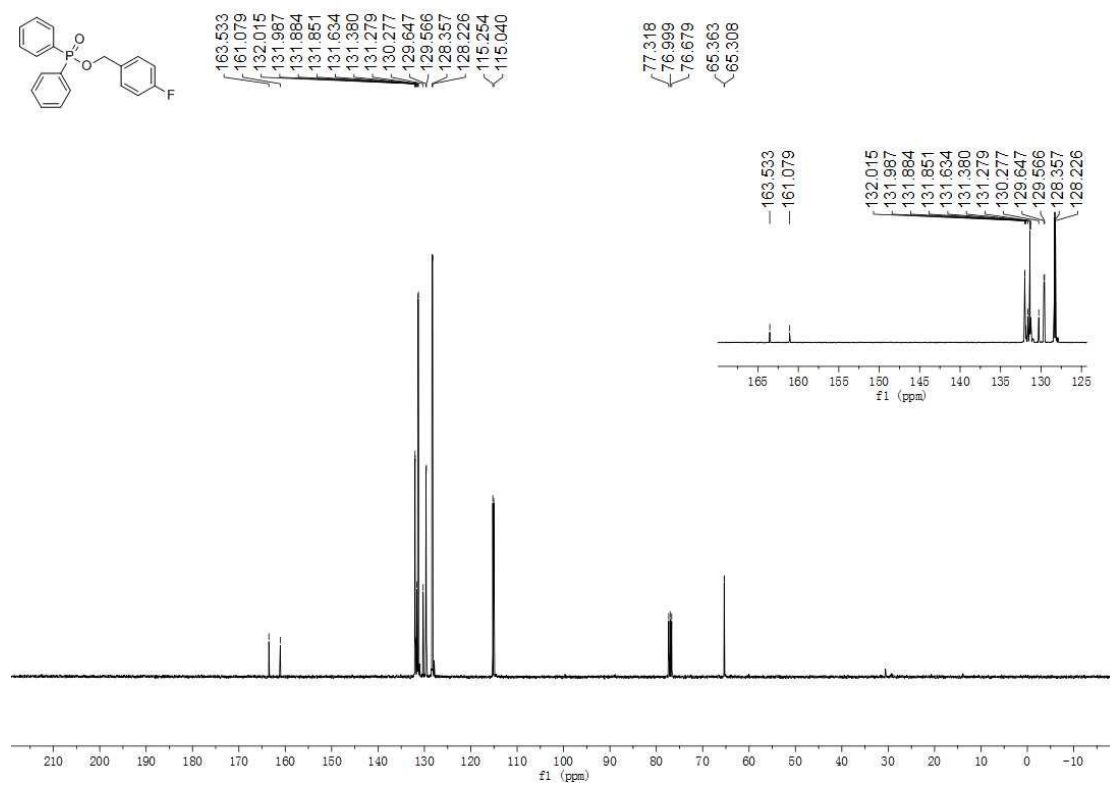

<sup>13</sup>C NMR (100MHz, CDCl<sub>3</sub>) spectrum of compound **3f**

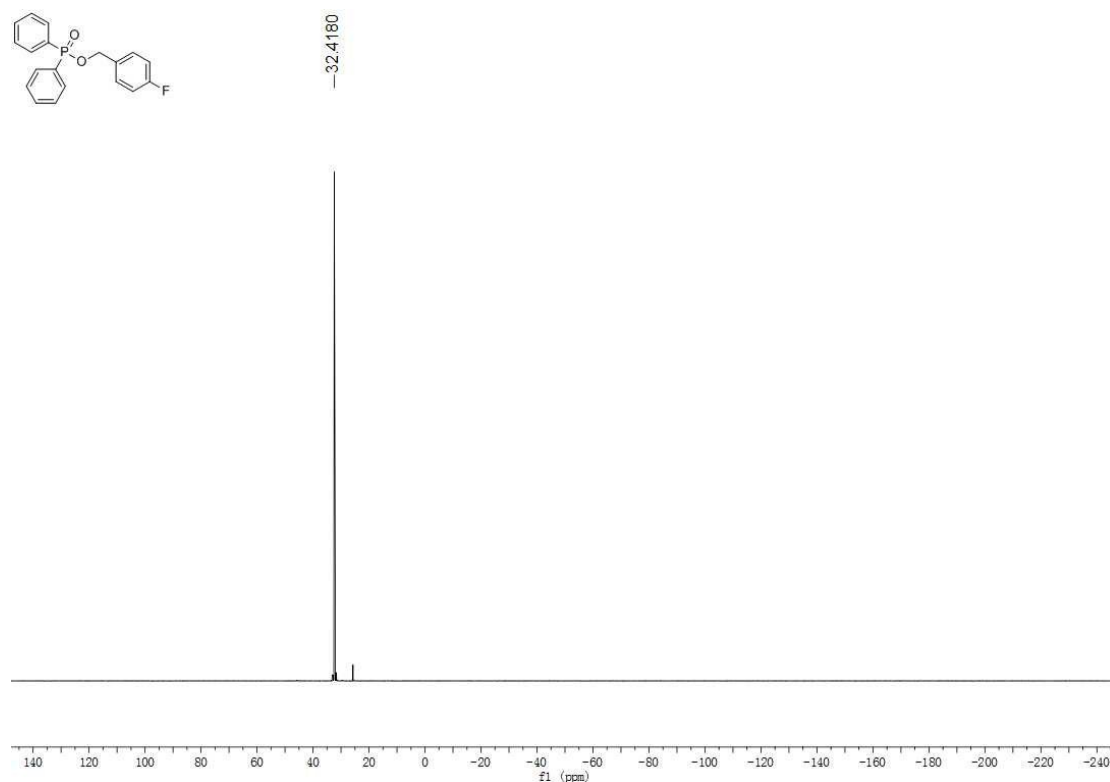

<sup>31</sup>P NMR (162MHz, CDCl<sub>3</sub>) spectrum of compound **3f**

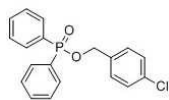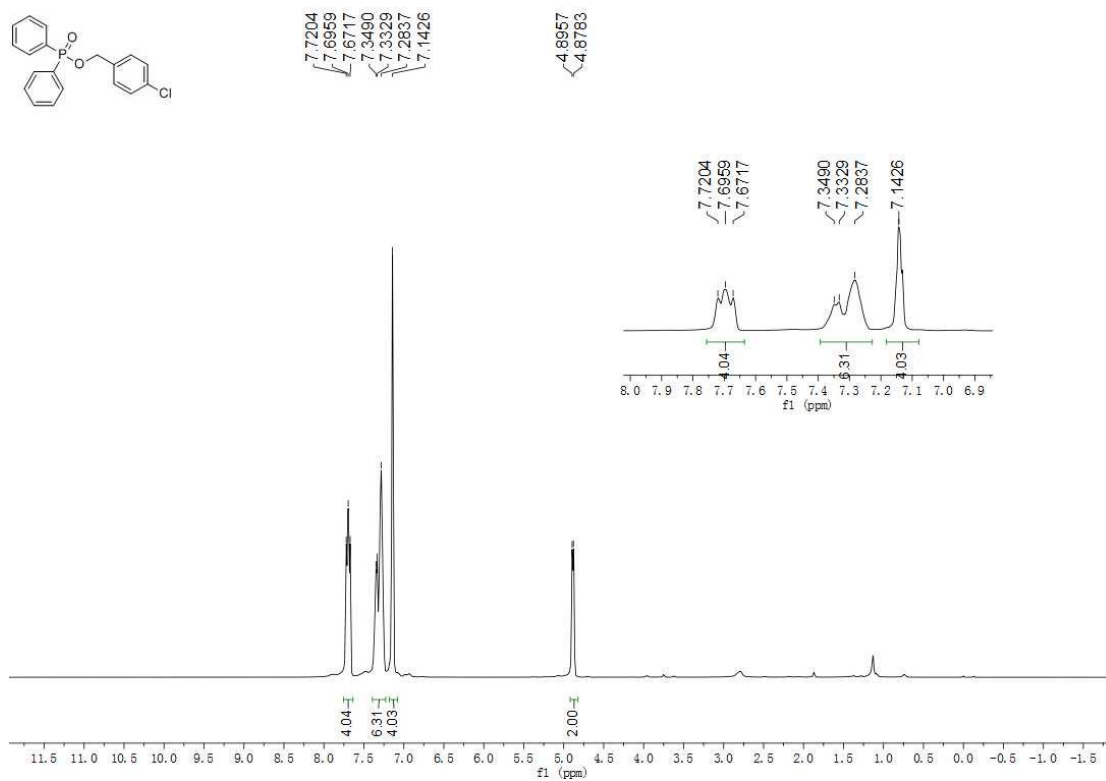

$^1\text{H}$  NMR (400MHz,  $\text{CDCl}_3$ ) spectrum of compound **3g**

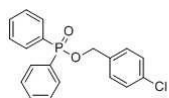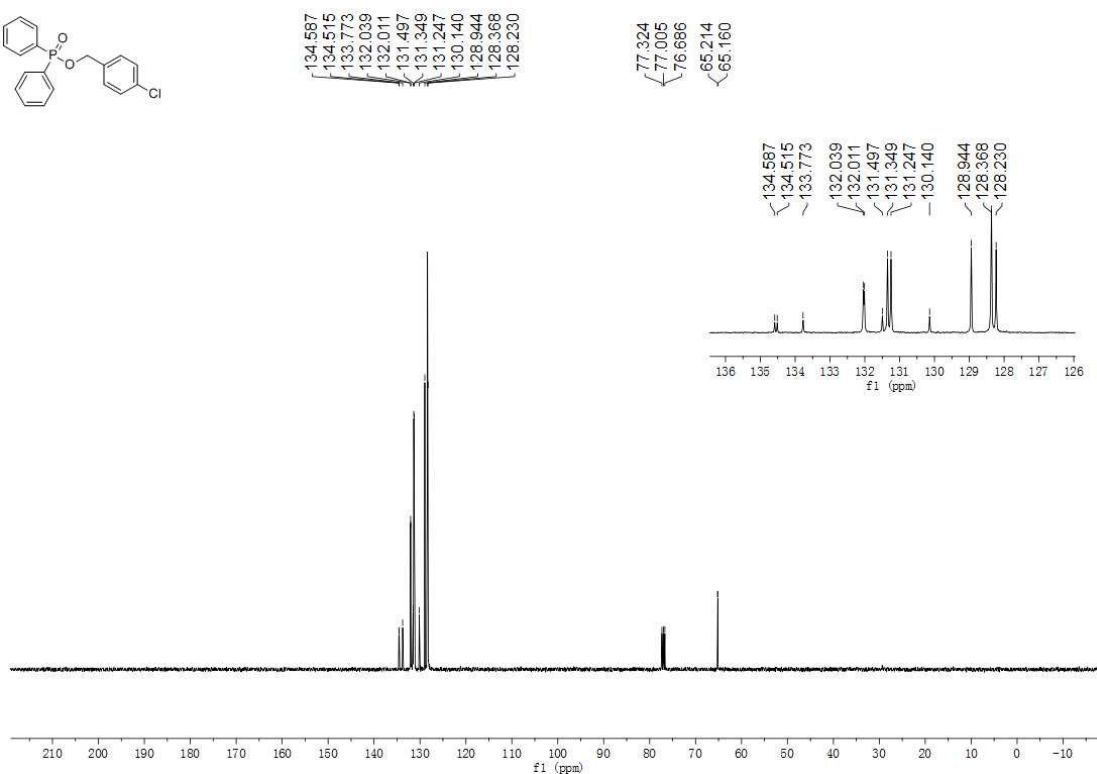

$^{13}\text{C}$  NMR (100MHz,  $\text{CDCl}_3$ ) spectrum of compound **3g**



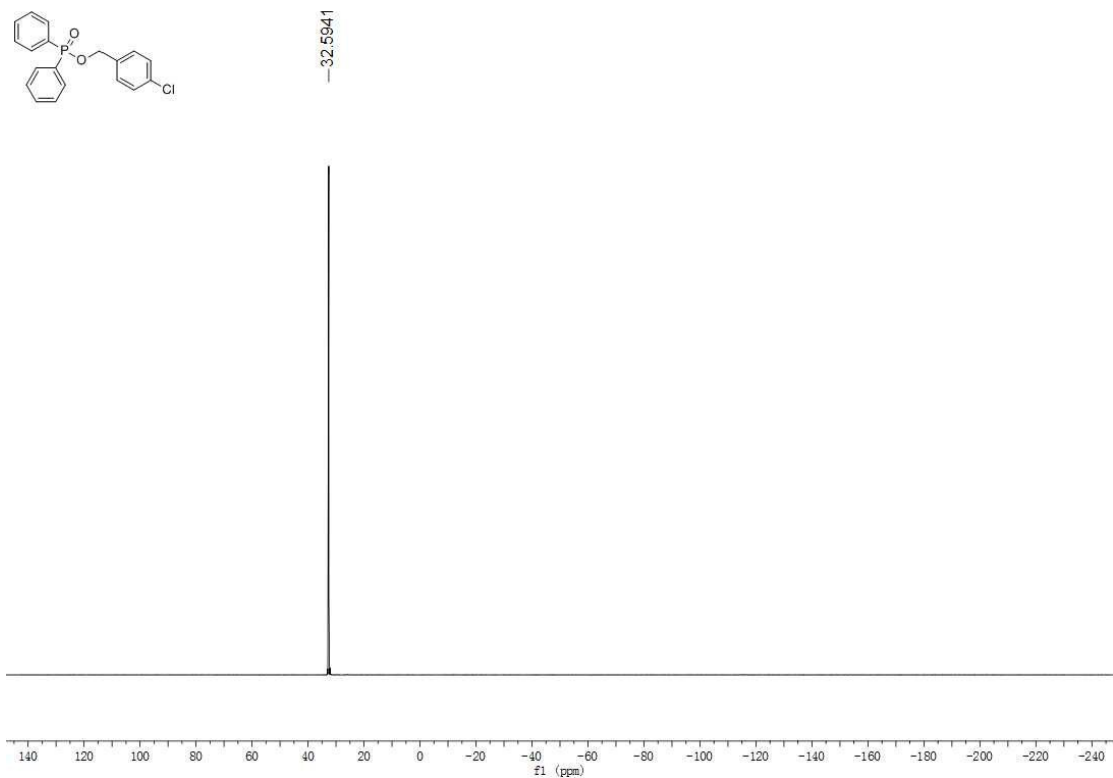

$^{31}\text{P}$  NMR (162MHz,  $\text{CDCl}_3$ ) spectrum of compound **3g**

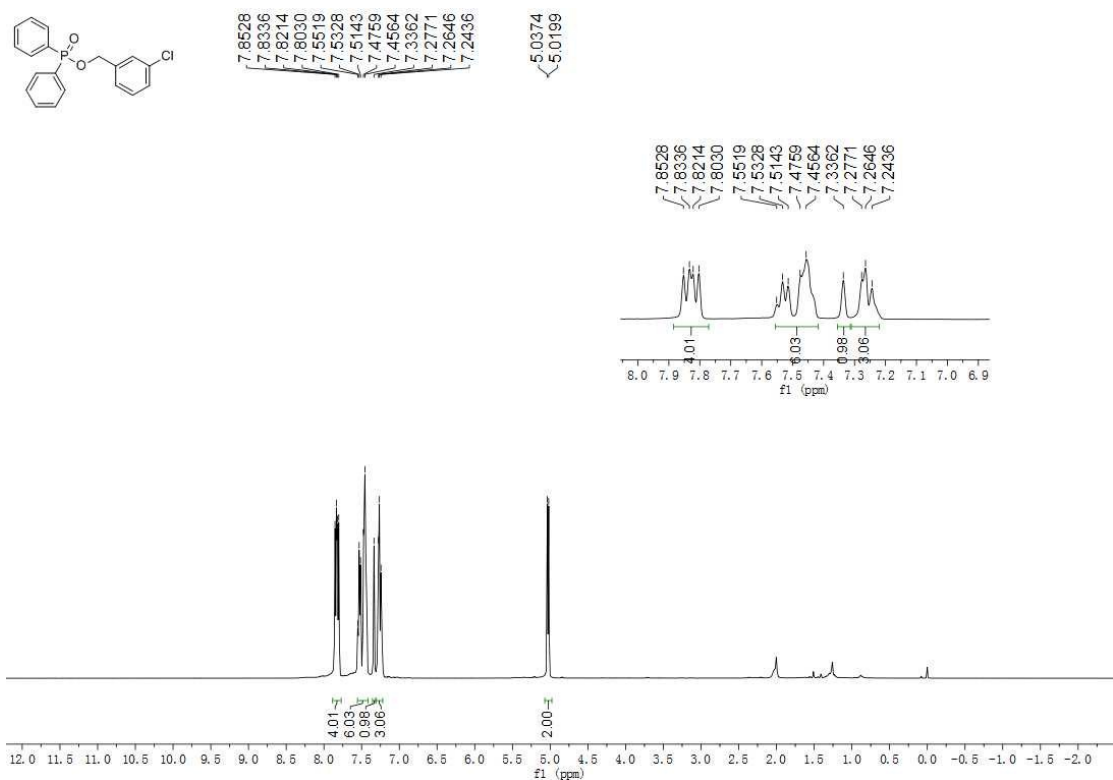

$^1\text{H}$  NMR (400MHz,  $\text{CDCl}_3$ ) spectrum of compound **3h**

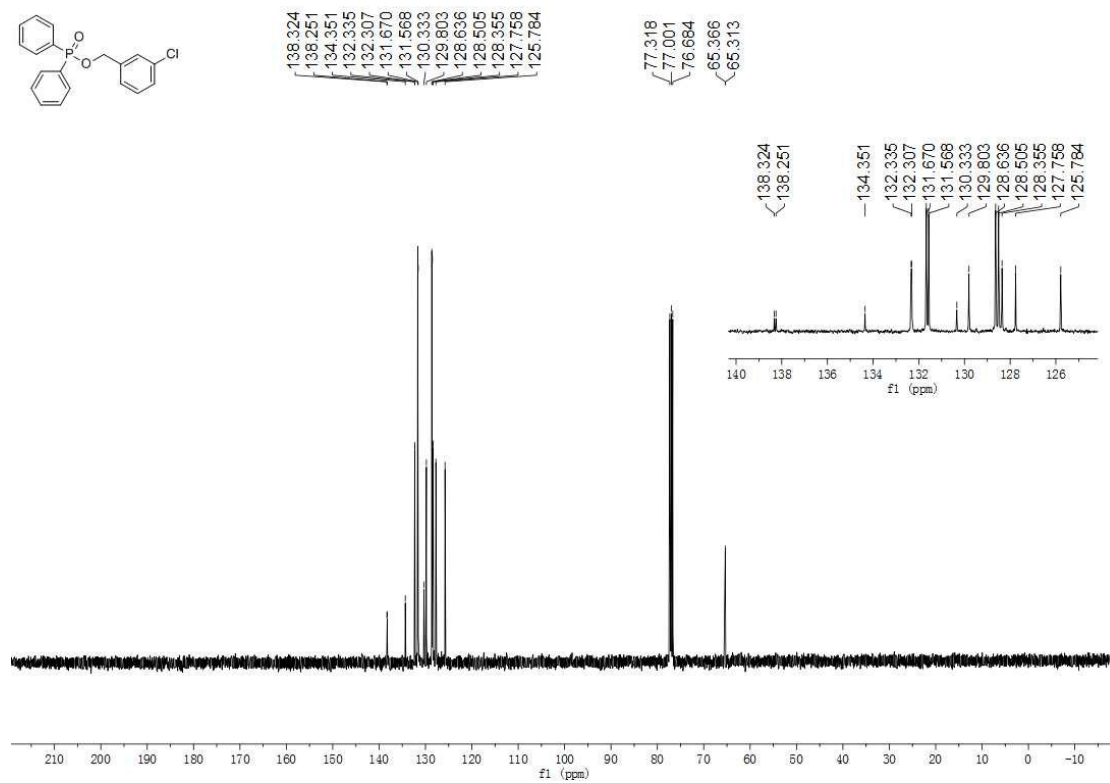

$^{13}\text{C}$  NMR (100MHz,  $\text{CDCl}_3$ ) spectrum of compound **3h**

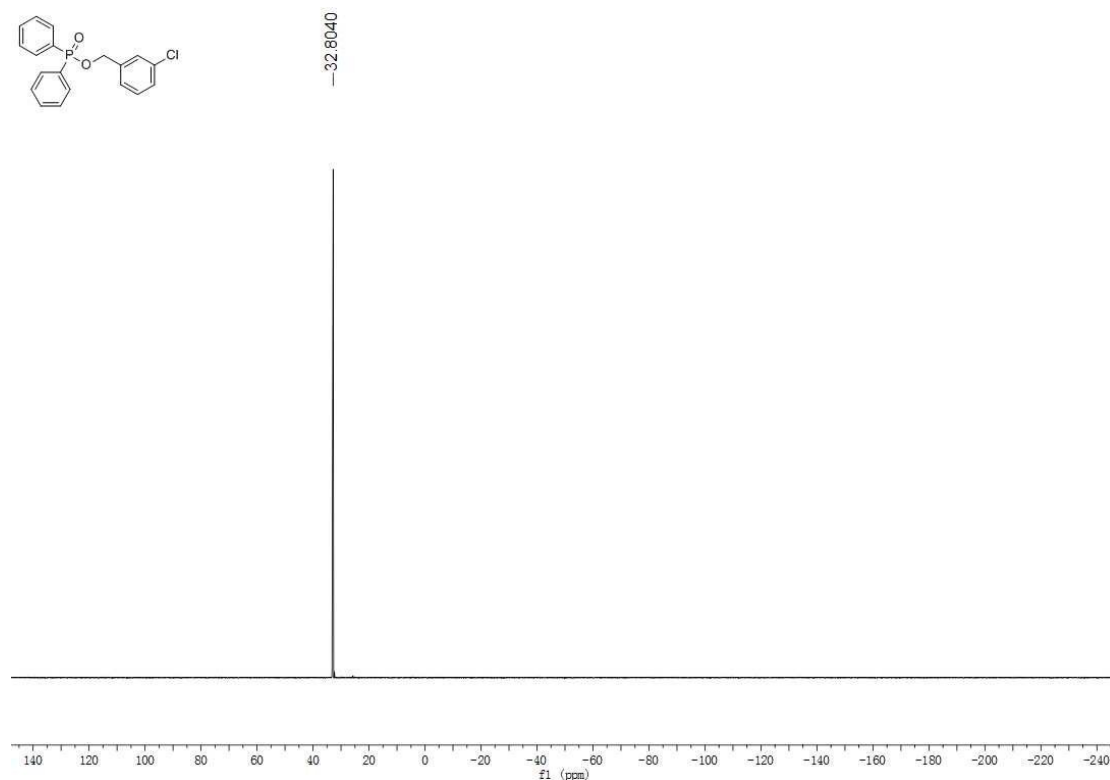

$^{31}\text{P}$  NMR (162MHz,  $\text{CDCl}_3$ ) spectrum of compound **3h**

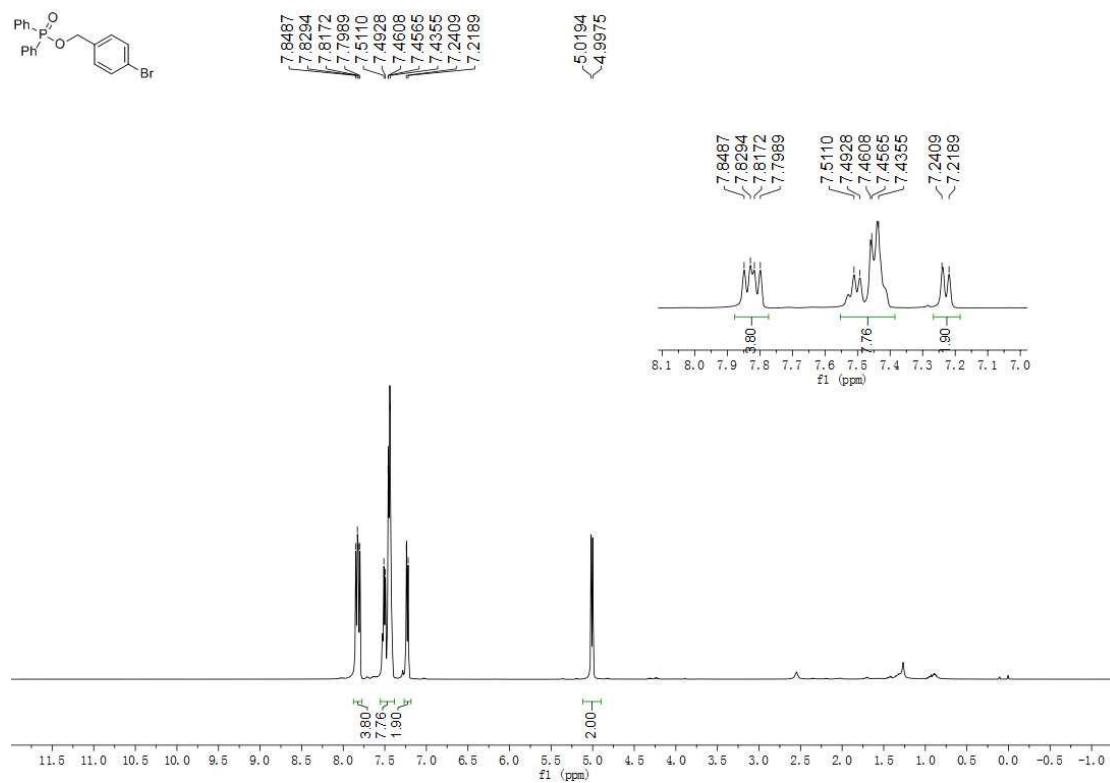

<sup>1</sup>H NMR (400MHz, CDCl<sub>3</sub>) spectrum of compound **3i**

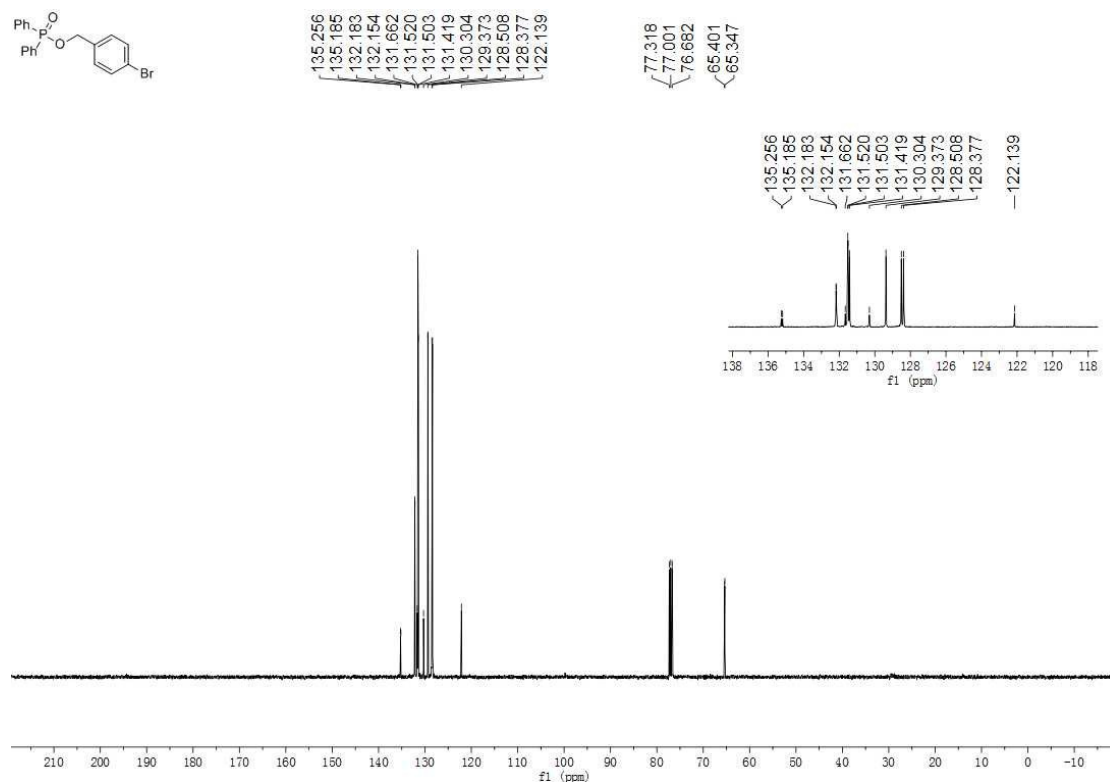

<sup>13</sup>C NMR (100MHz, CDCl<sub>3</sub>) spectrum of compound **3i**

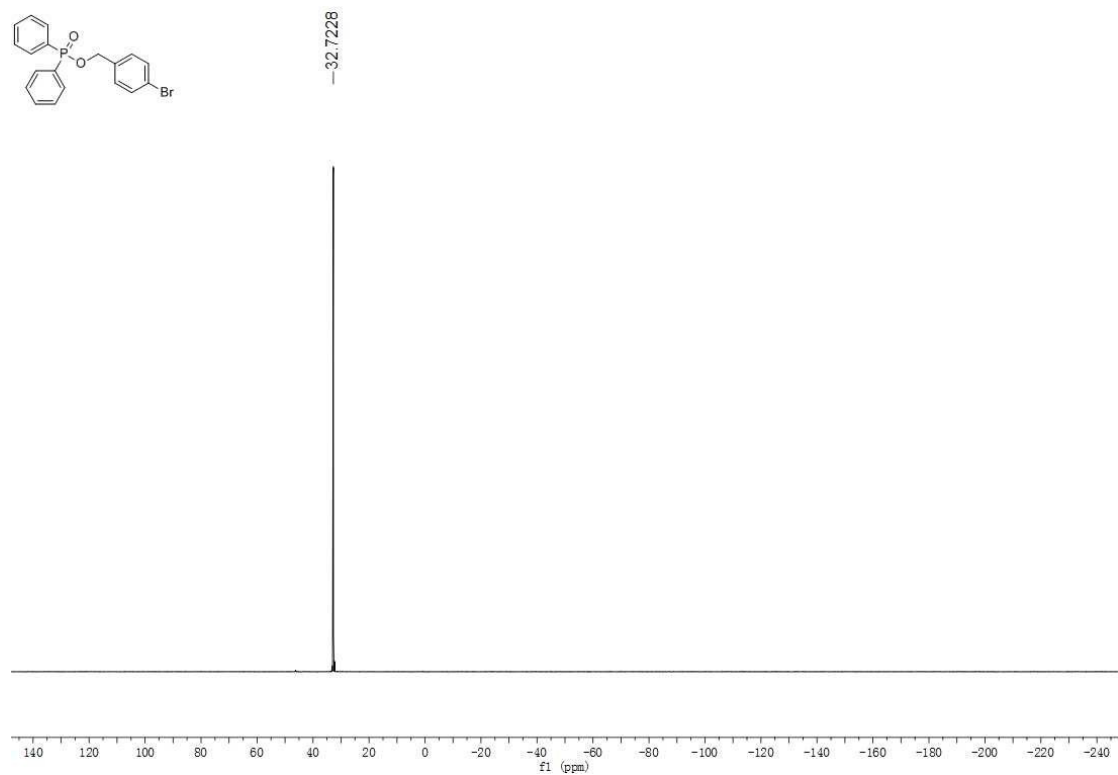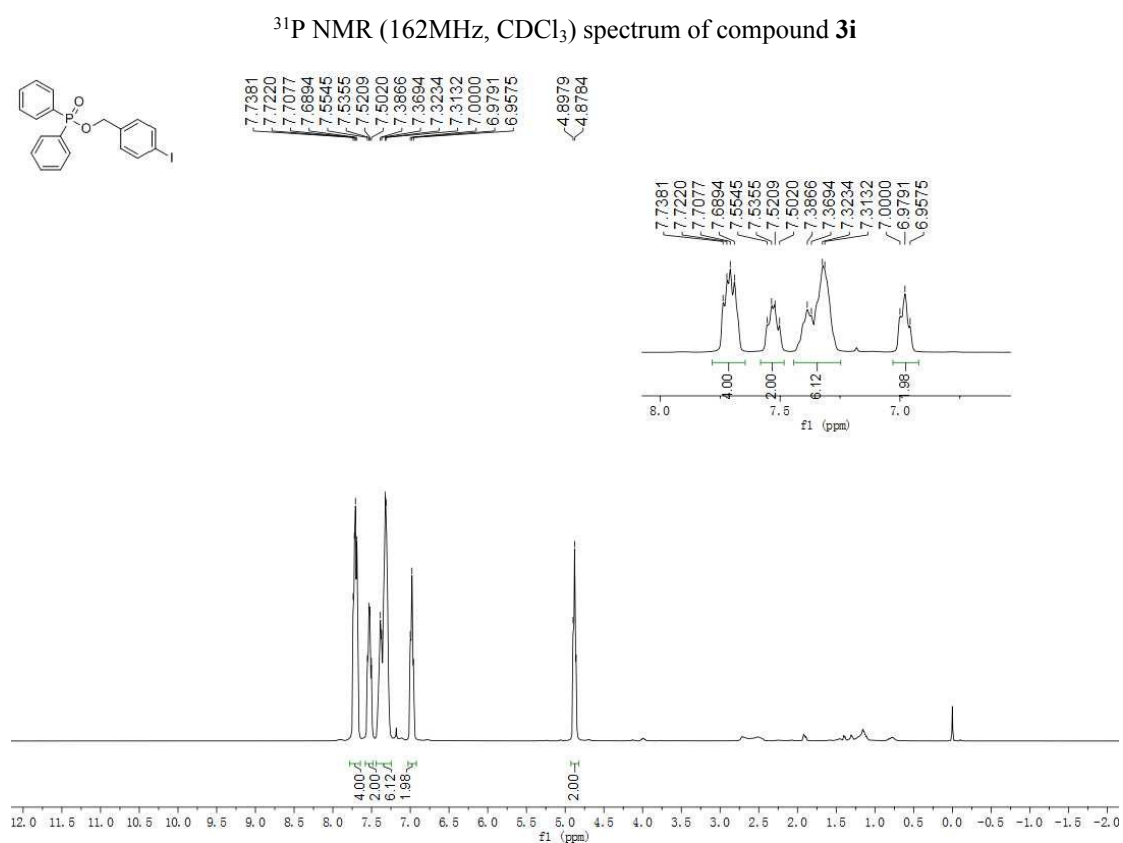

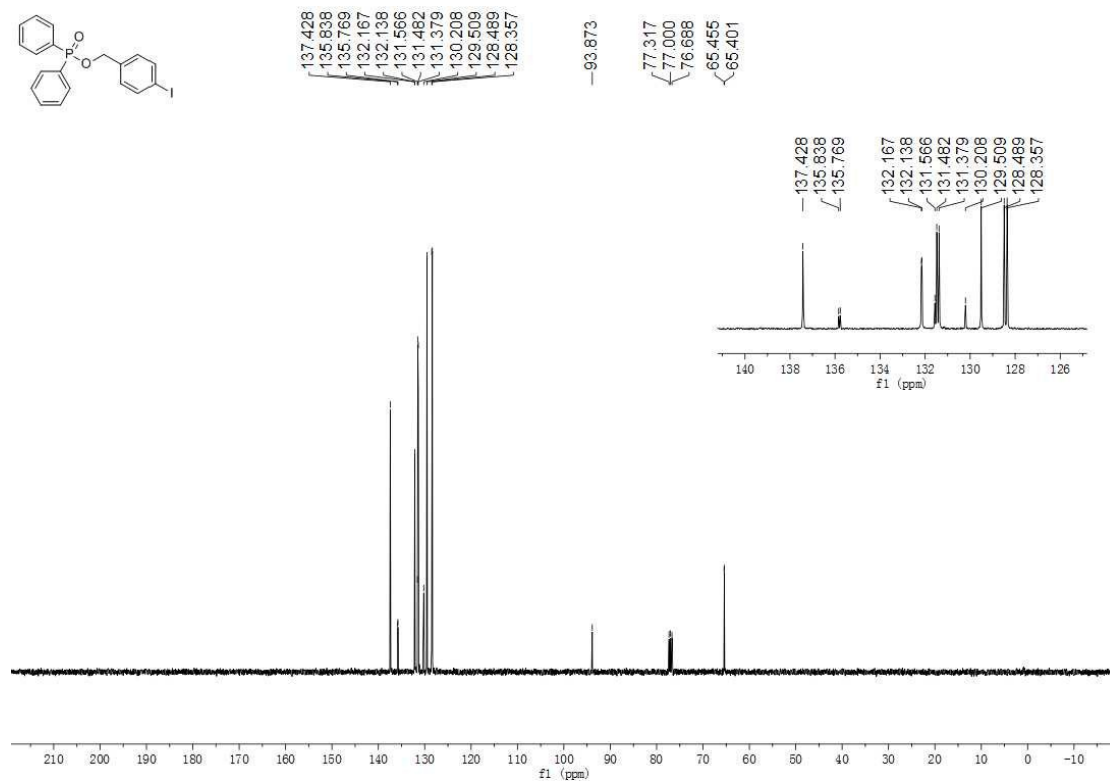

$^{13}\text{C}$  NMR (100MHz,  $\text{CDCl}_3$ ) spectrum of compound **3j**

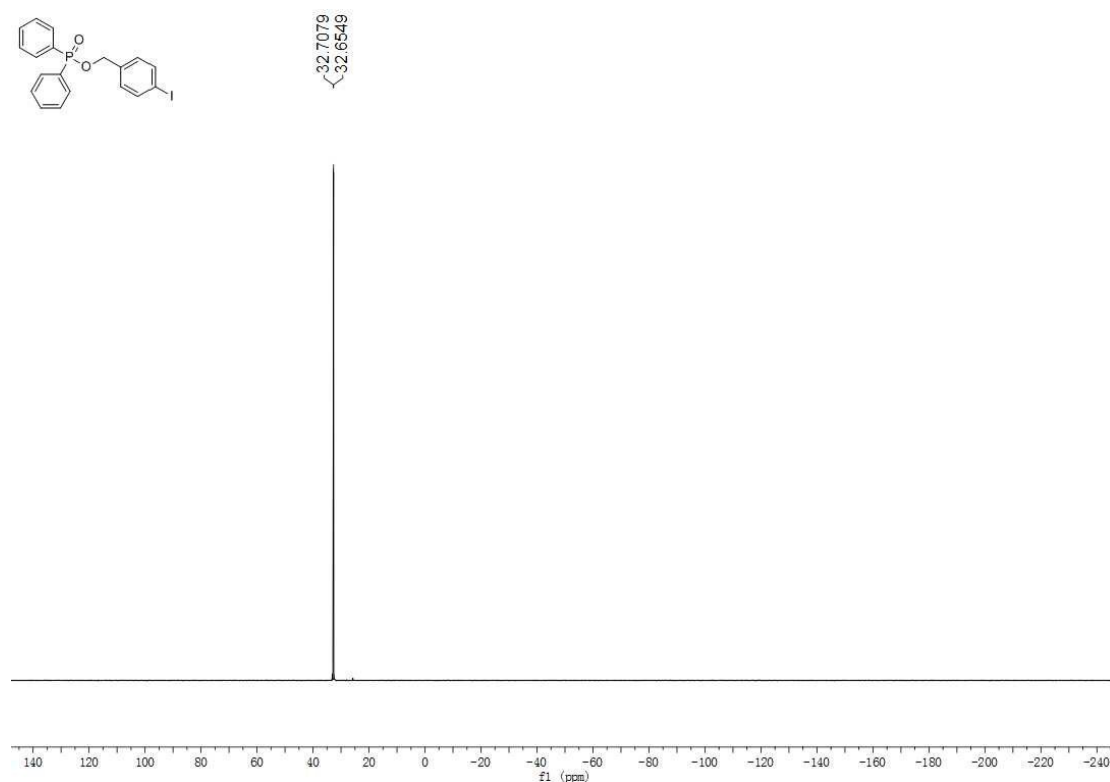

$^{31}\text{P}$  NMR (162MHz,  $\text{CDCl}_3$ ) spectrum of compound **3j**

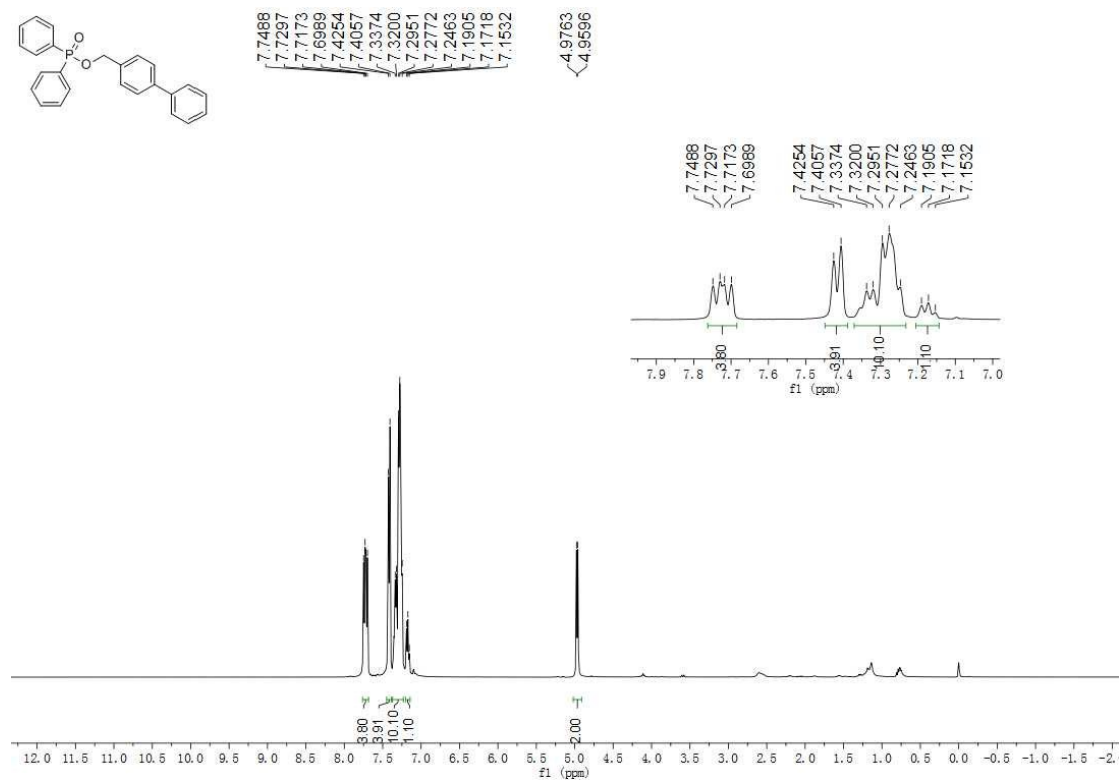

<sup>1</sup>H NMR (400MHz, CDCl<sub>3</sub>) spectrum of compound **3k**

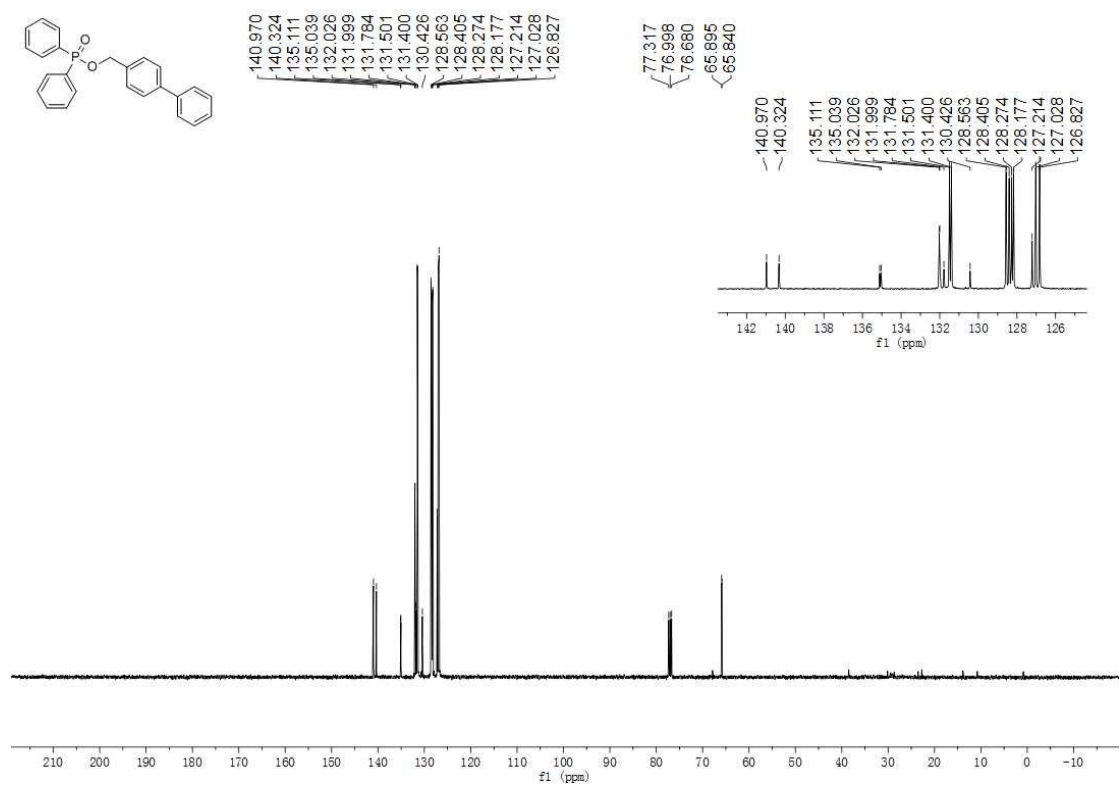

<sup>13</sup>C NMR (100MHz, CDCl<sub>3</sub>) spectrum of compound **3k**

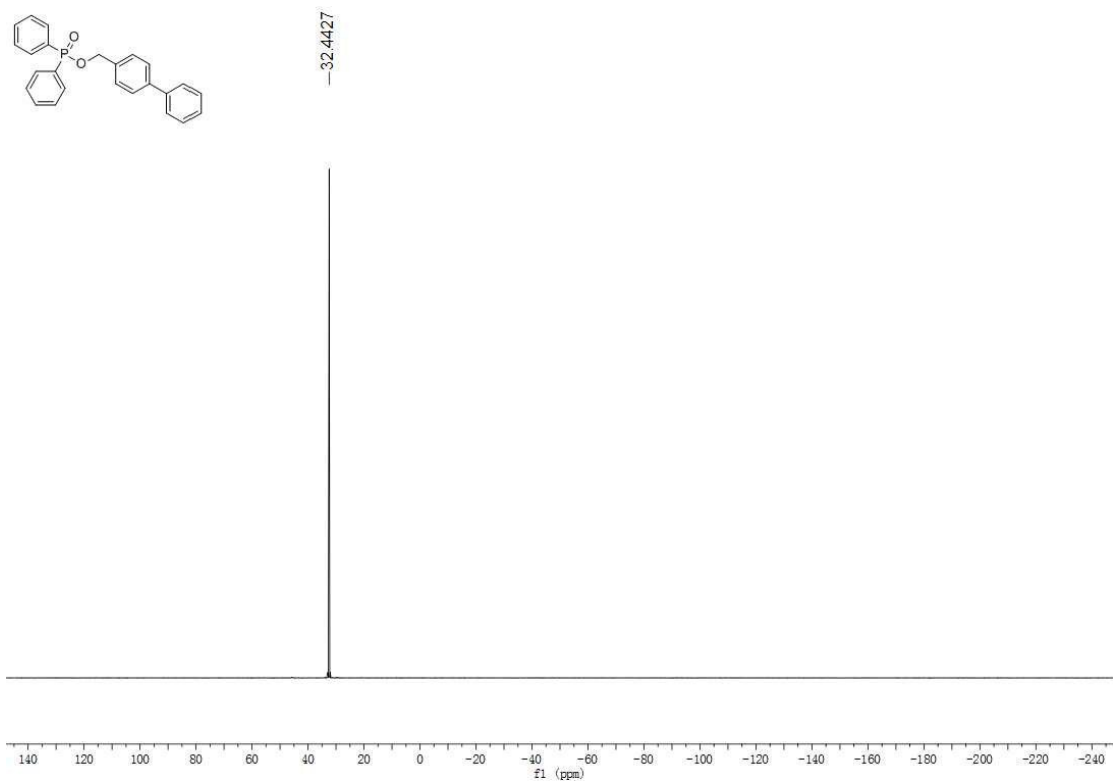

$^{31}\text{P}$  NMR (162MHz,  $\text{CDCl}_3$ ) spectrum of compound **3k**

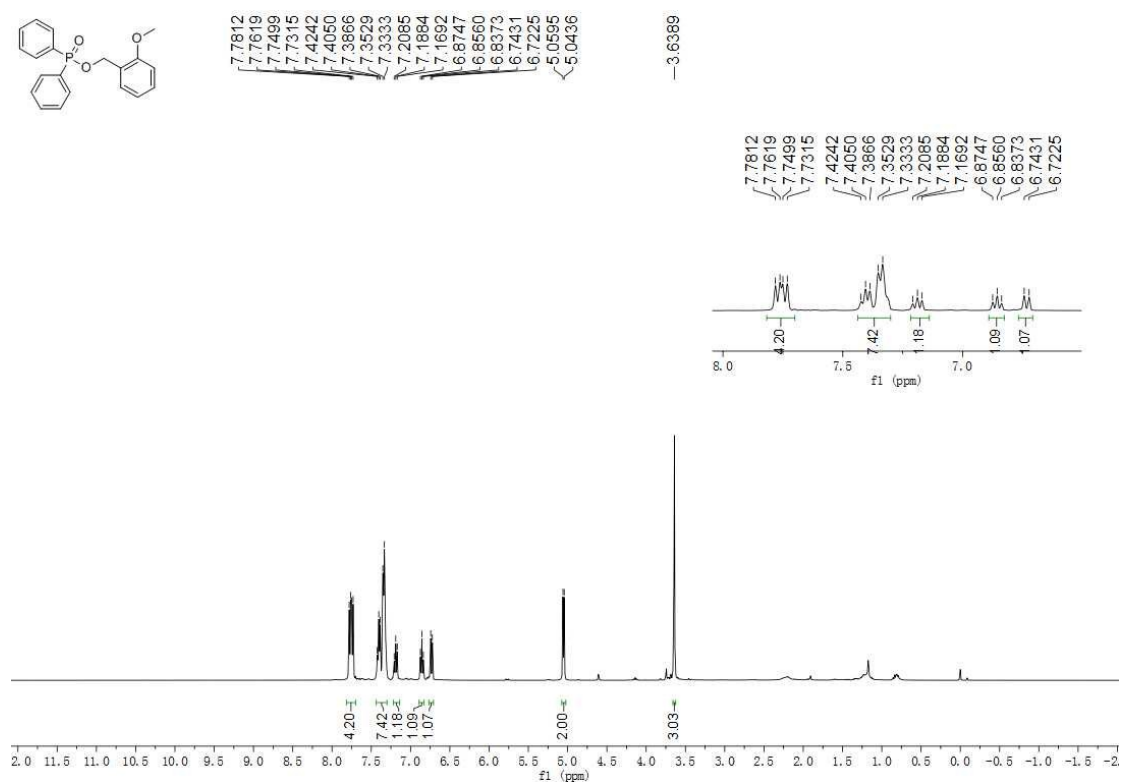

$^1\text{H}$  NMR (400MHz,  $\text{CDCl}_3$ ) spectrum of compound **3l**

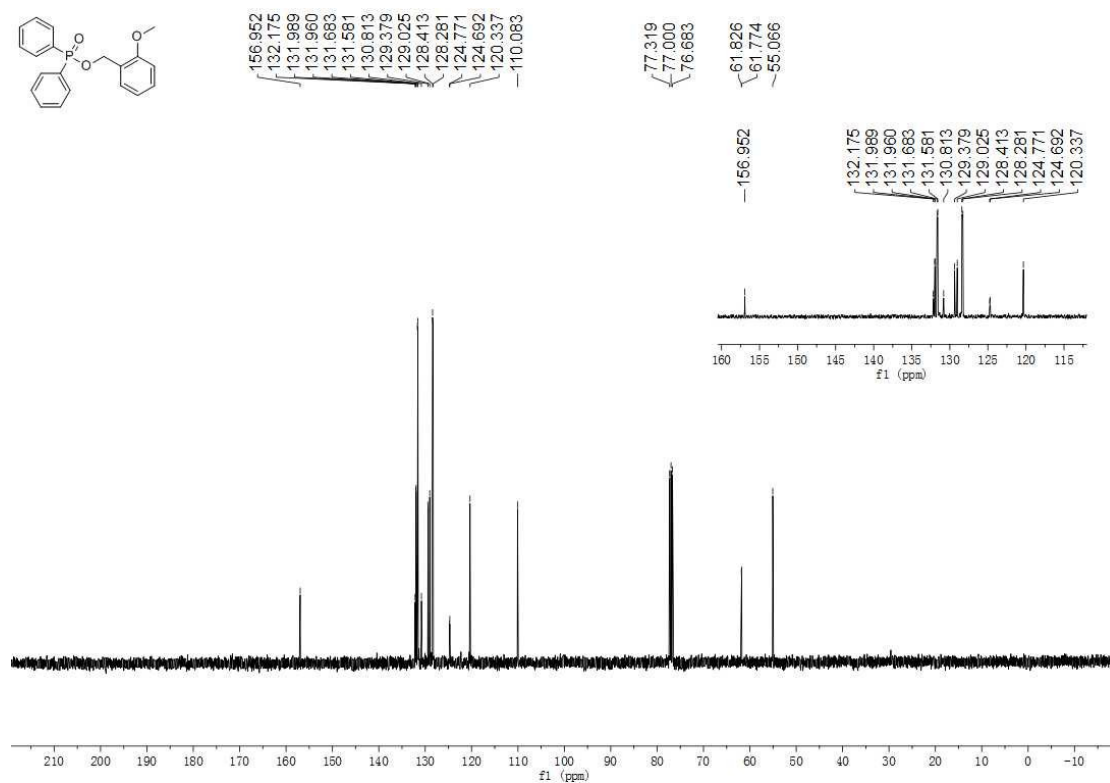

$^{13}\text{C}$  NMR (100MHz,  $\text{CDCl}_3$ ) spectrum of compound 31

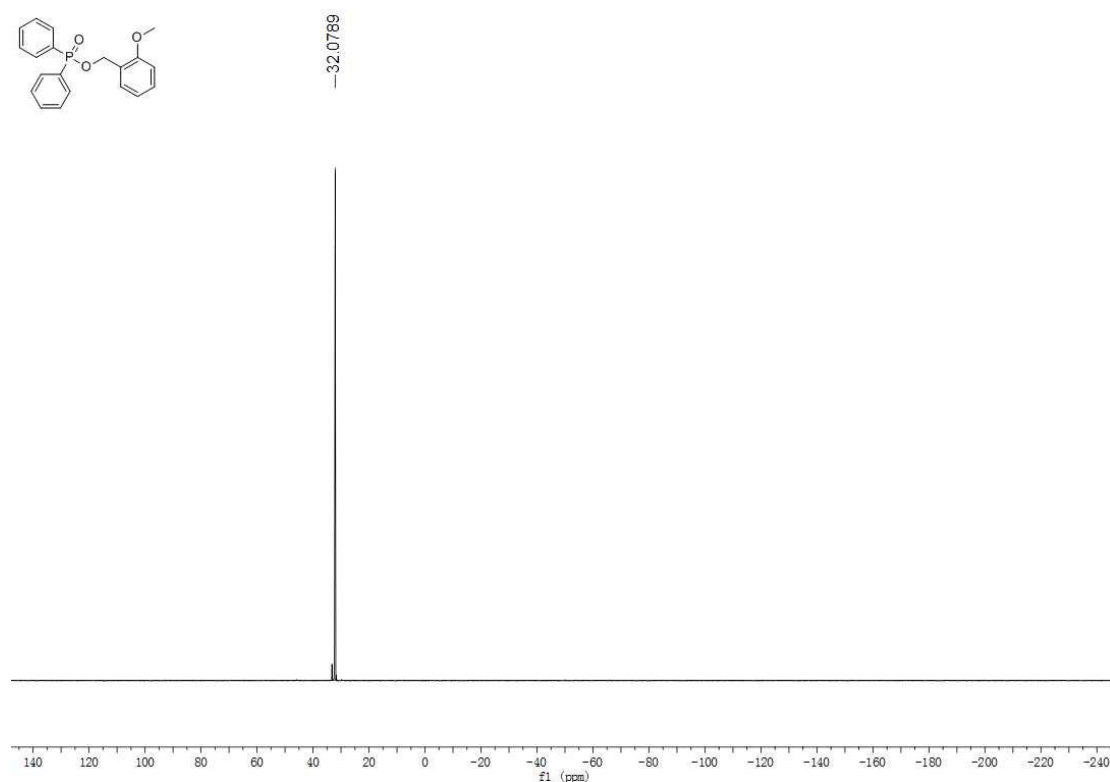

$^{31}\text{P}$  NMR (162MHz,  $\text{CDCl}_3$ ) spectrum of compound 31



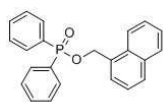

7.9817  
7.9614  
7.7152  
7.6959  
7.6816  
7.6624  
7.4066  
7.3889  
7.3685  
7.3486  
7.3326  
7.3147  
7.2722  
7.2629  
7.2523  
7.2445  
7.2312  
7.2255  
5.4136  
5.3972

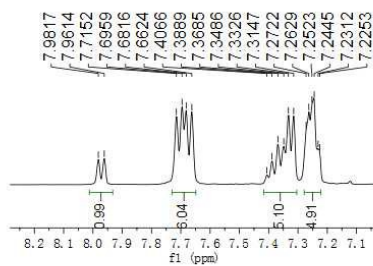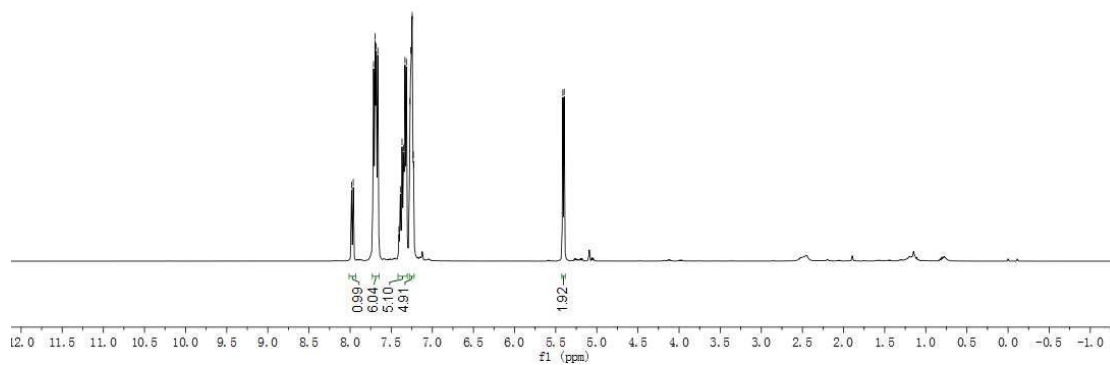

<sup>1</sup>H NMR (400MHz, CDCl<sub>3</sub>) spectrum of compound **3m**

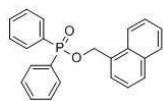

133.476  
132.067  
132.040  
131.813  
131.887  
131.613  
131.613  
131.555  
131.453  
131.224  
130.458  
129.199  
128.456  
128.403  
128.272  
126.748  
126.434  
125.807  
125.030  
123.438

77.321  
77.003  
76.686  
64.592  
64.538

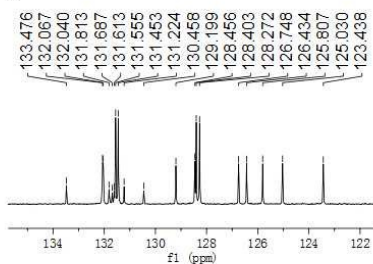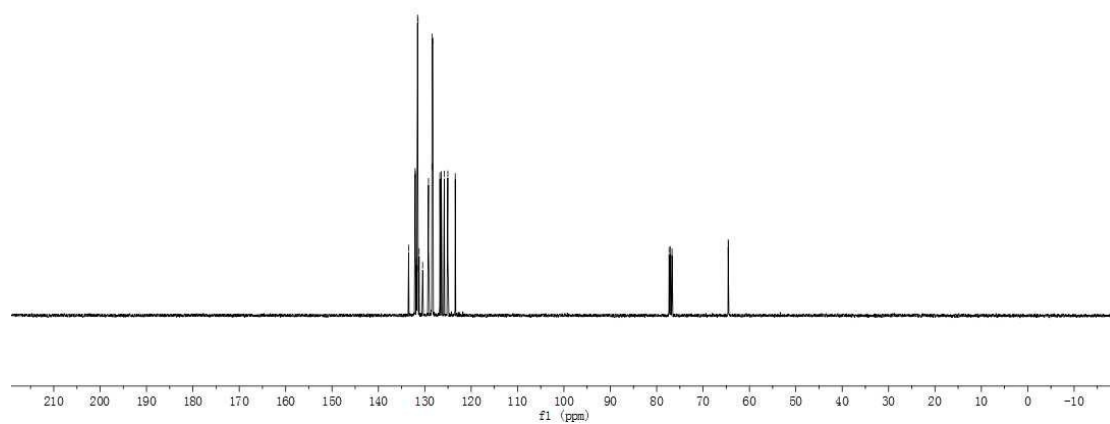

<sup>13</sup>C NMR (100MHz, CDCl<sub>3</sub>) spectrum of compound **3m**

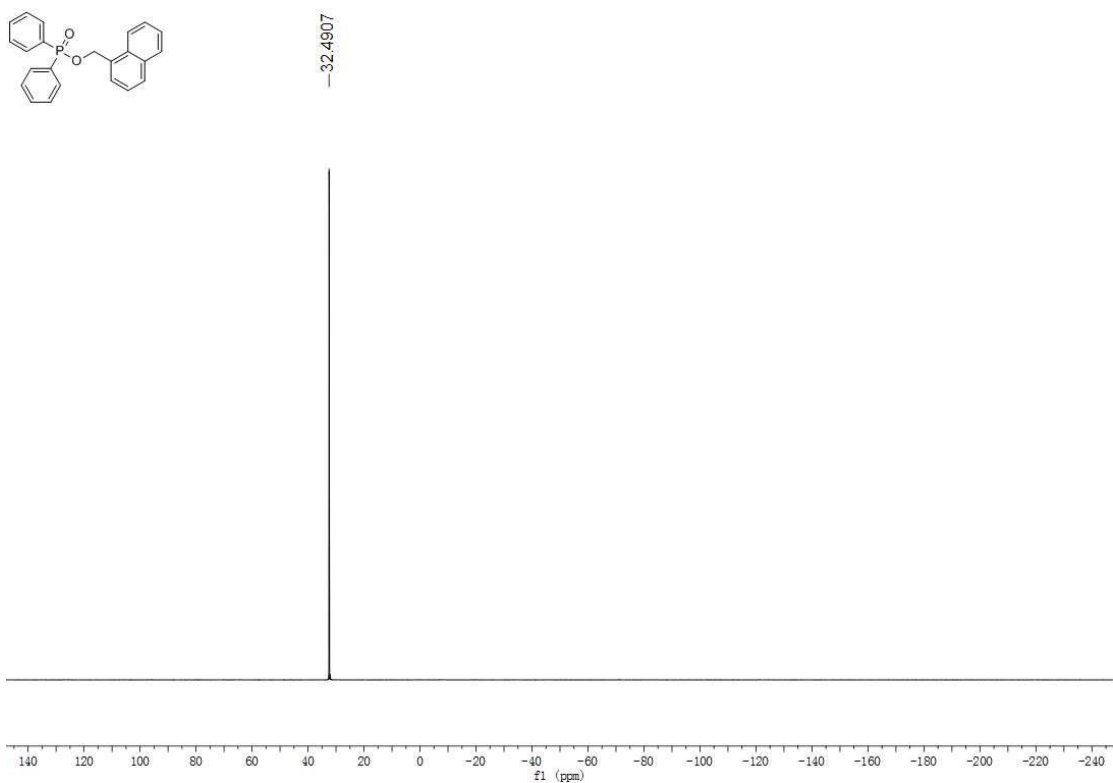

$^{31}\text{P}$  NMR (162MHz,  $\text{CDCl}_3$ ) spectrum of compound **3m**

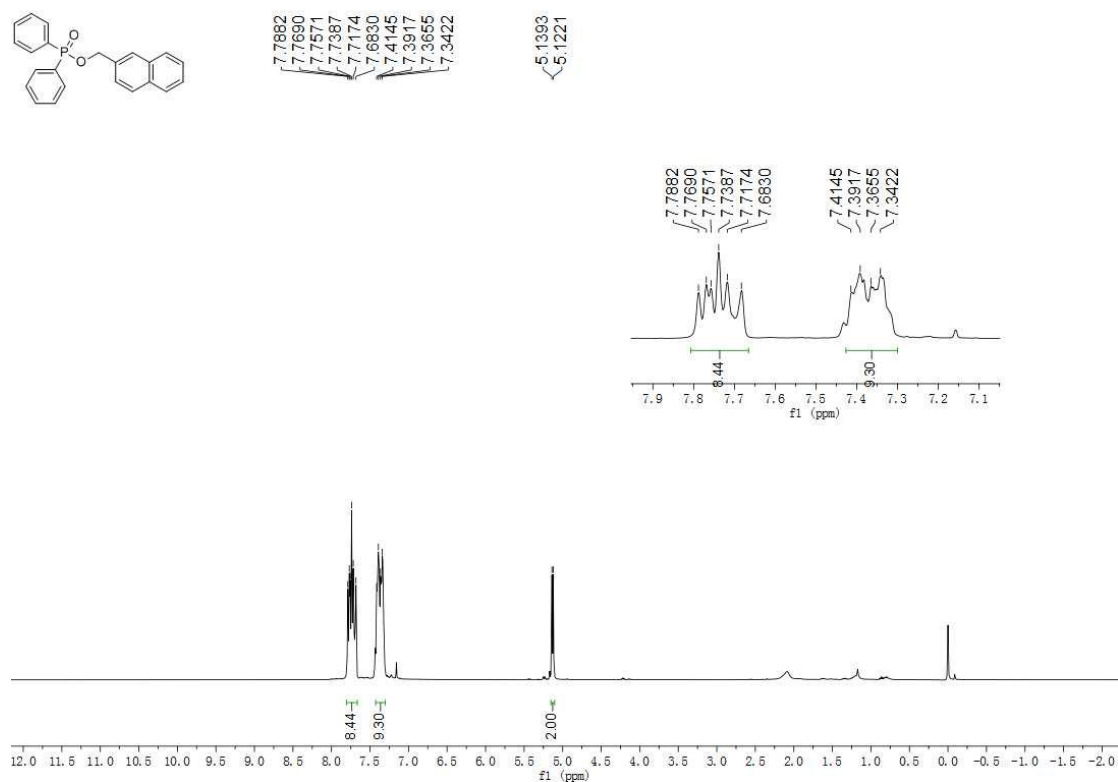

$^1\text{H}$  NMR (400MHz,  $\text{CDCl}_3$ ) spectrum of compound **3m**

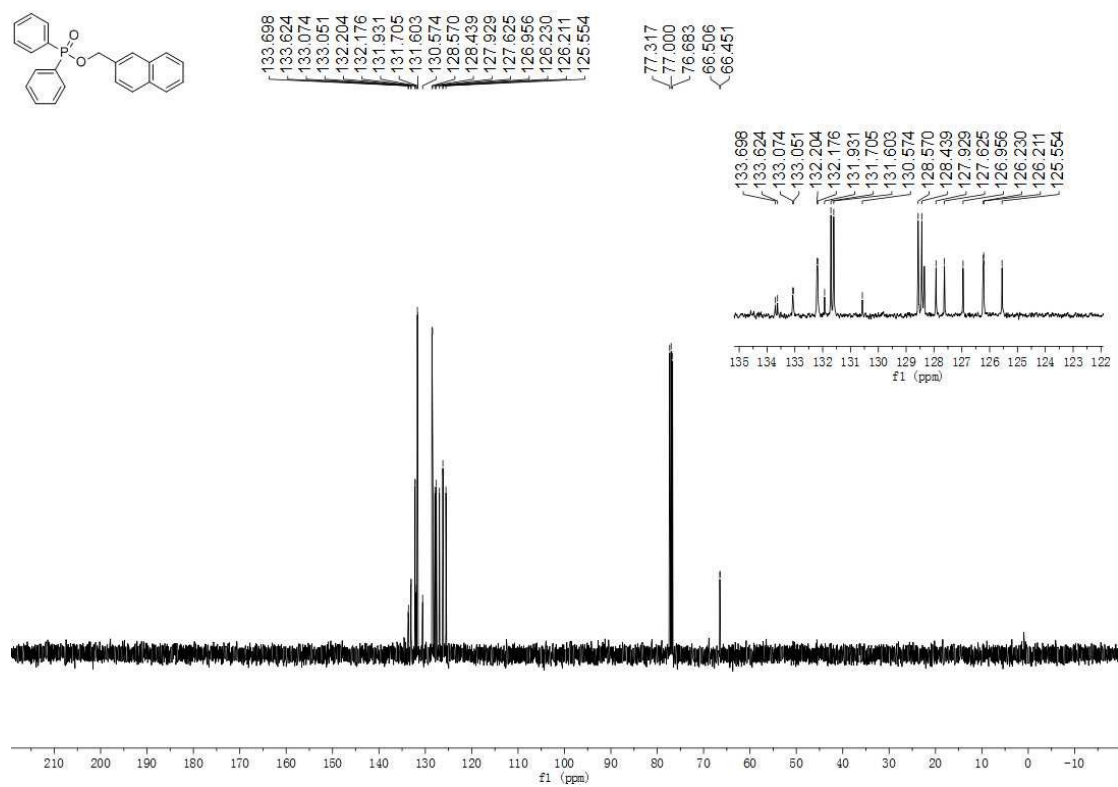

<sup>13</sup>C NMR (100MHz, CDCl<sub>3</sub>) spectrum of compound **3n**

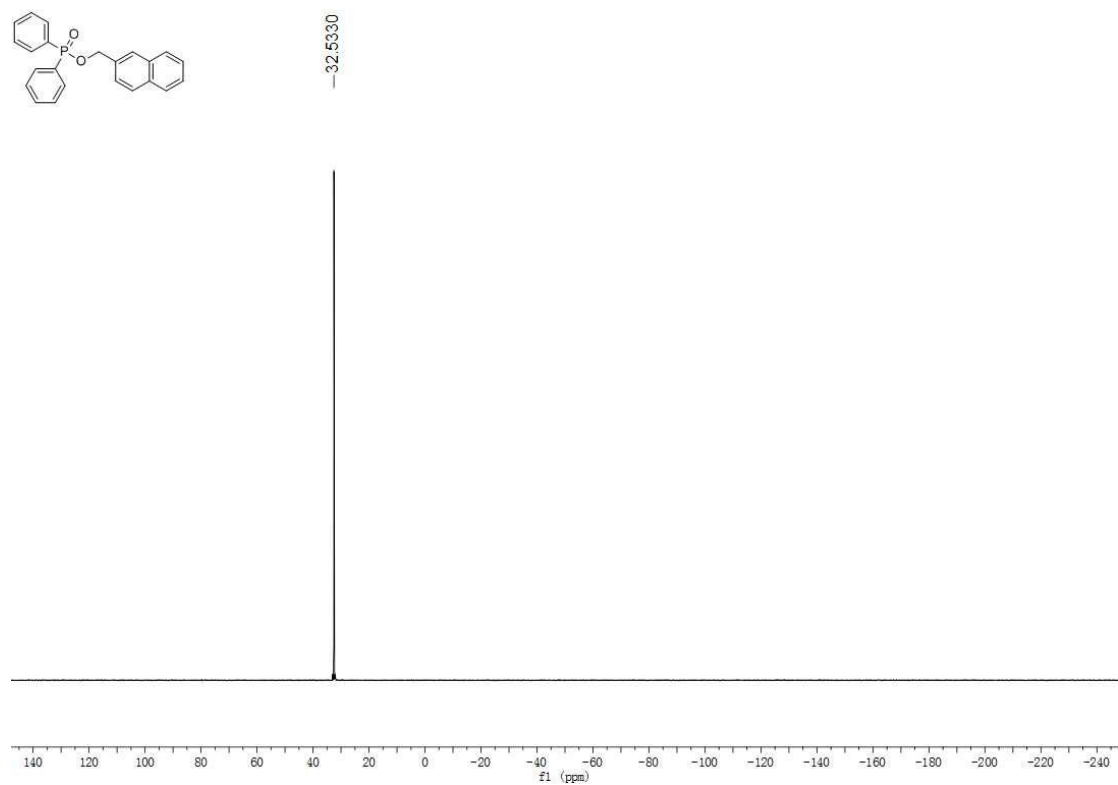

<sup>31</sup>P NMR (162MHz, CDCl<sub>3</sub>) spectrum of compound **3n**

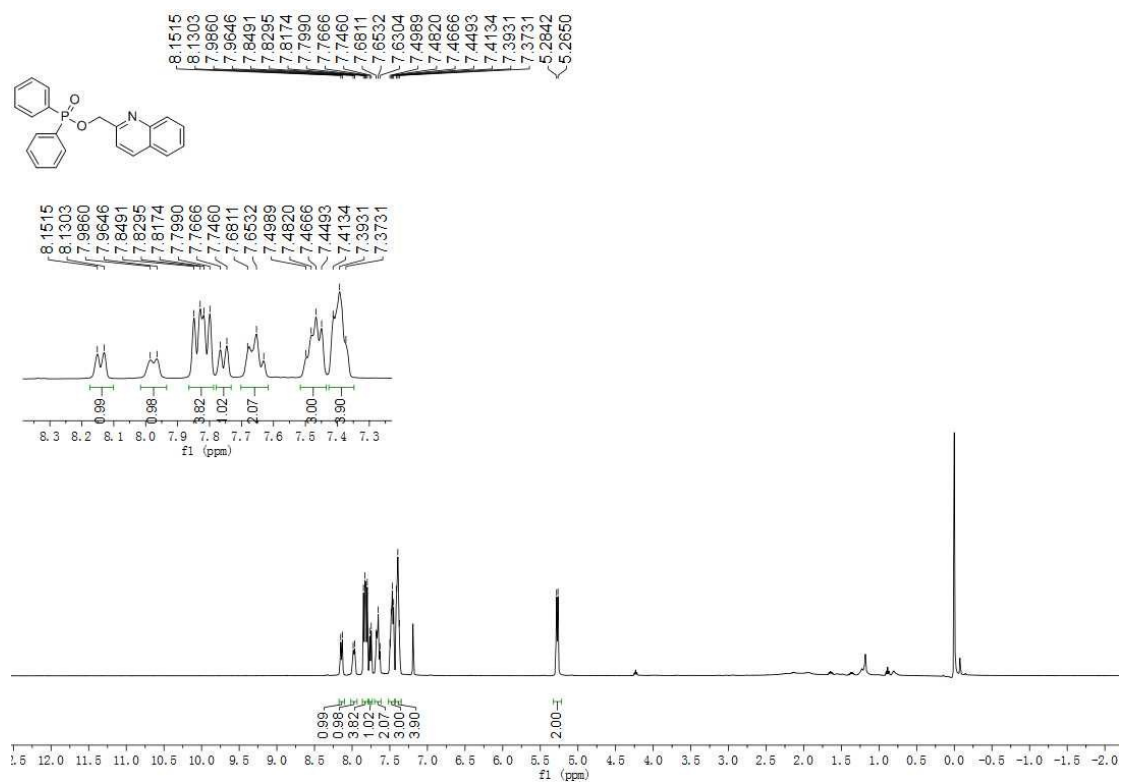

**<sup>1</sup>H NMR (400MHz, CDCl<sub>3</sub>) spectrum of compound 3o**

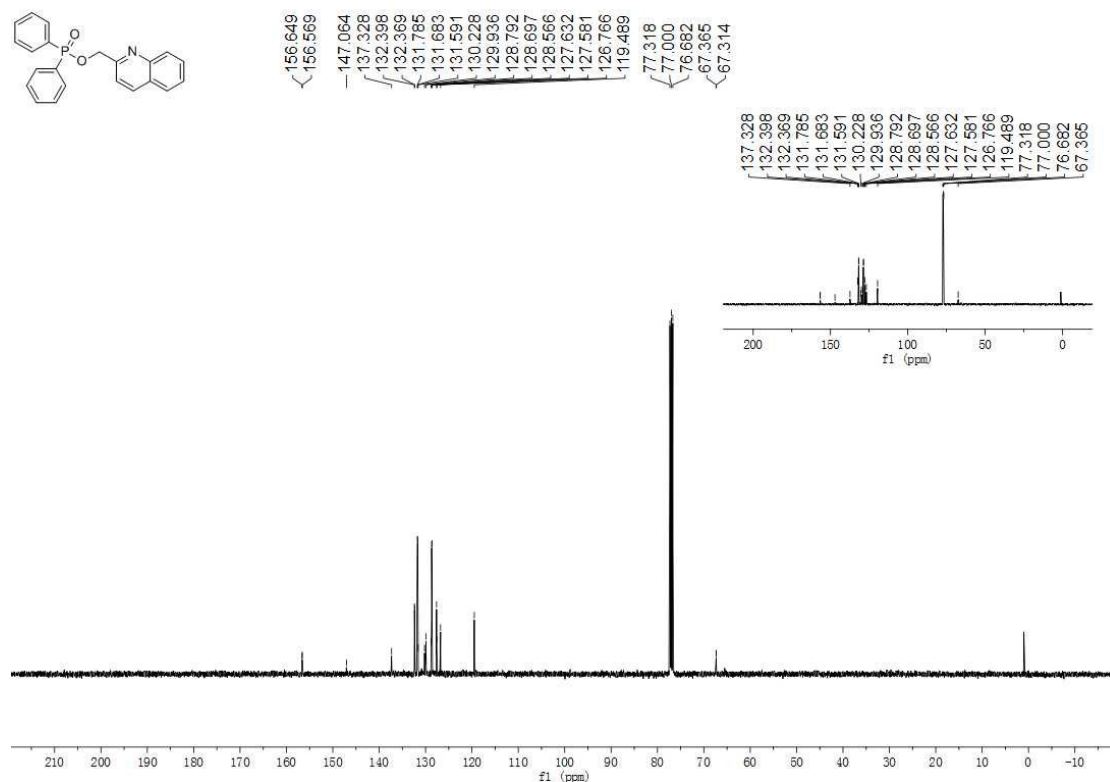

**<sup>13</sup>C NMR (100MHz, CDCl<sub>3</sub>) spectrum of compound 3o**

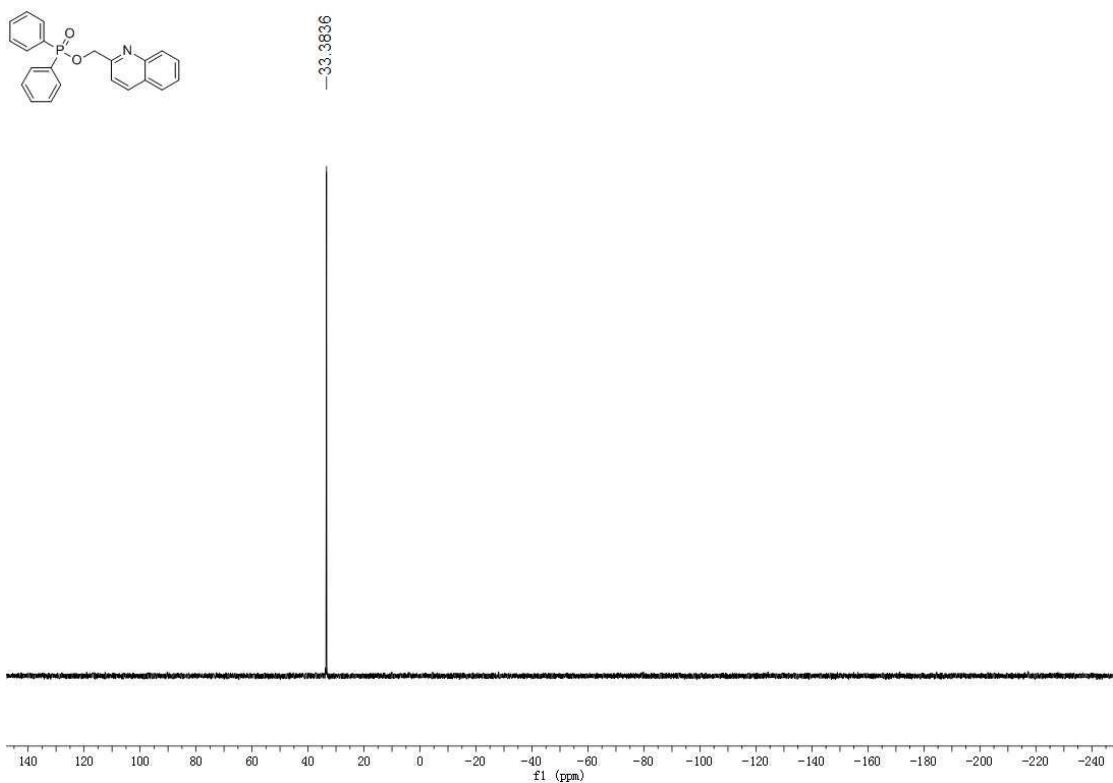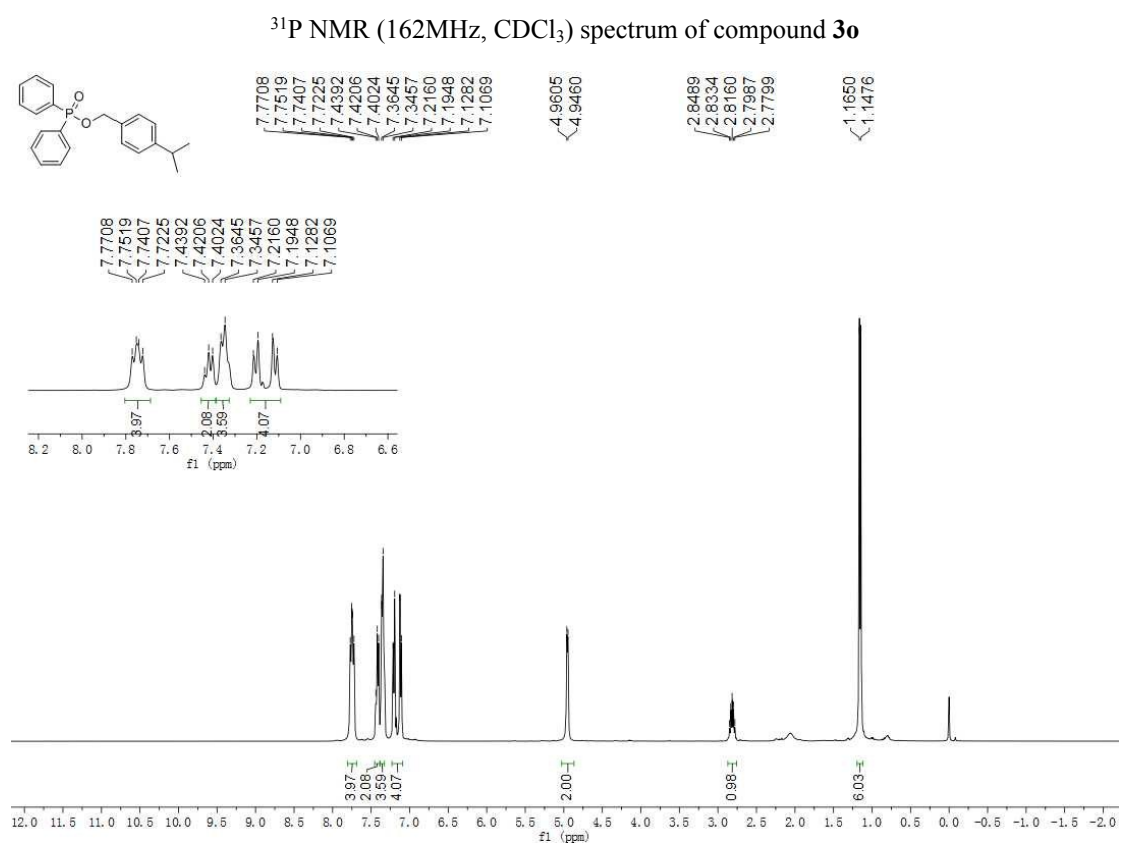

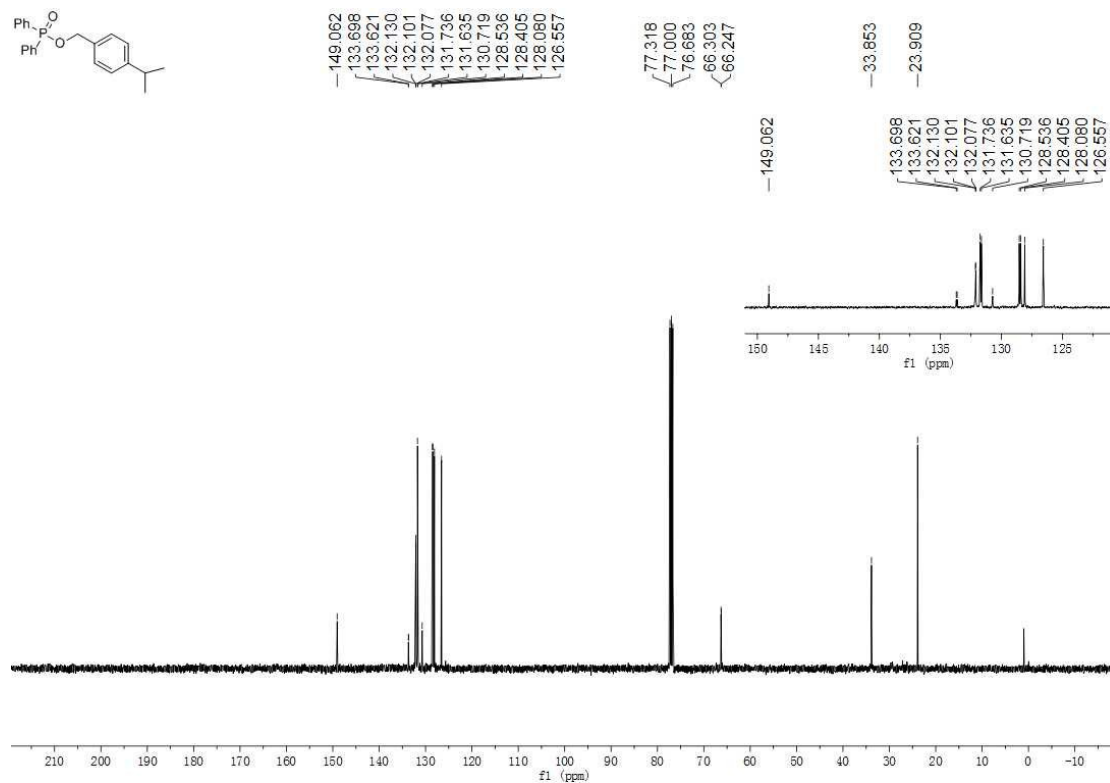

$^{13}\text{C}$  NMR (100MHz,  $\text{CDCl}_3$ ) spectrum of compound **3p**

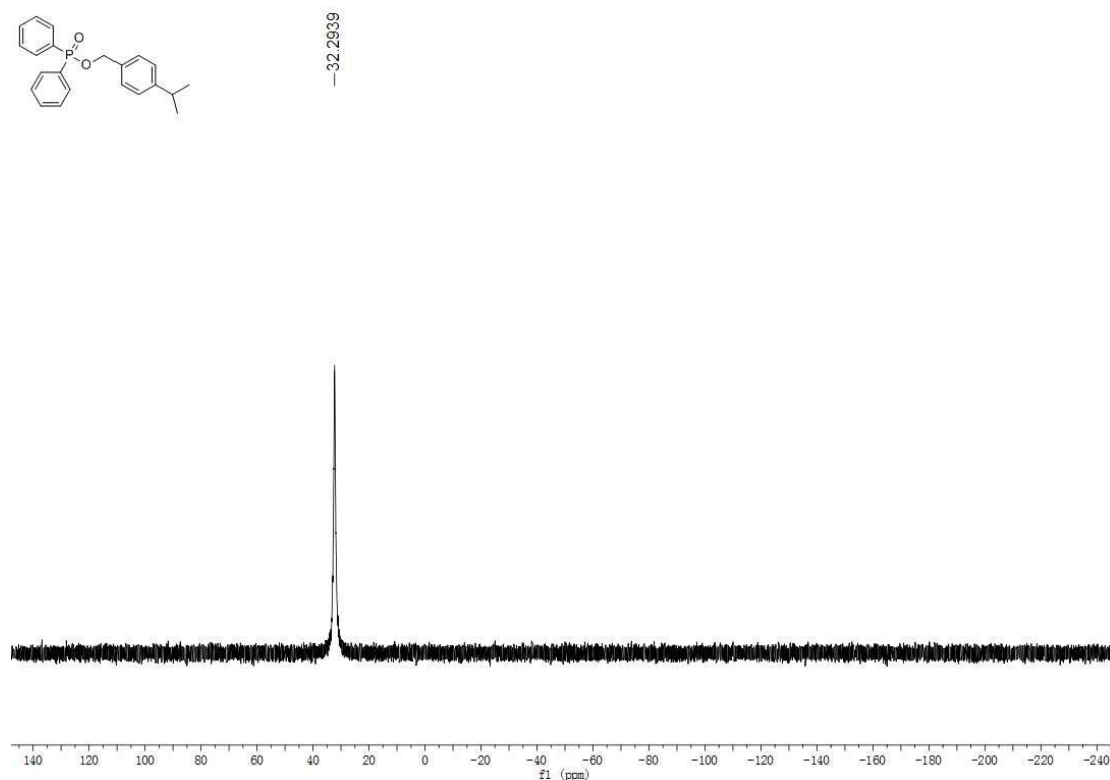

$^{31}\text{P}$  NMR (162MHz,  $\text{CDCl}_3$ ) spectrum of compound **3p**

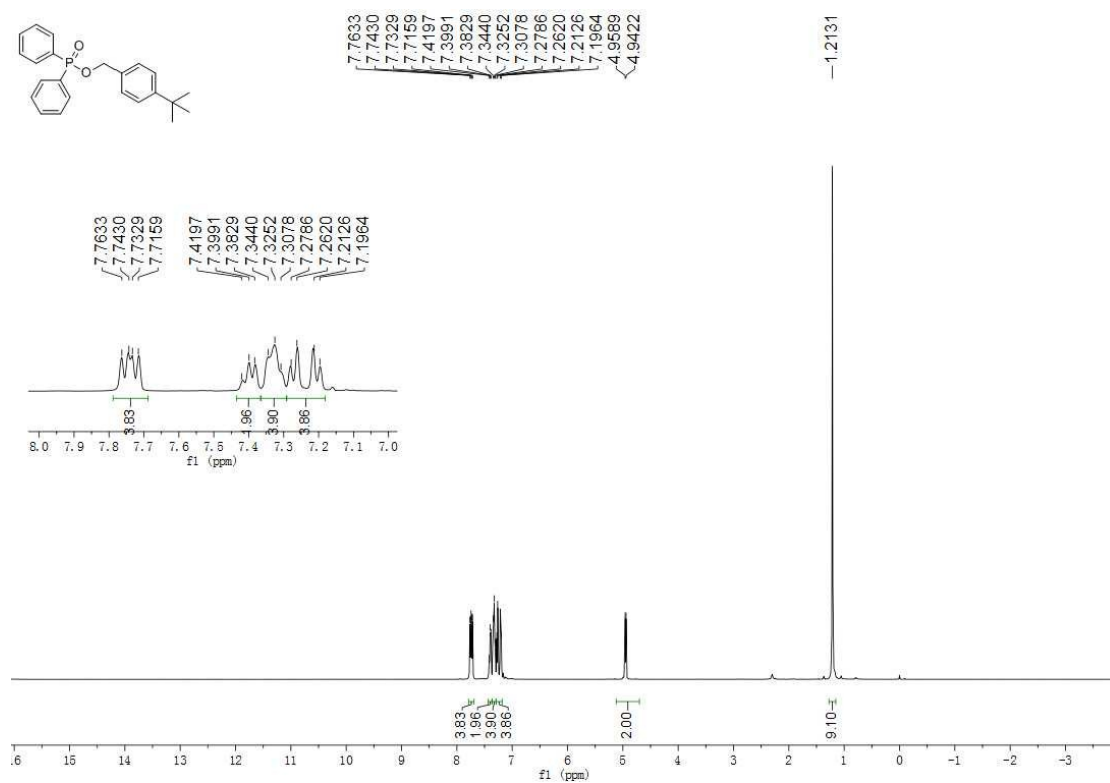

<sup>1</sup>H NMR (400MHz, CDCl<sub>3</sub>) spectrum of compound **3q**

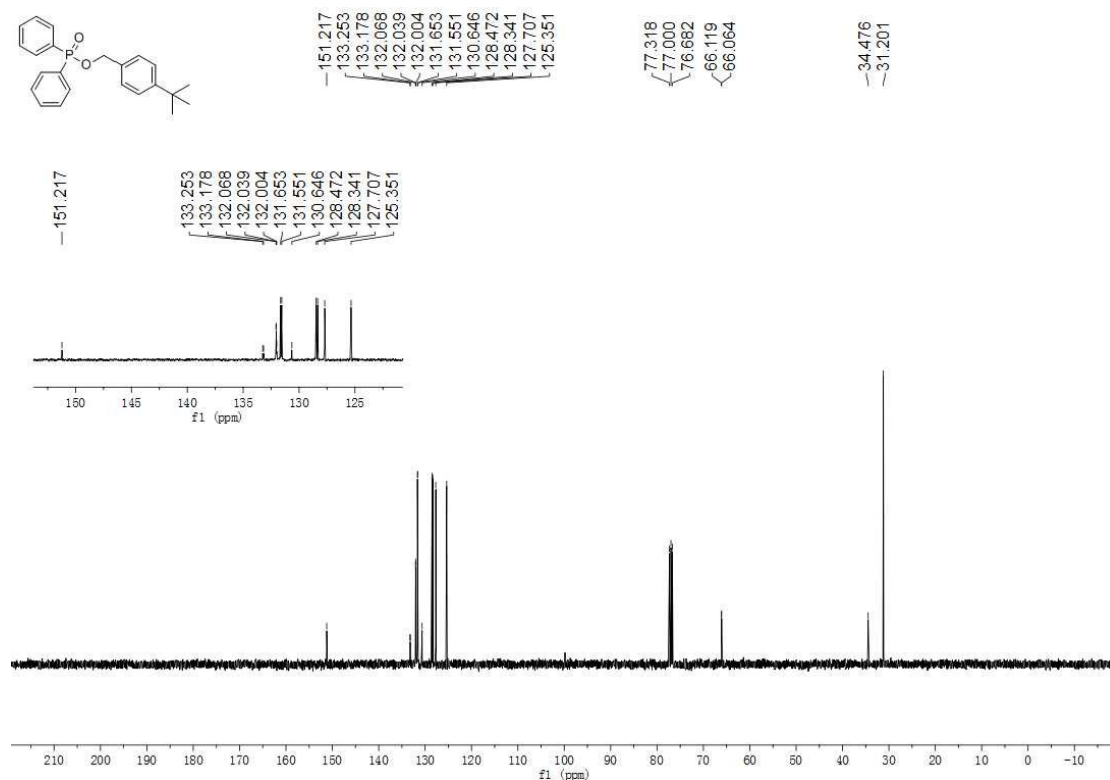

<sup>13</sup>C NMR (100MHz, CDCl<sub>3</sub>) spectrum of compound **3q**

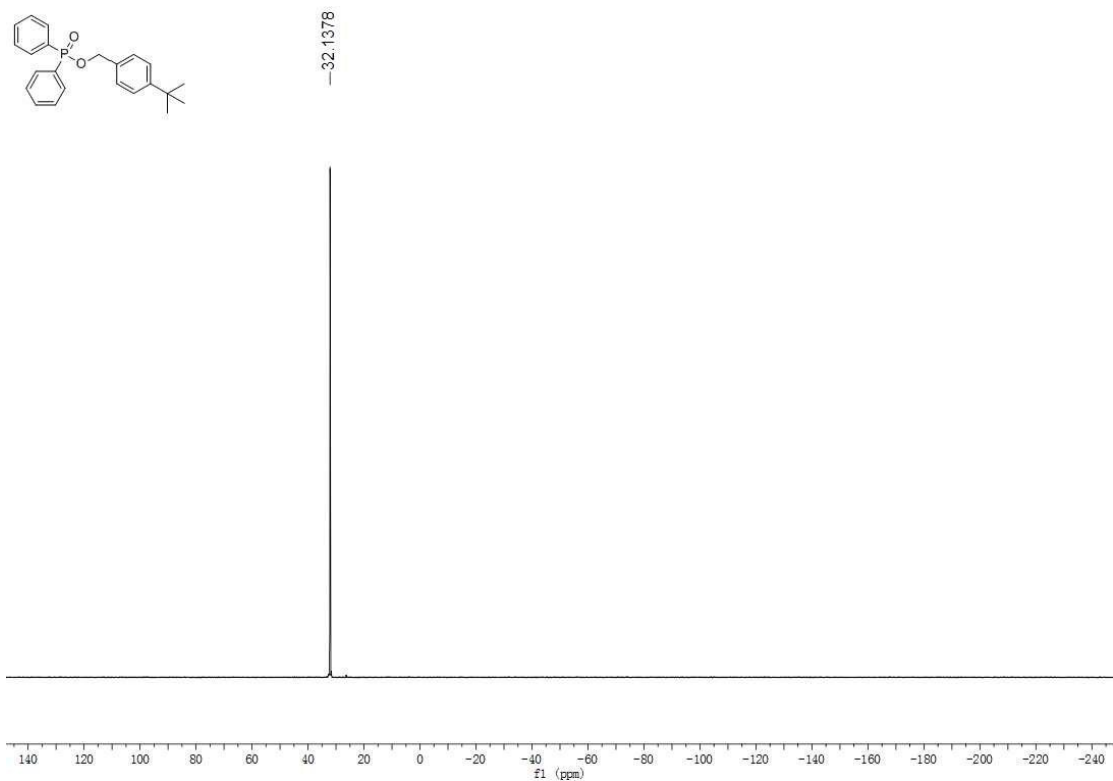

$^{31}\text{P}$  NMR (162MHz,  $\text{CDCl}_3$ ) spectrum of compound **3q**

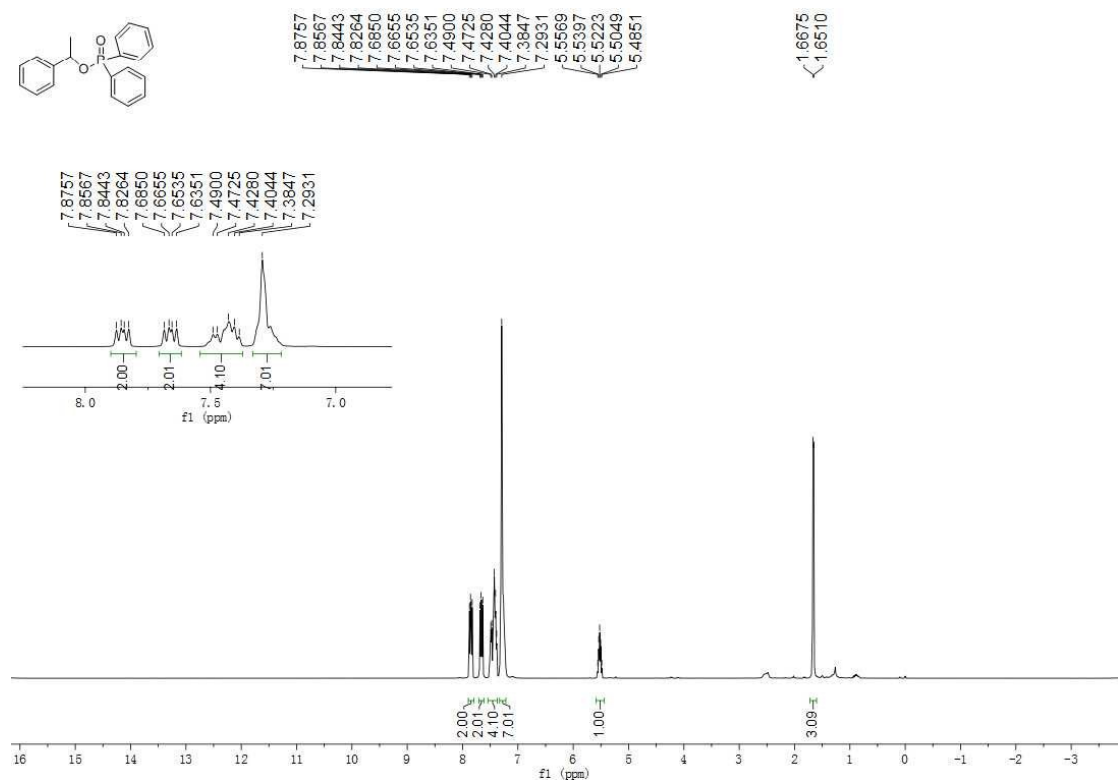

$^1\text{H}$  NMR (400MHz,  $\text{CDCl}_3$ ) spectrum of compound **3r**



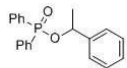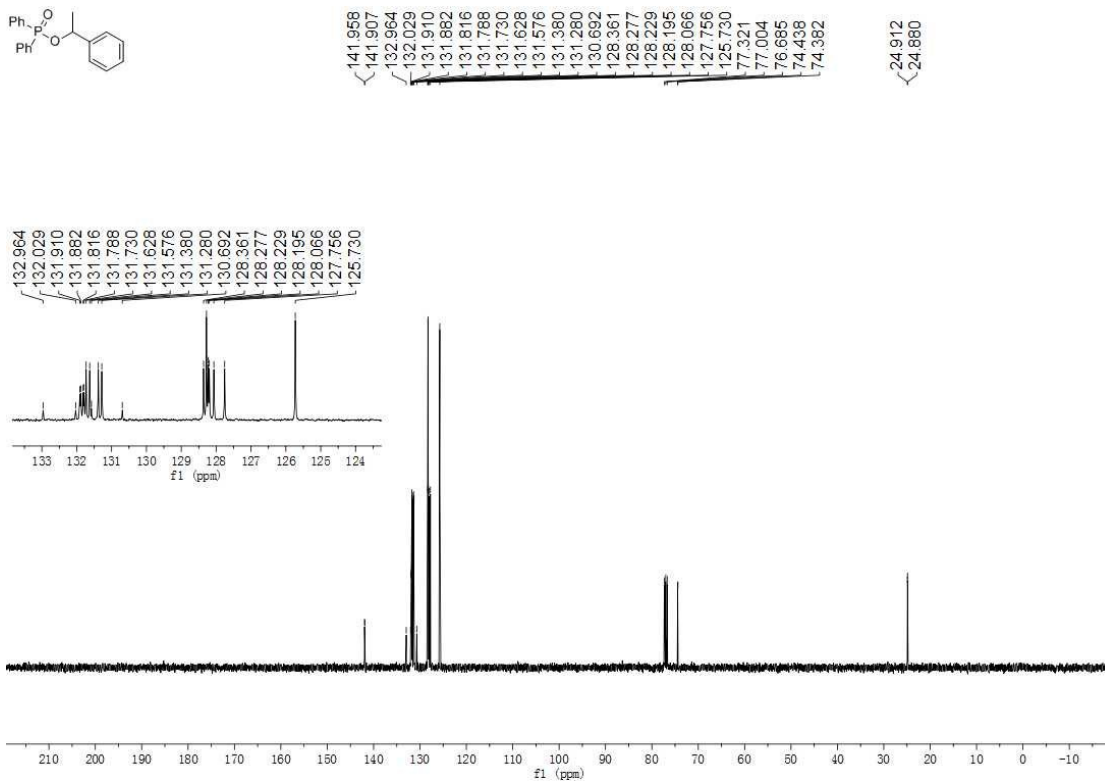

$^{13}\text{C}$  NMR (100MHz,  $\text{CDCl}_3$ ) spectrum of compound **3r**<sup>3</sup>

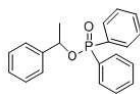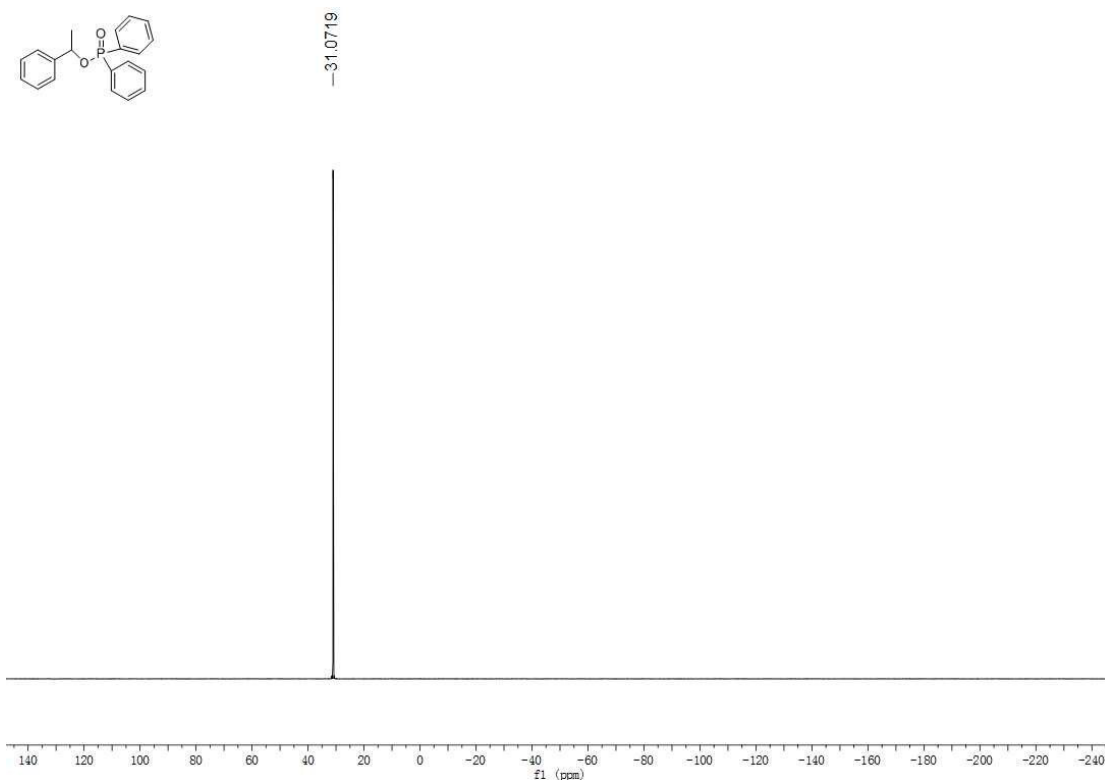

$^{31}\text{P}$  NMR (162MHz,  $\text{CDCl}_3$ ) spectrum of compound **3r**

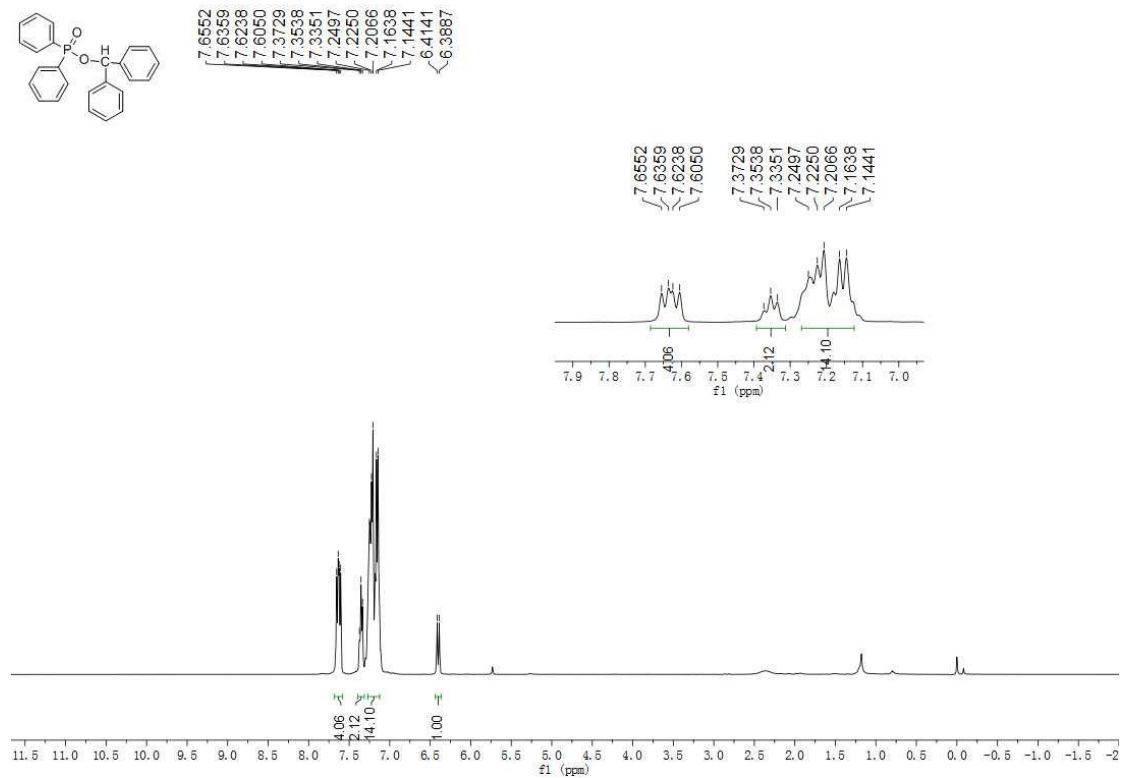

<sup>1</sup>H NMR (400MHz, CDCl<sub>3</sub>) spectrum of compound **3s**

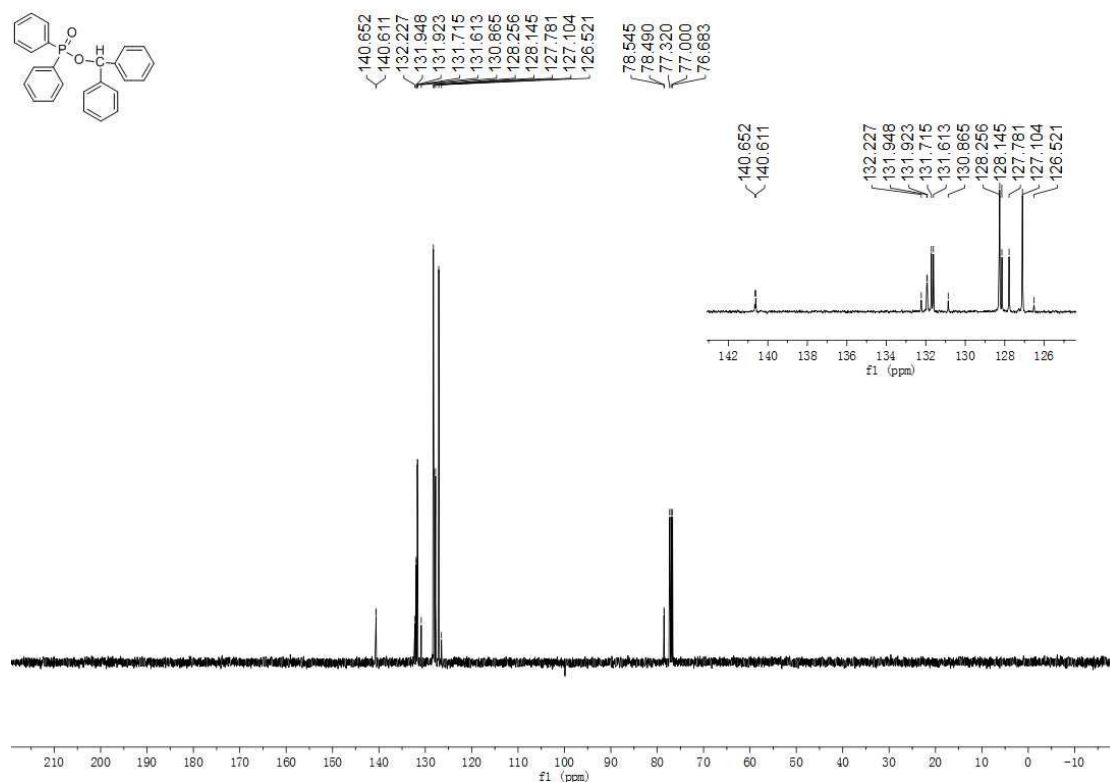

<sup>13</sup>C NMR (100MHz, CDCl<sub>3</sub>) spectrum of compound **3s**

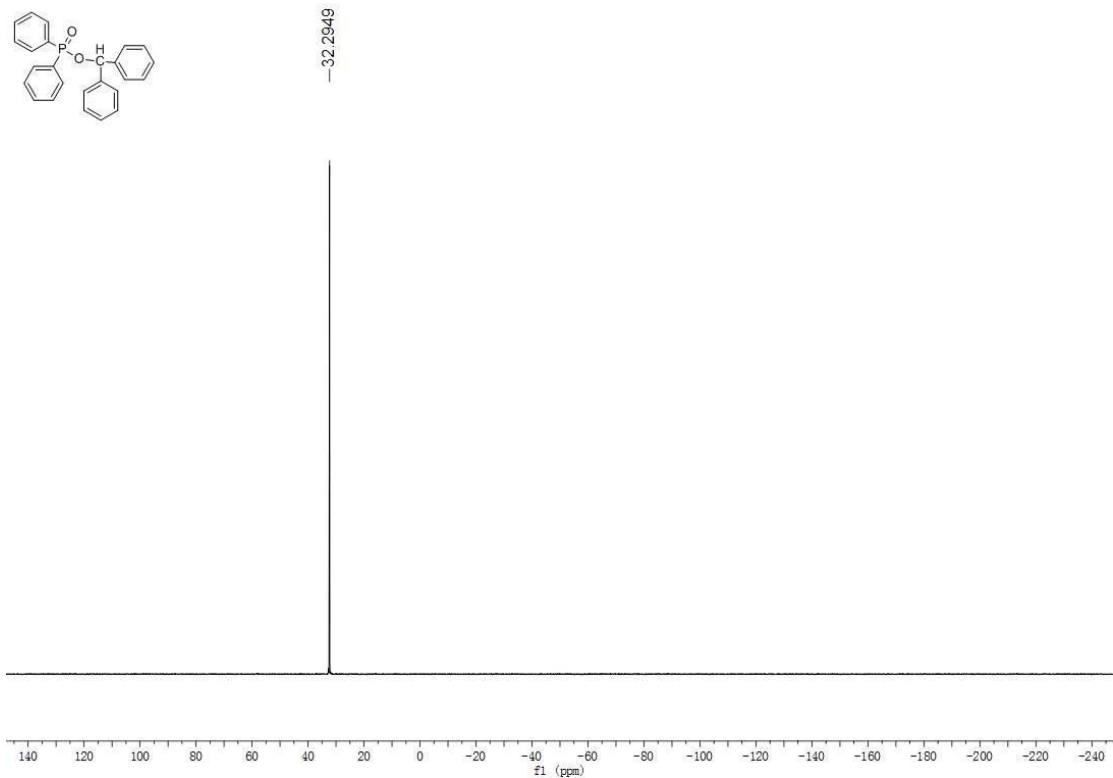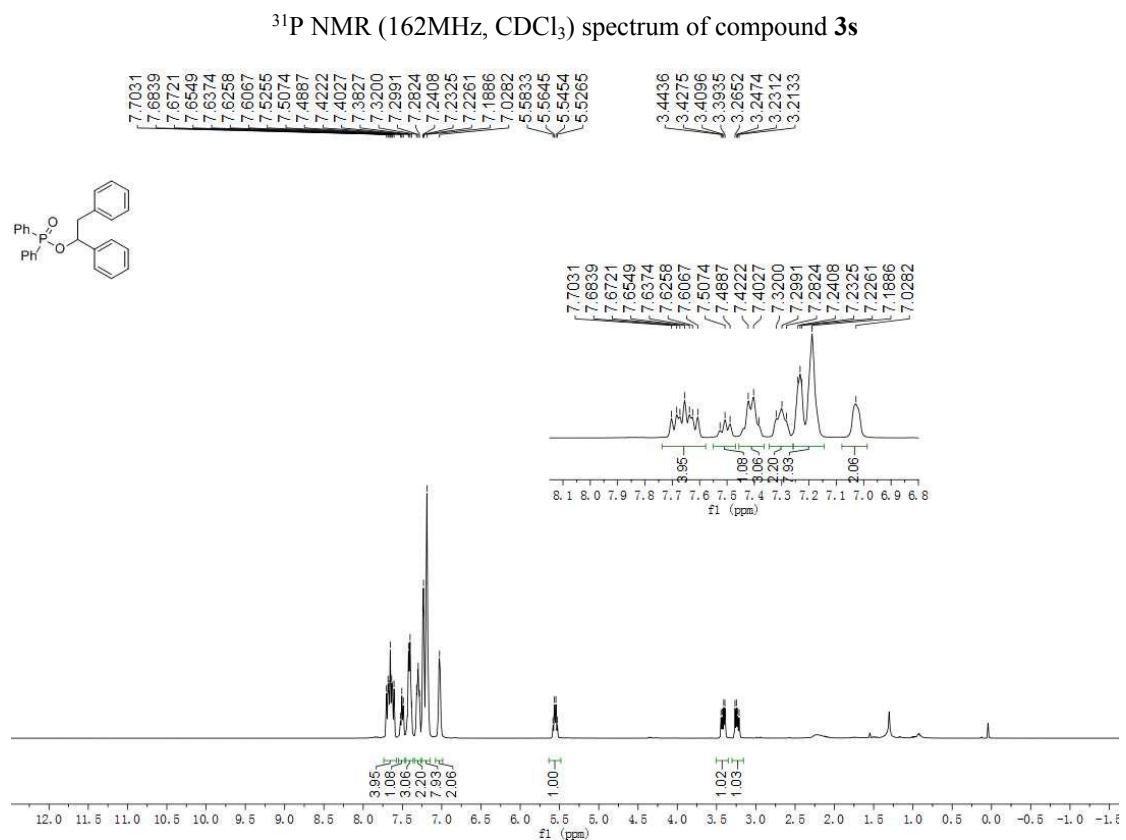

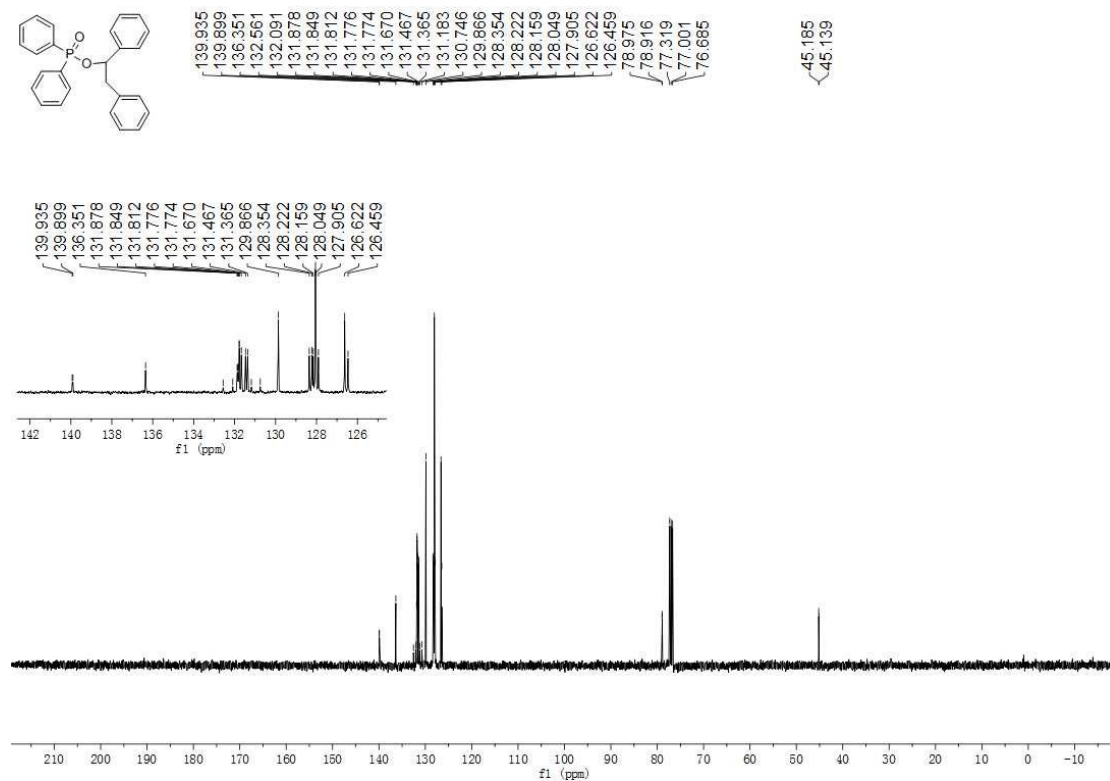

$^{13}\text{C}$  NMR (100MHz,  $\text{CDCl}_3$ ) spectrum of compound **3t**

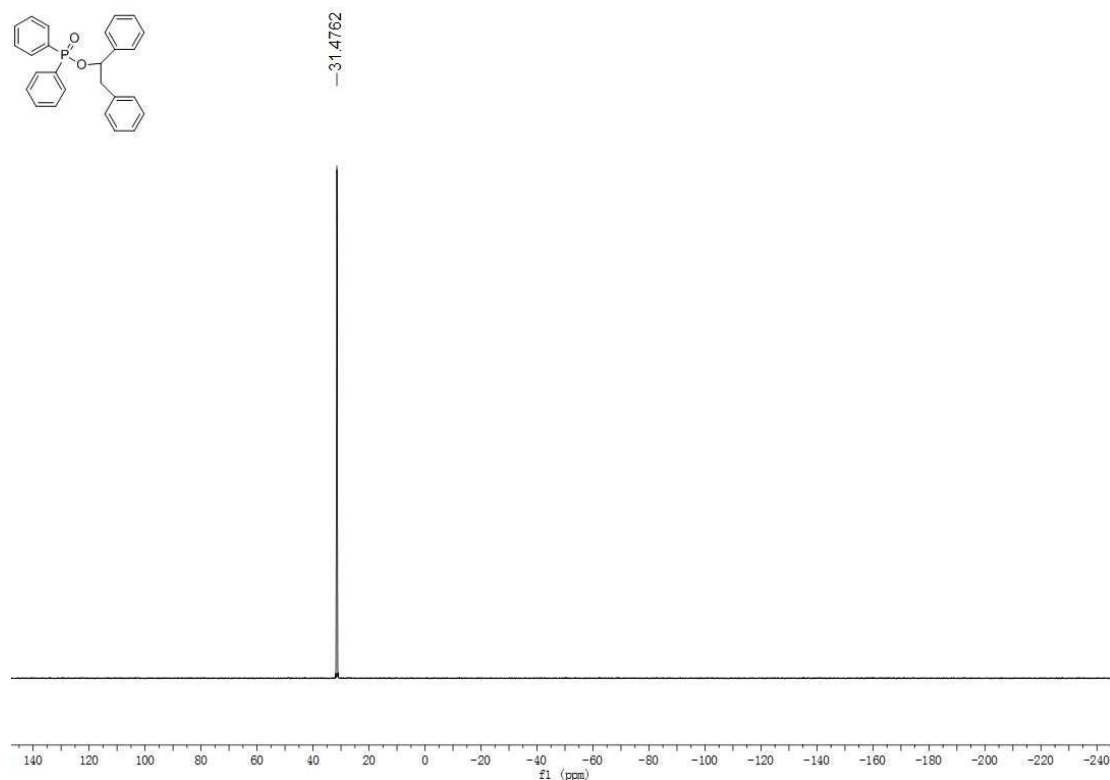

$^{31}\text{P}$  NMR (162MHz,  $\text{CDCl}_3$ ) spectrum of compound **3t**

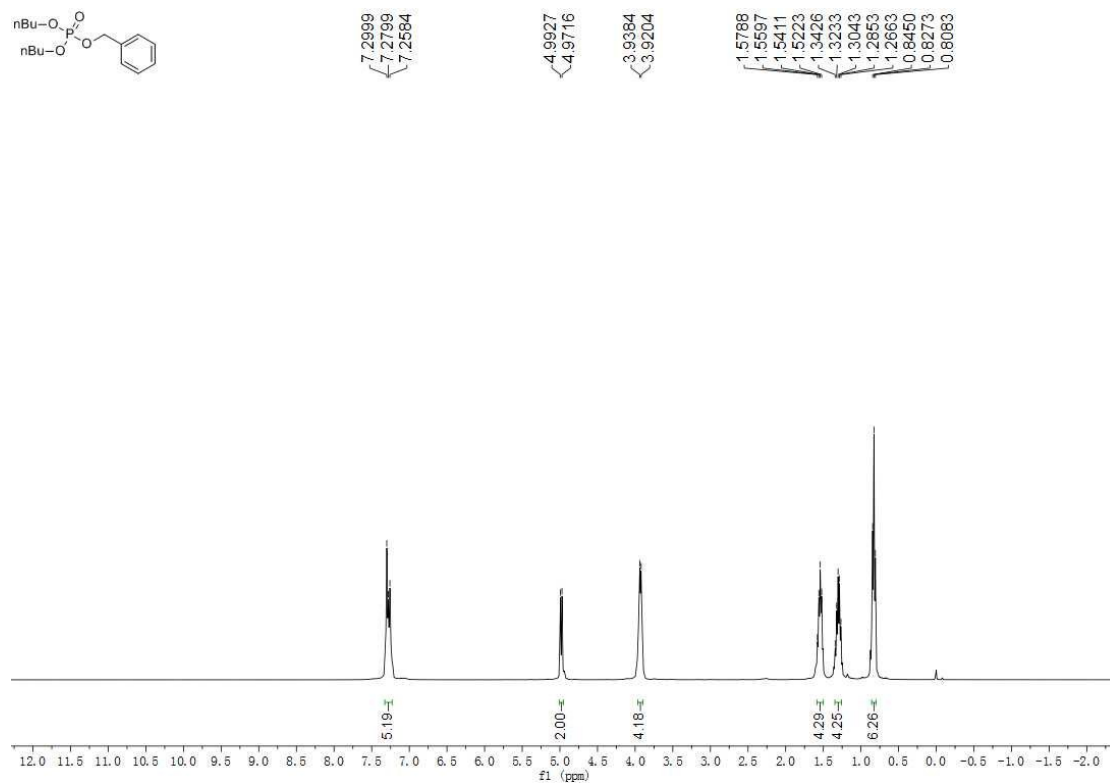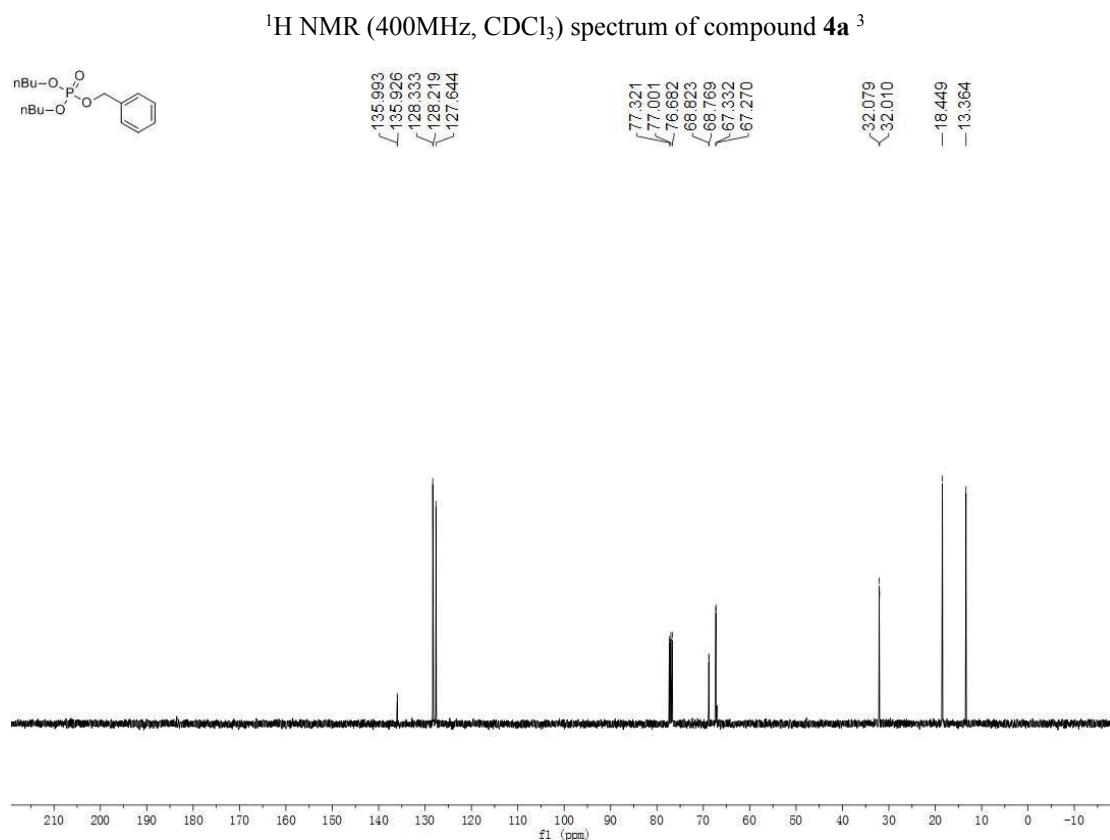

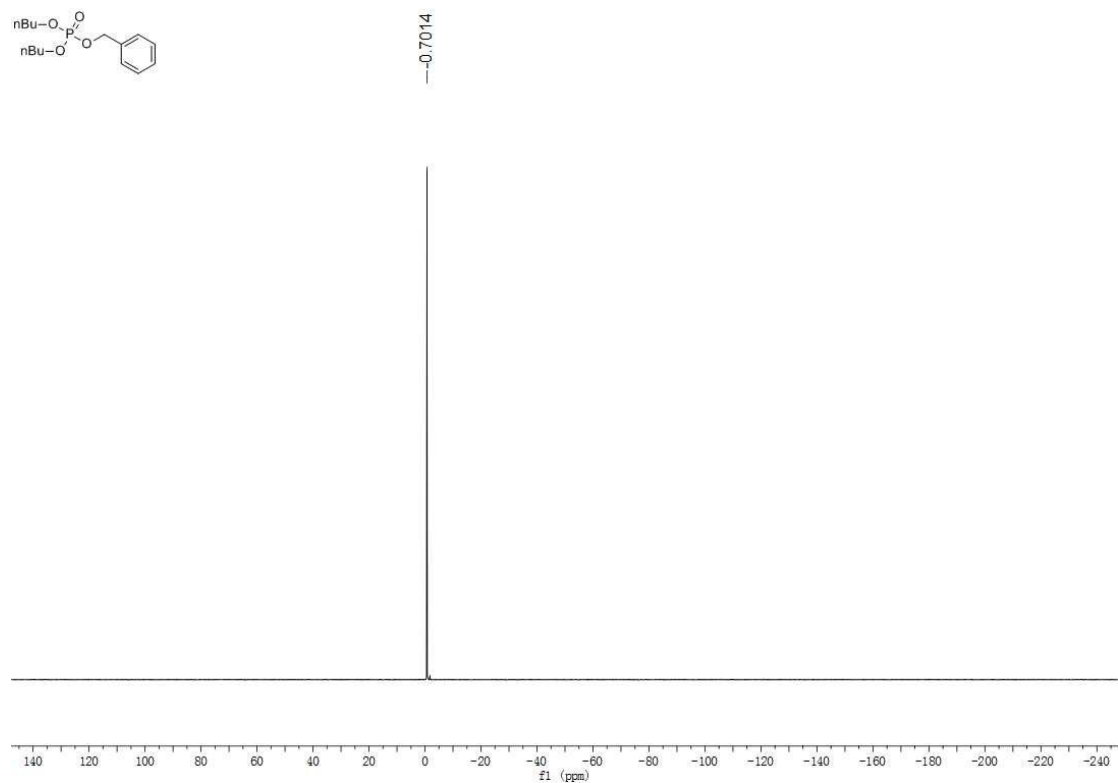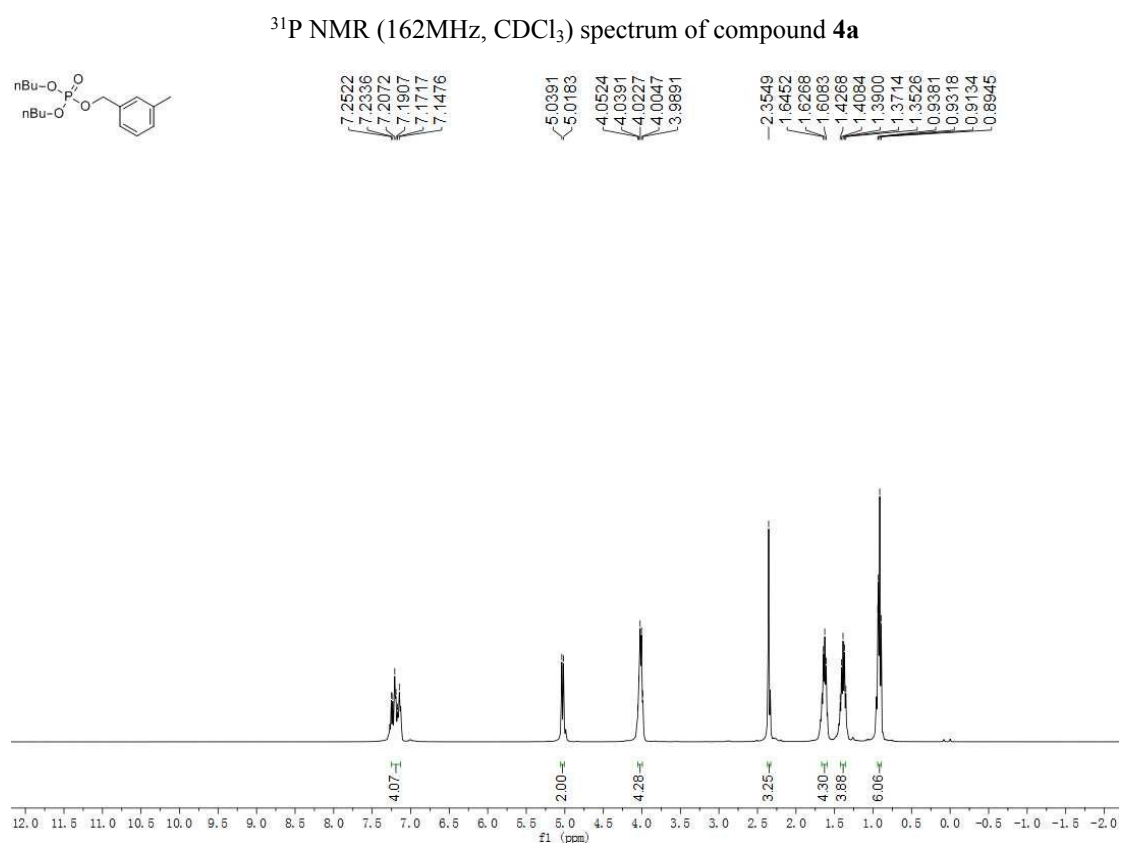

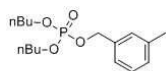

138.052  
135.927  
135.861  
128.991  
128.417  
128.282  
124.768

77.319  
77.001  
76.684  
68.932  
68.876  
67.356  
67.297

32.127  
32.058  
21.168  
18.499  
13.412

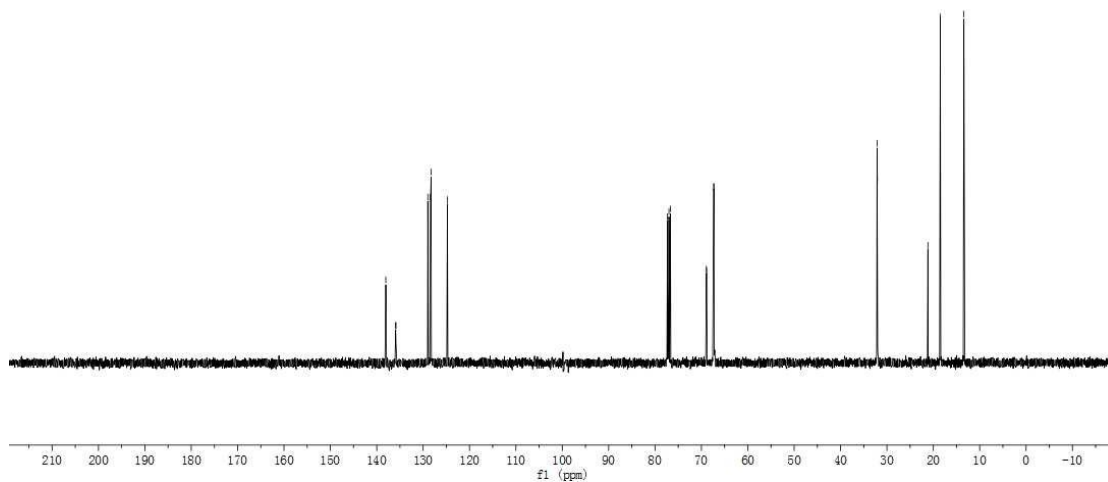

$^{13}\text{C}$  NMR (100MHz,  $\text{CDCl}_3$ ) spectrum of compound **4b**

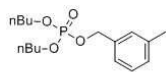

-0.6770

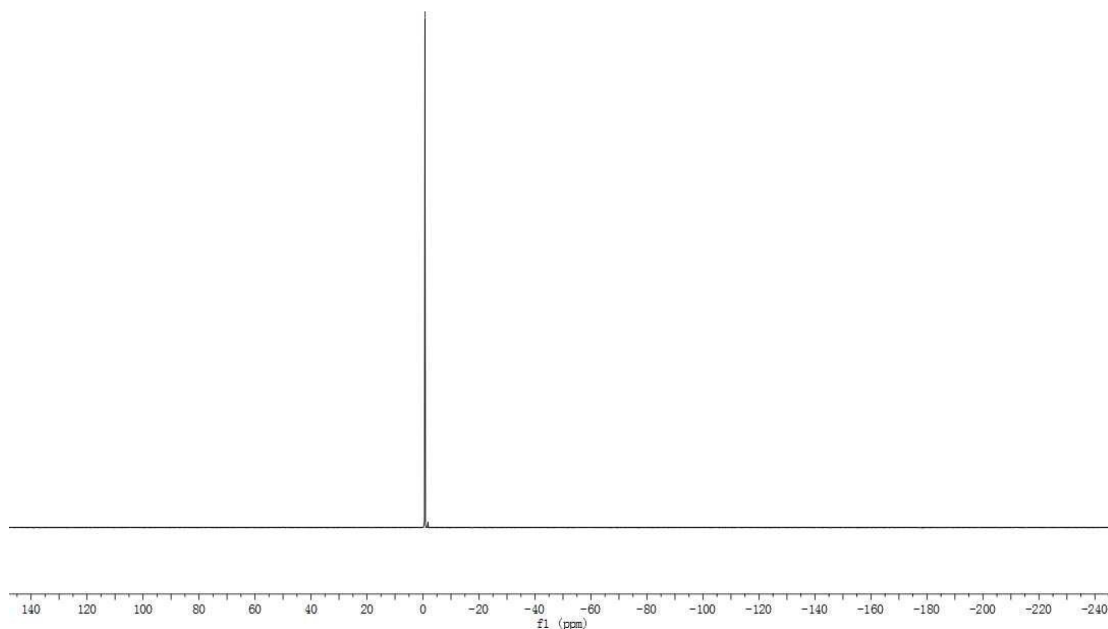

$^{31}\text{P}$  NMR (162MHz,  $\text{CDCl}_3$ ) spectrum of compound **4b**

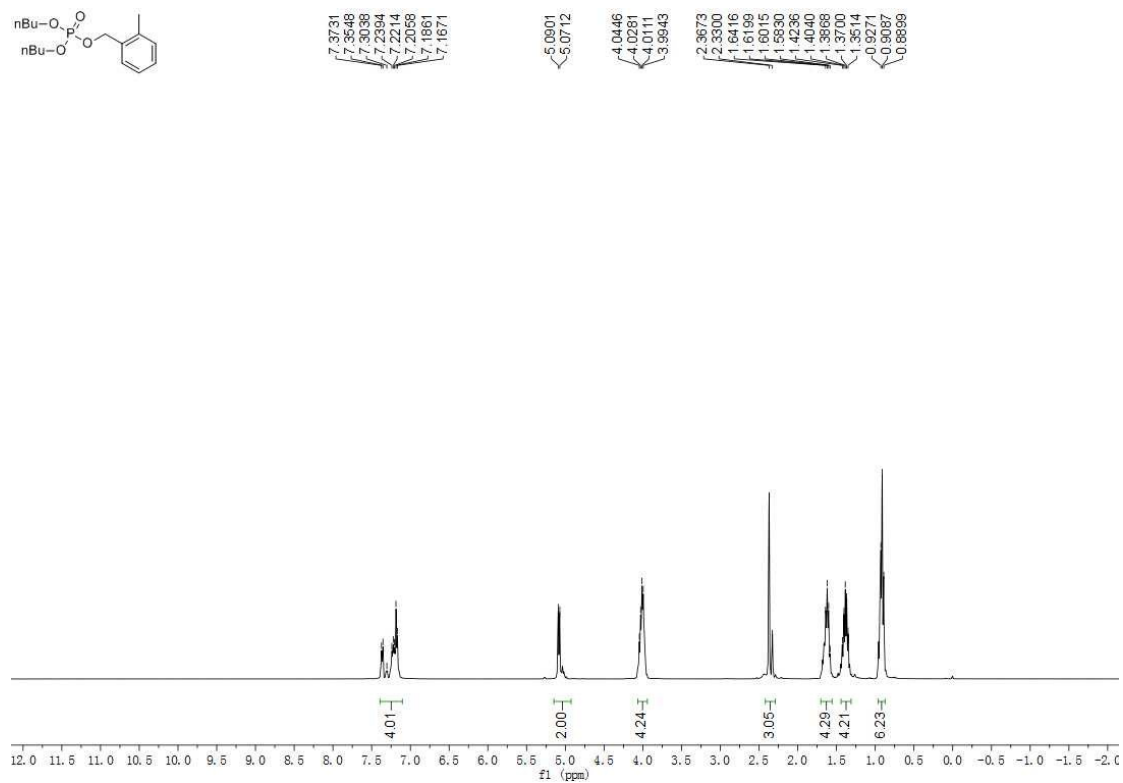

$^1\text{H}$  NMR (400MHz,  $\text{CDCl}_3$ ) spectrum of compound **4c**

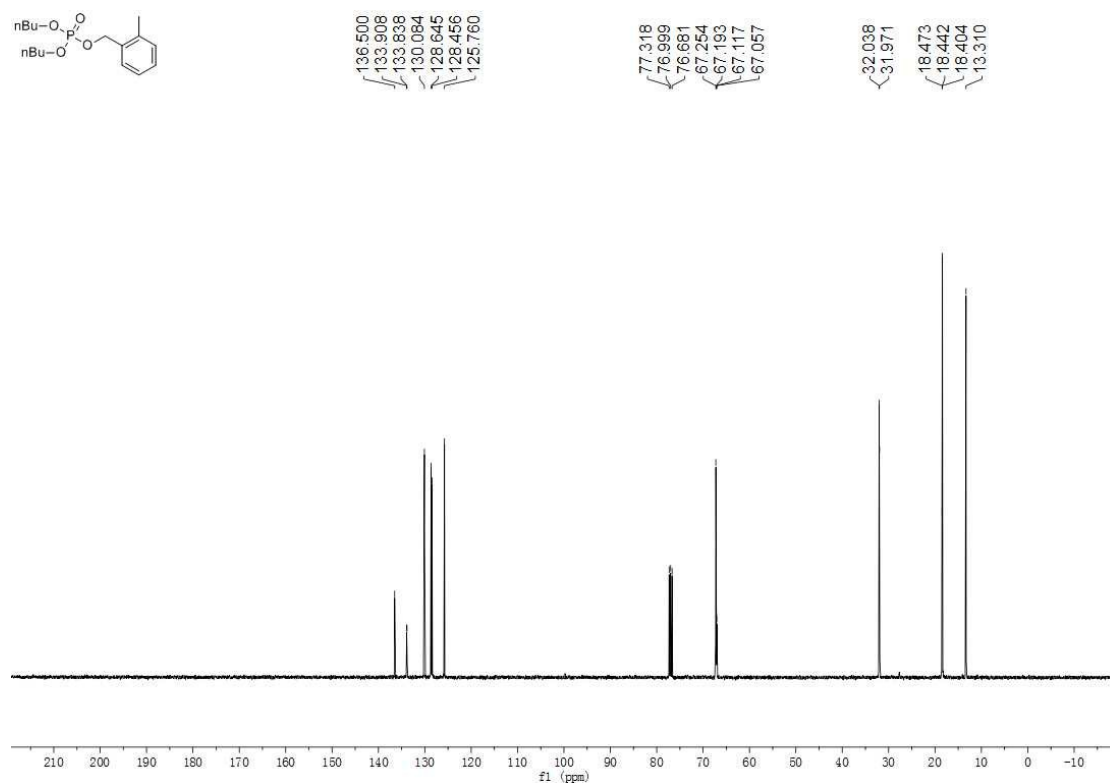

$^{13}\text{C}$  NMR (100MHz,  $\text{CDCl}_3$ ) spectrum of compound **4c**



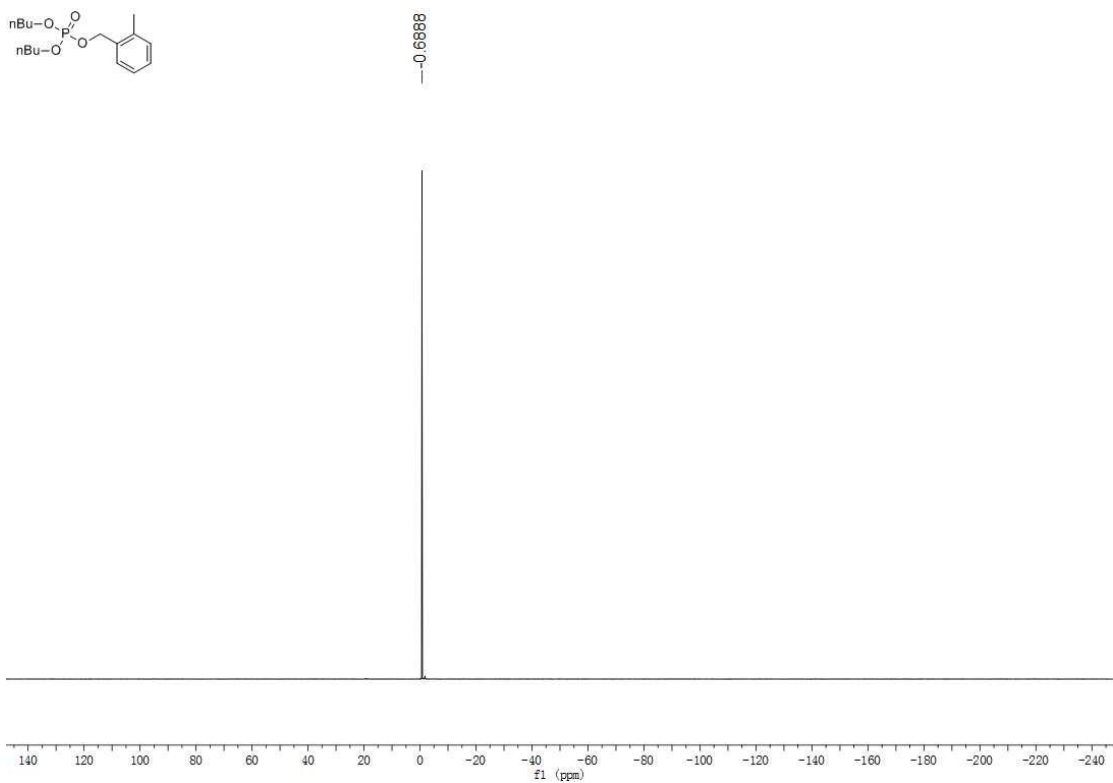

$^{31}\text{P}$  NMR (162MHz,  $\text{CDCl}_3$ ) spectrum of compound **4c**

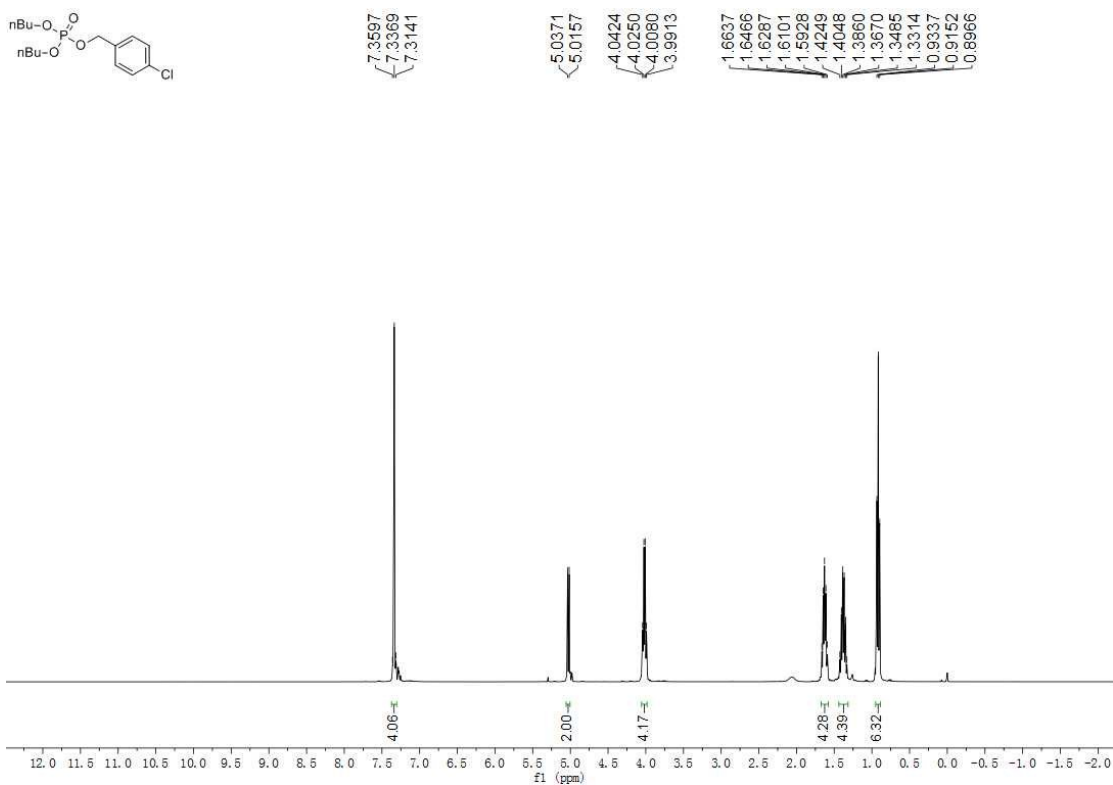

$^1\text{H}$  NMR (400MHz,  $\text{CDCl}_3$ ) spectrum of compound **4d**

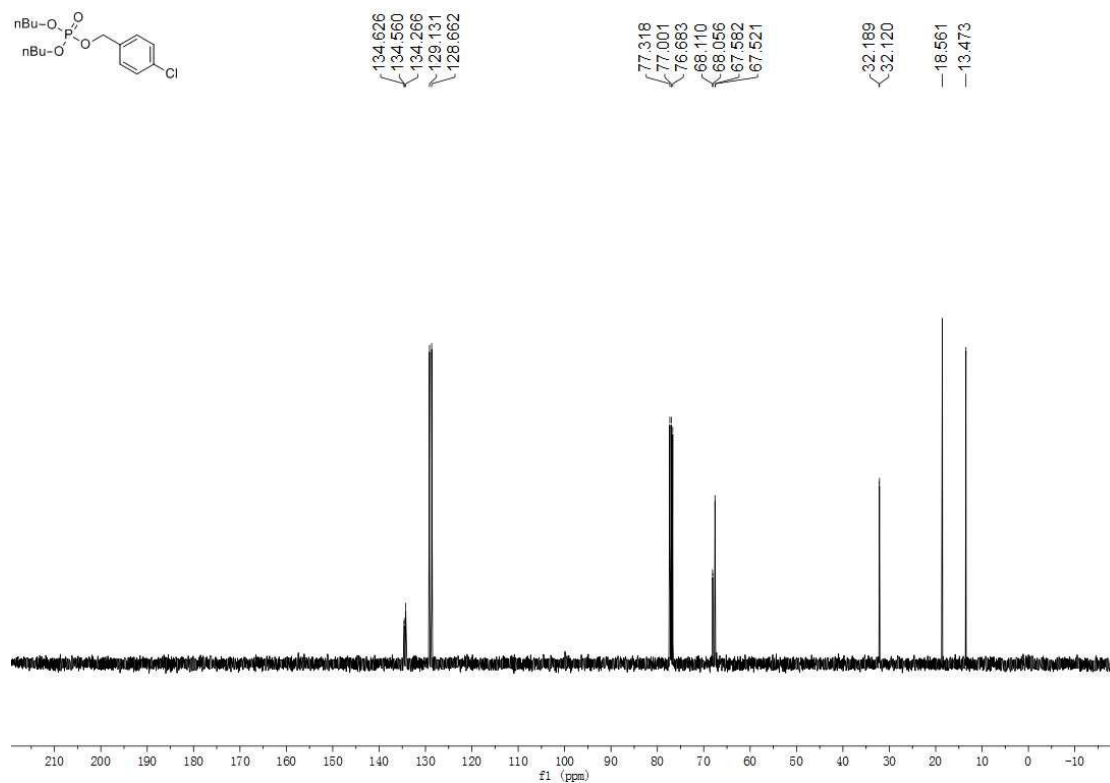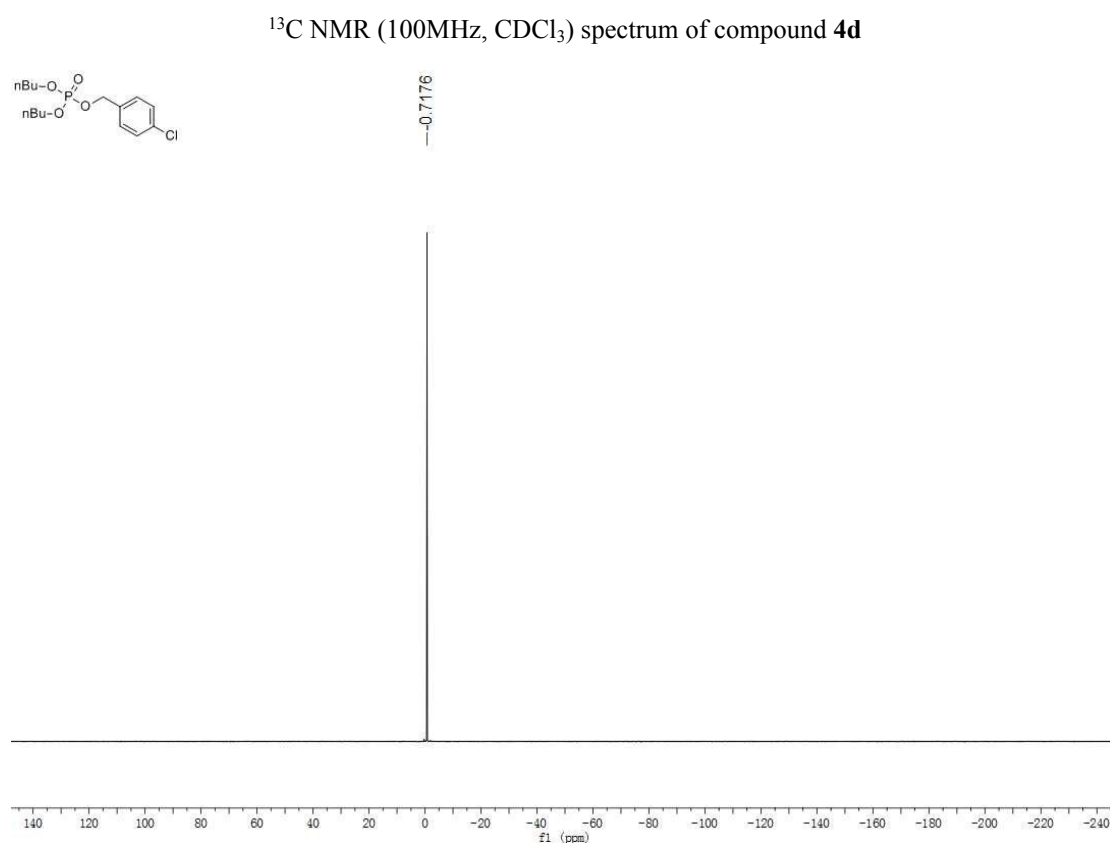

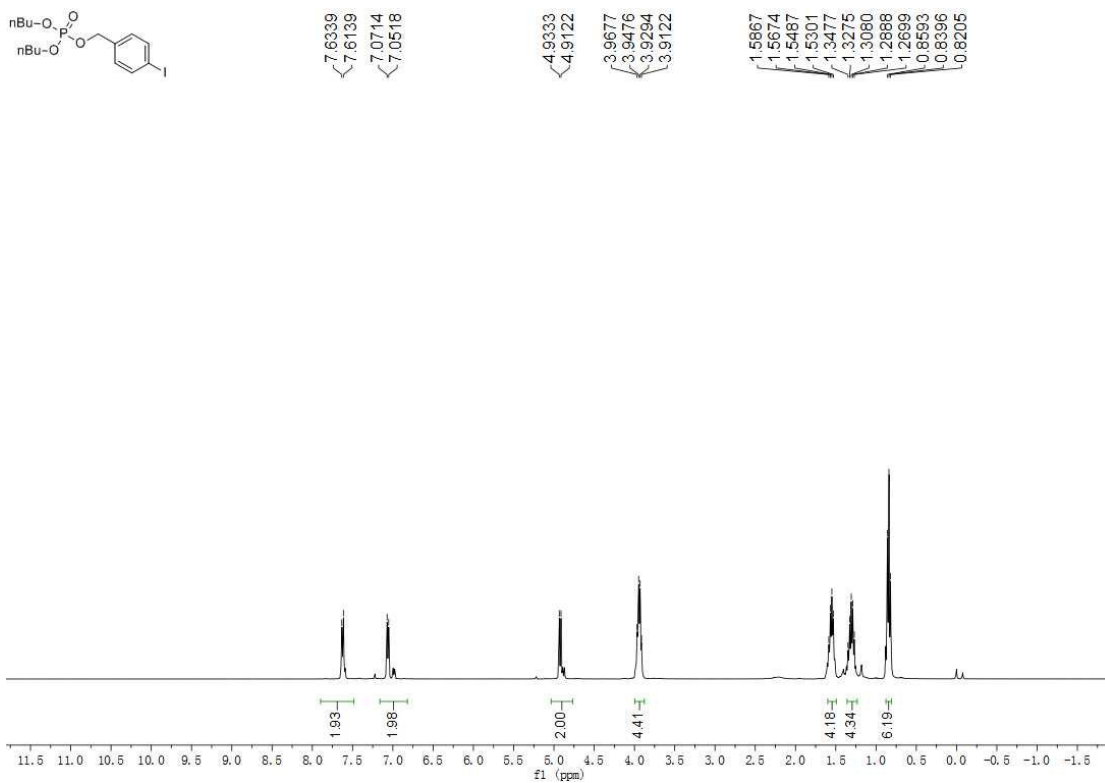

$^1\text{H}$  NMR (400MHz,  $\text{CDCl}_3$ ) spectrum of compound **4e**

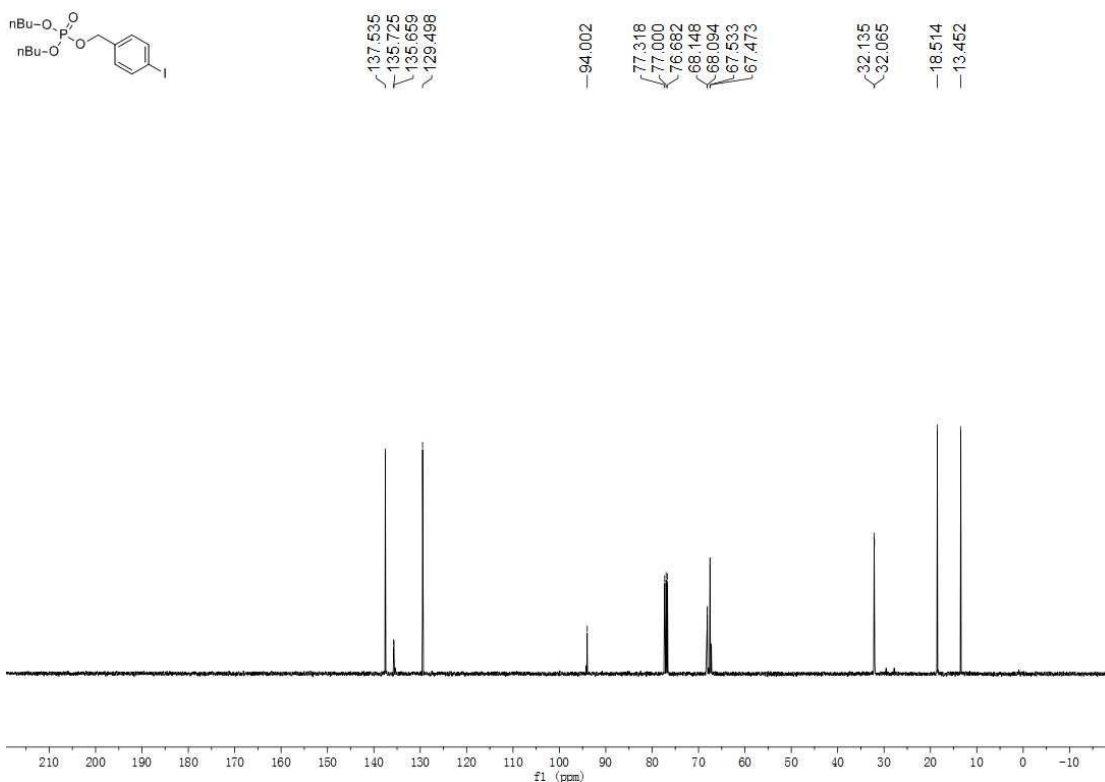

$^{13}\text{C}$  NMR (100MHz,  $\text{CDCl}_3$ ) spectrum of compound **4e**

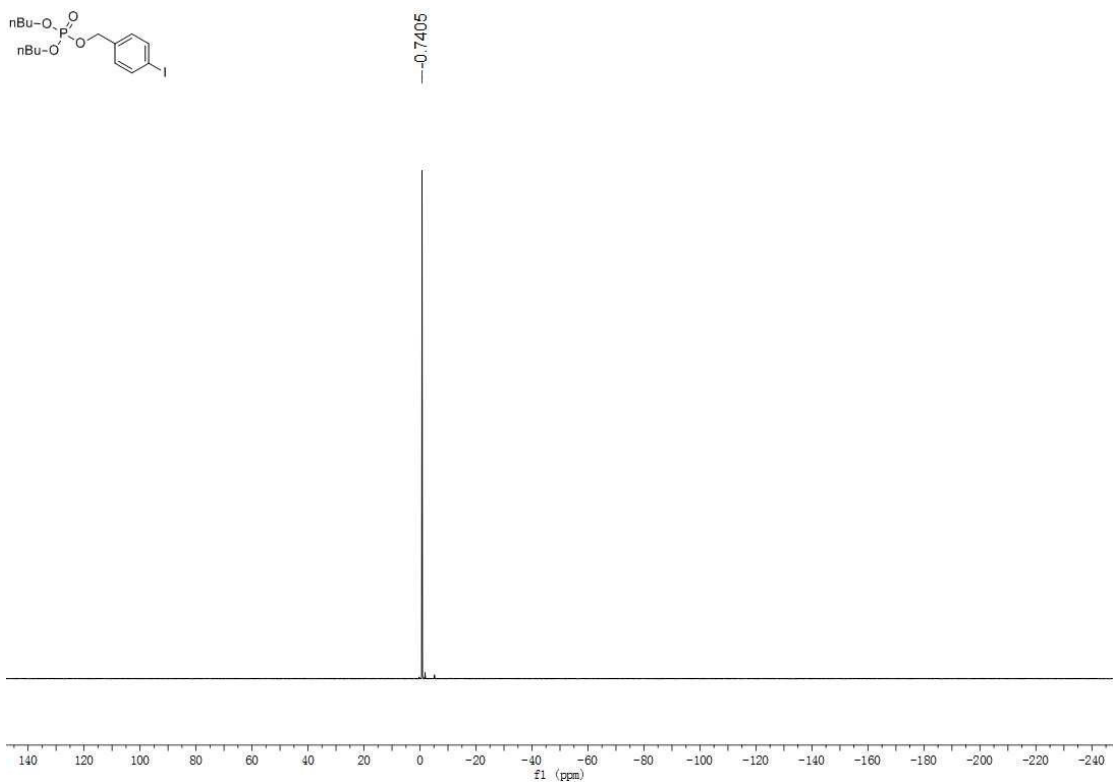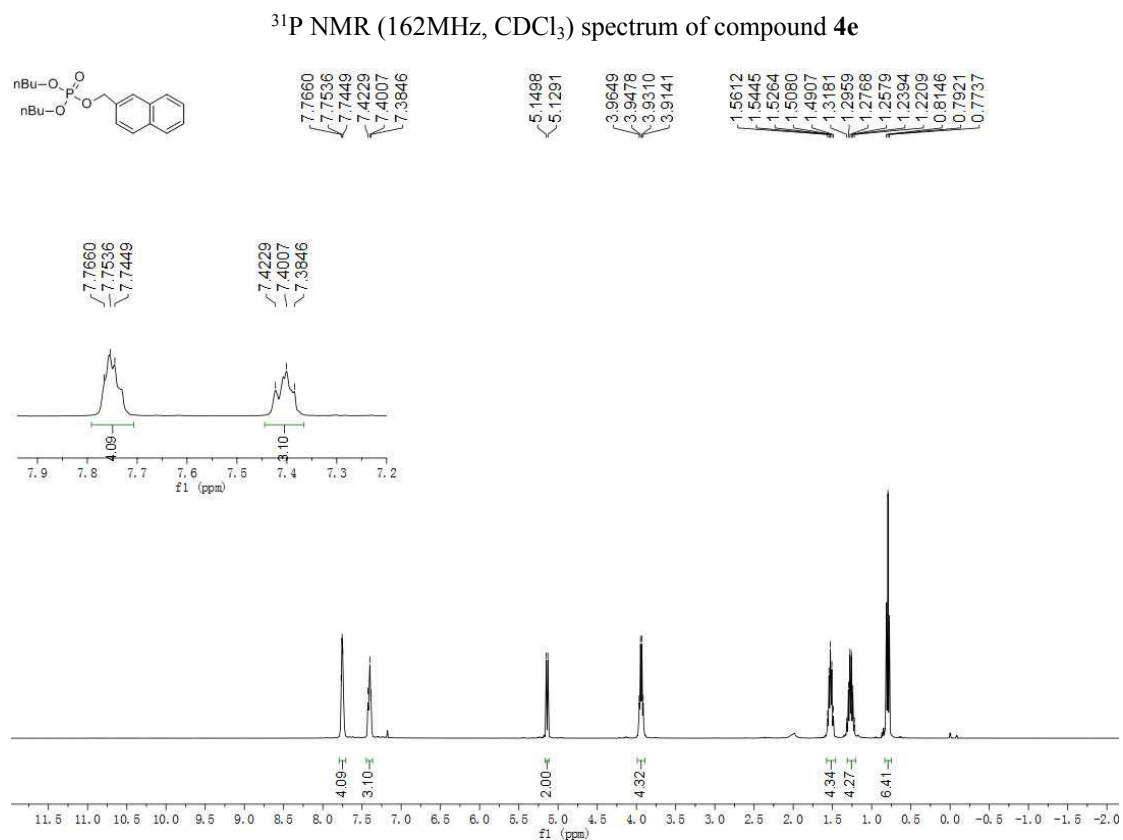

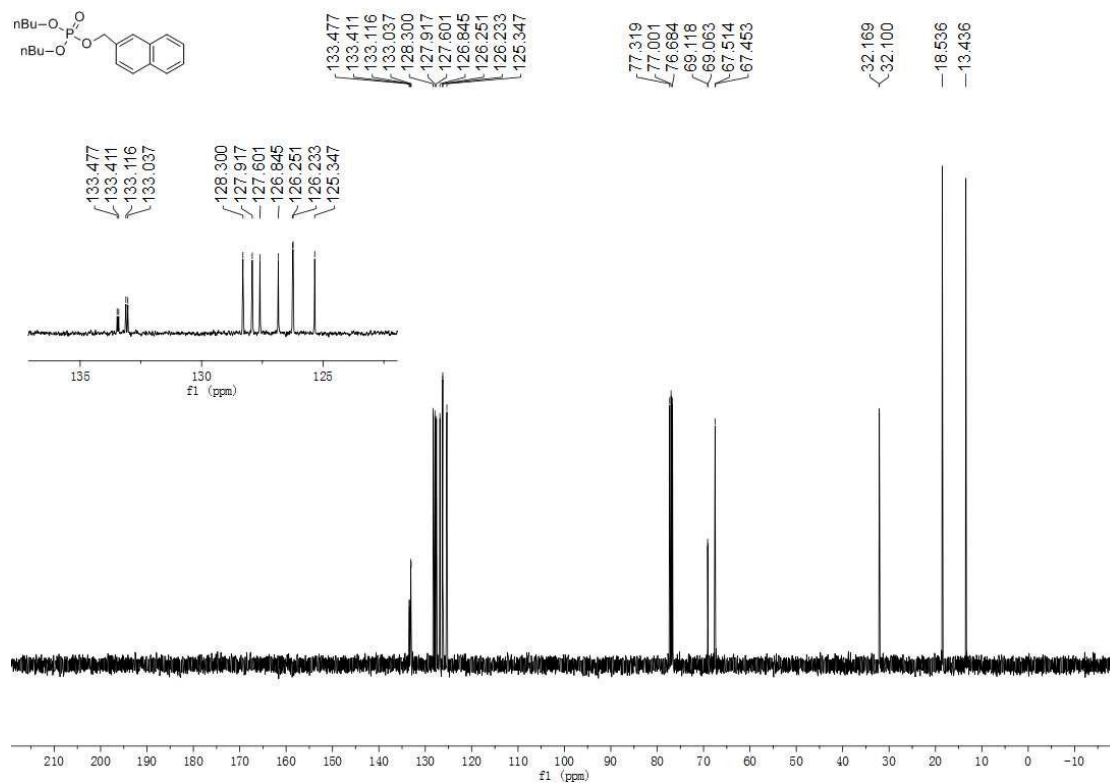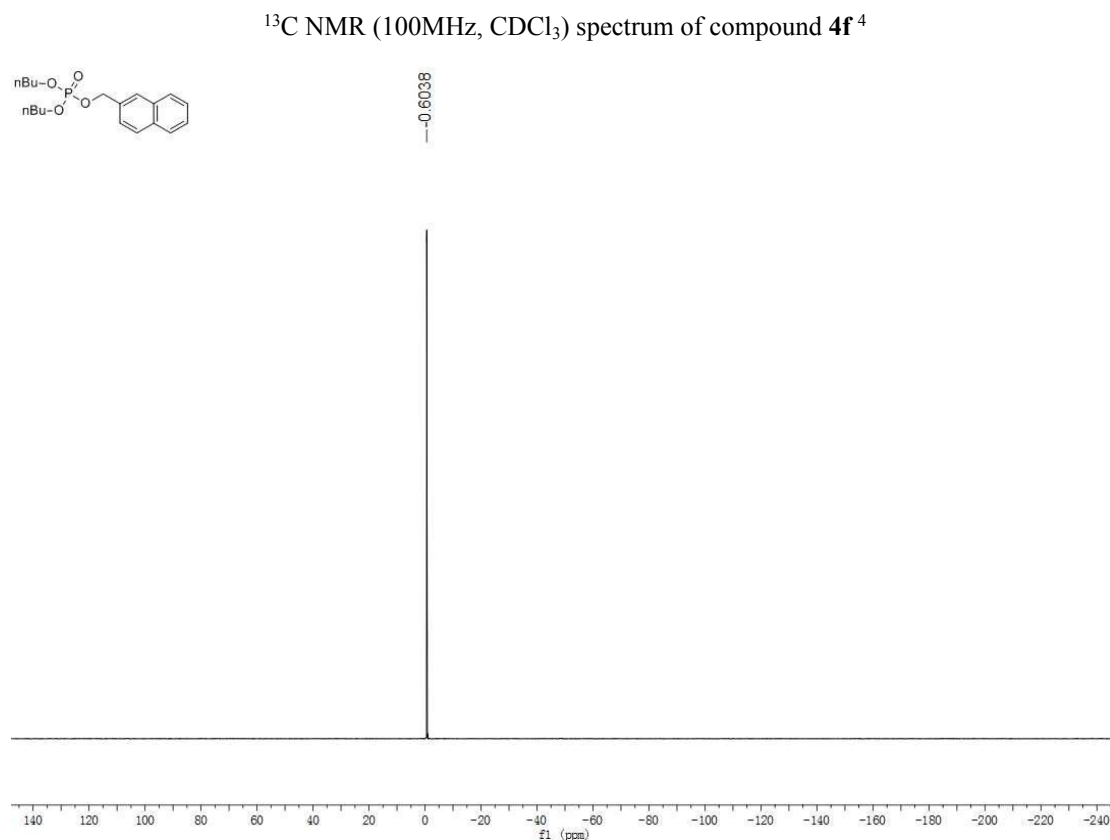

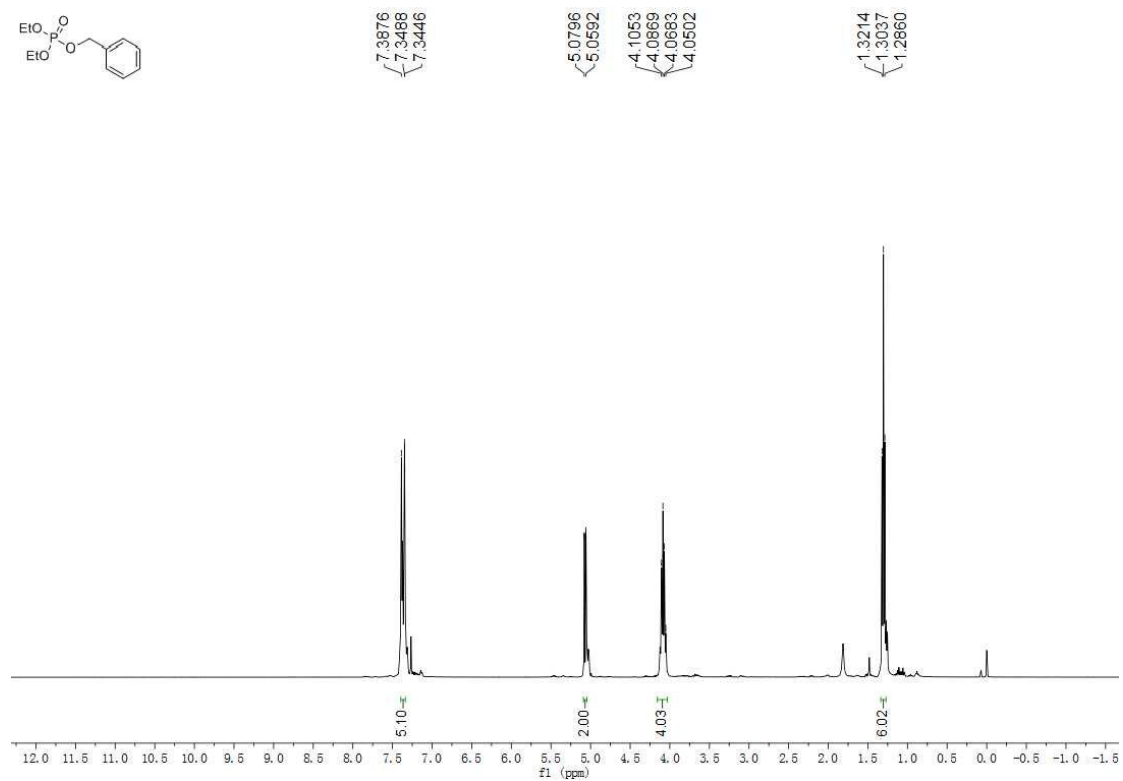

$^1\text{H}$  NMR (400MHz,  $\text{CDCl}_3$ ) spectrum of compound **4g**<sup>3</sup>

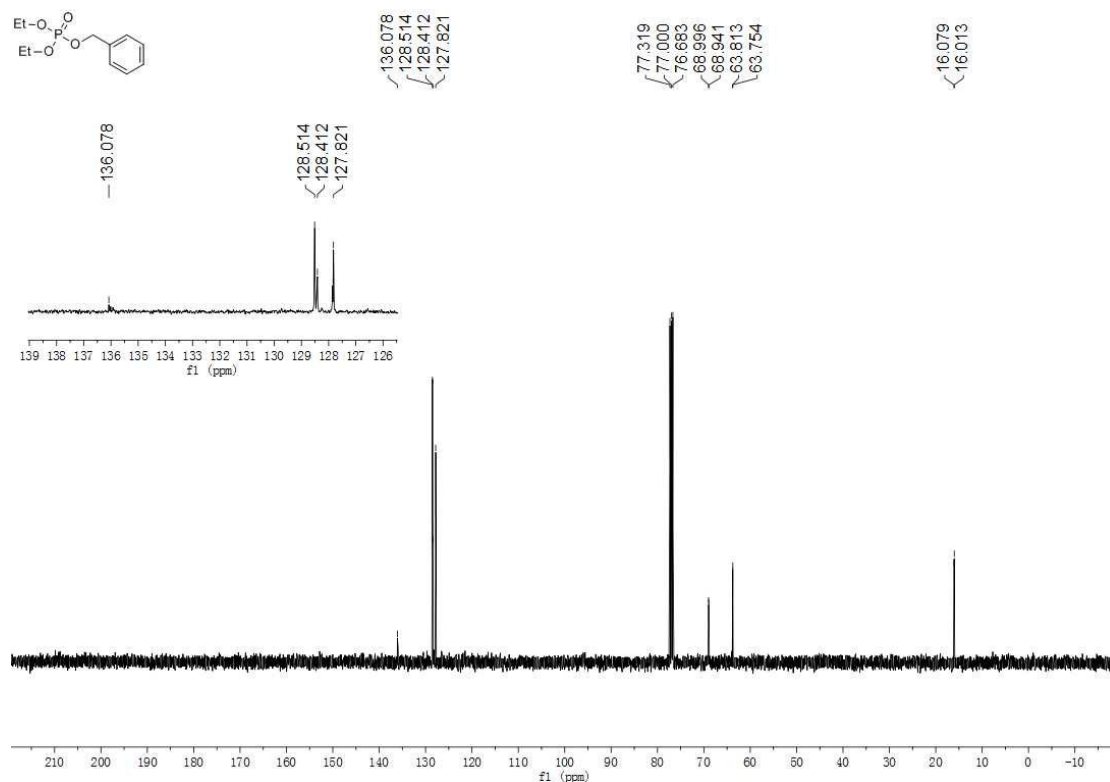

$^{13}\text{C}$  NMR (100MHz,  $\text{CDCl}_3$ ) spectrum of compound **4g**<sup>3</sup>

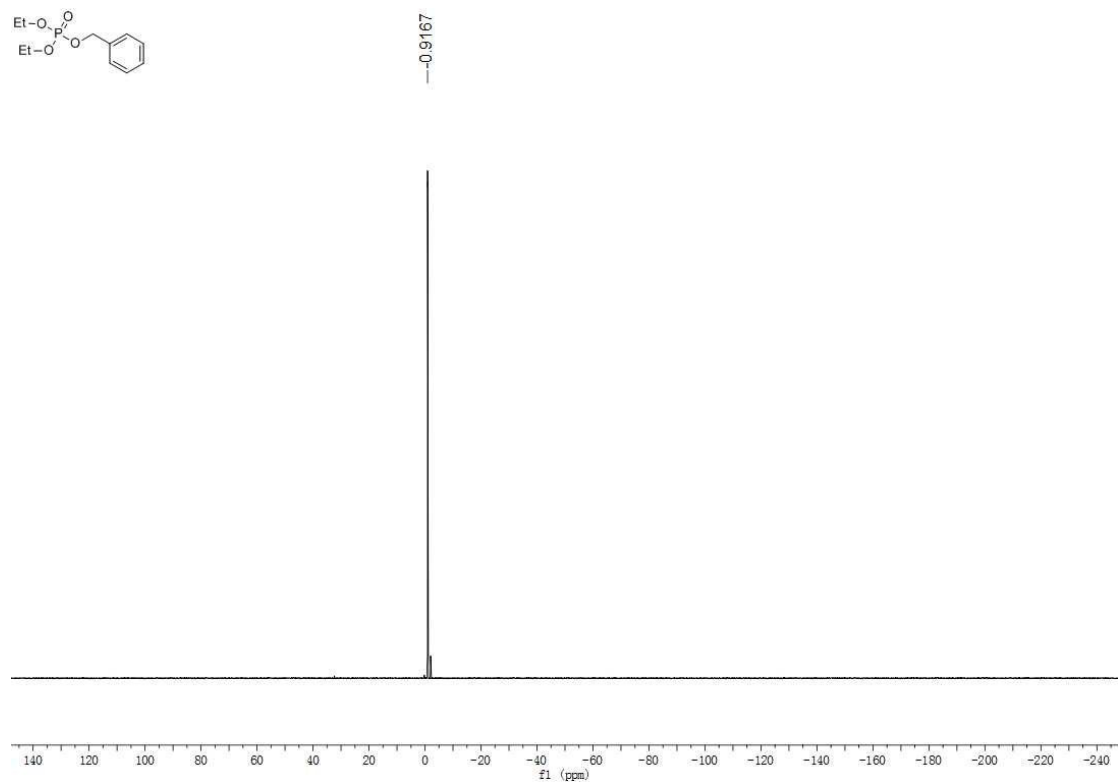

$^{31}\text{P}$  NMR (162MHz,  $\text{CDCl}_3$ ) spectrum of compound **4g**

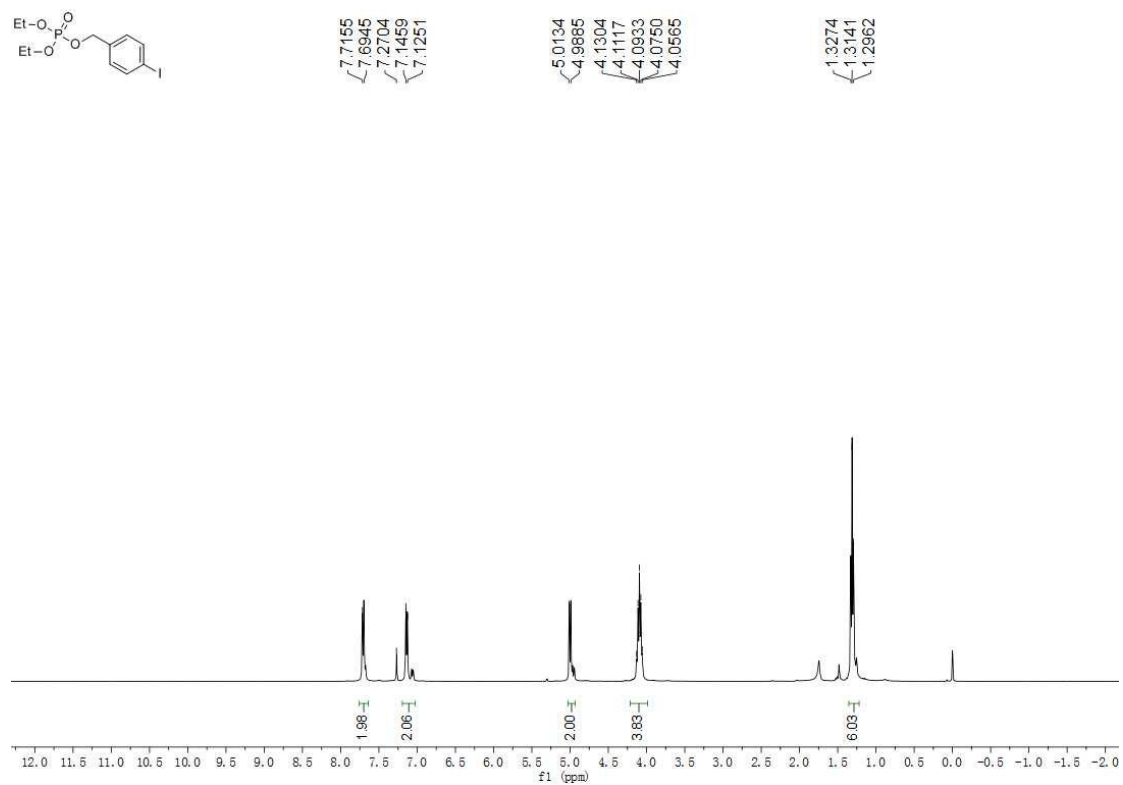

$^1\text{H}$  NMR (400MHz,  $\text{CDCl}_3$ ) spectrum of compound **4h**

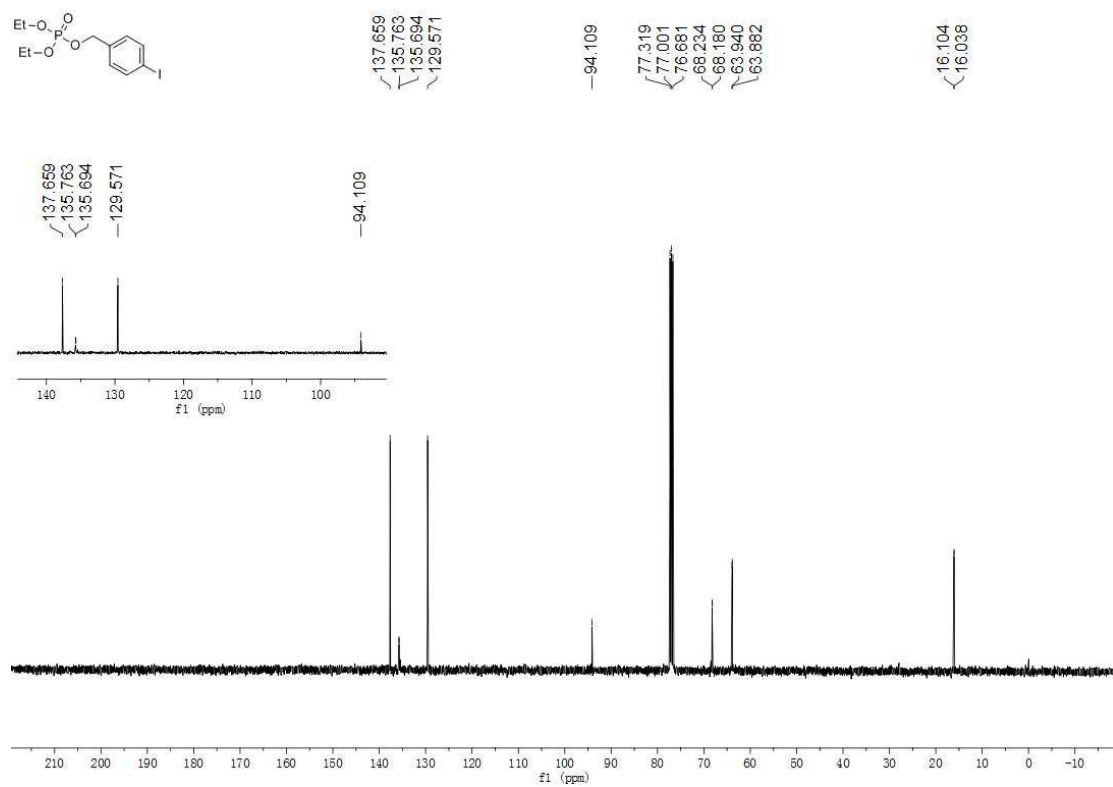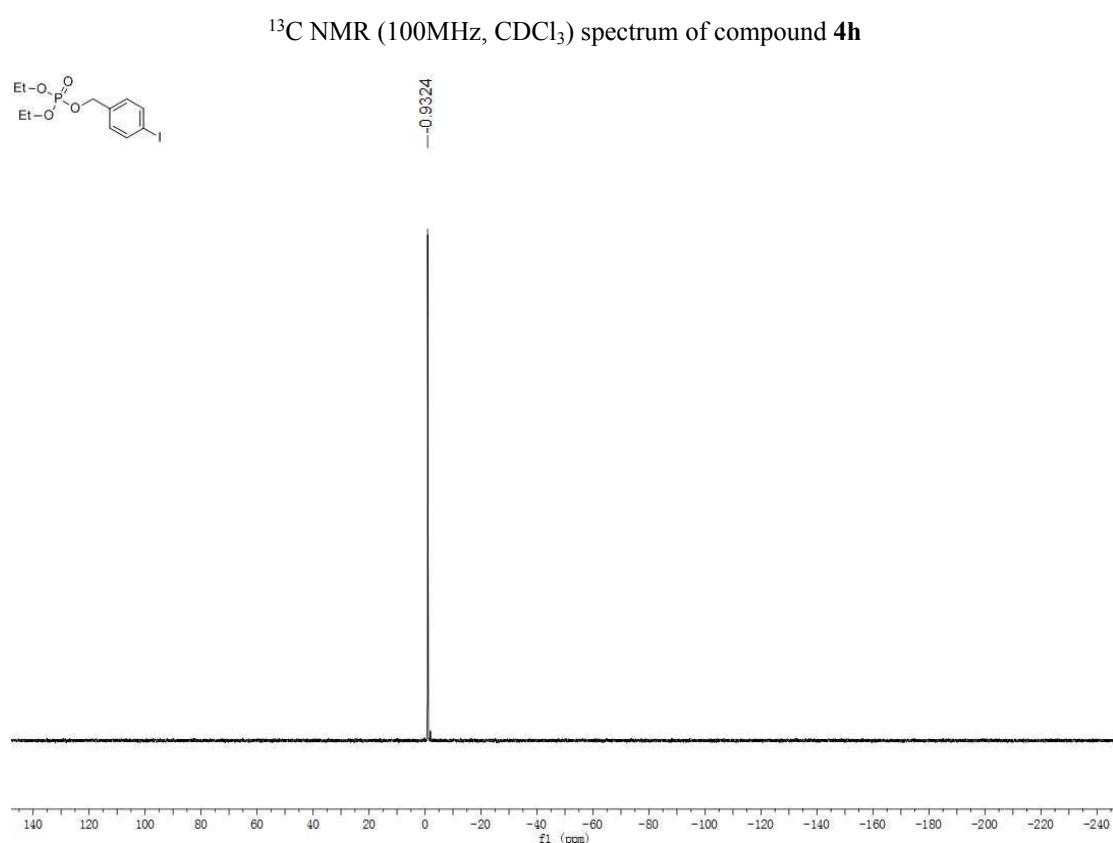



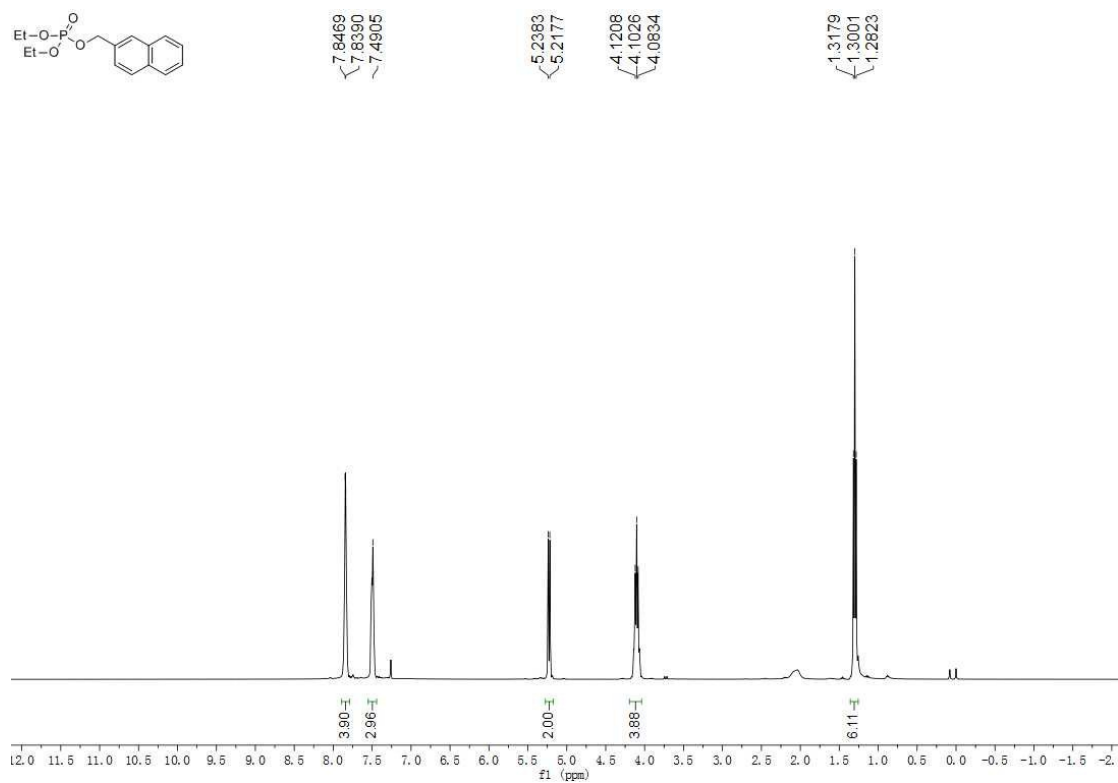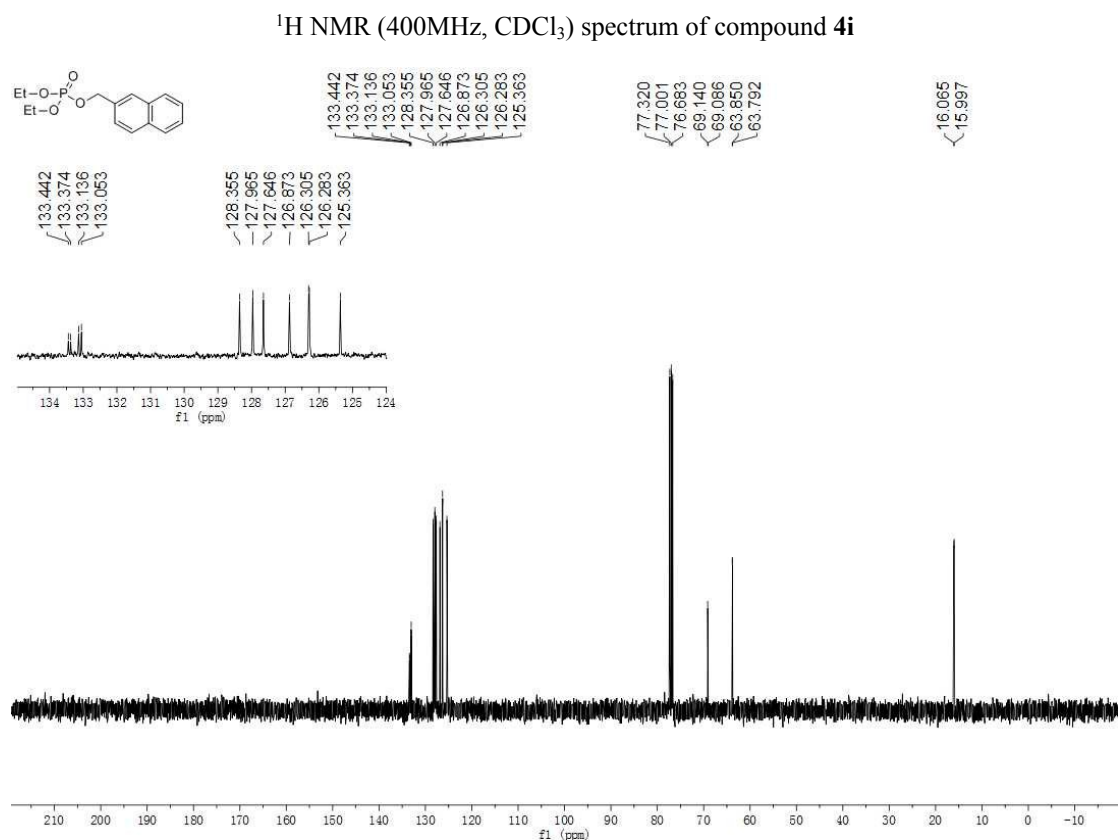

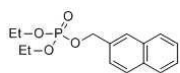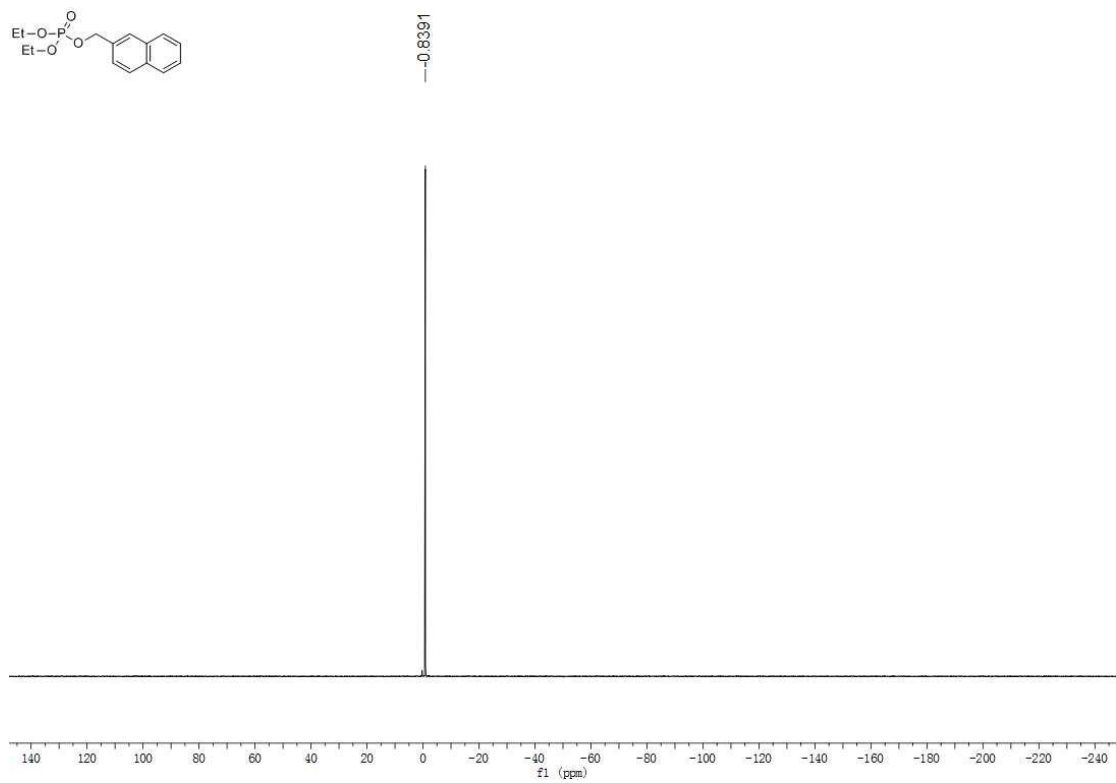

$^{31}\text{P}$  NMR (162MHz,  $\text{CDCl}_3$ ) spectrum of compound 4i

## References:

1. S. I. Murahashi, N. Miyaguchi, S. Noda, T. Naota, A. Fujii, Y. Inubushi and N. Komiya, *Eur. J. Org. Chem.*, 2011, 5355–5365.
2. B. Xiong, G. Wang, C. Zhou, Y. Liu, P. Zhang and K. Tang, *J. Org. Chem.*, 2018, **83**, 993–999.
3. J. Xu, P. Zhang, X. Li, Y. Gao, J. Wu, G. Tang and Y. Zhao, *Adv. Synth. Catal.*, 2014, **356**, 3331–3335.
4. B. Xiong, Q. Ye, X. Feng, L. Zhu, T. Chen, Y. Zhou, C.-T. Au and S.-F. Yin, *Tetrahedron*, 2014, **70**, 9057-9063.
